# Supplementary material for: Iron-catalysed reductive coupling for the synthesis of polyfluorinated compounds
Source: Royal Society of Chemistry journal article supplement (doi:10.1039/d2cc06022a), 2022-01-01

## *Supporting Information*

### **Iron-catalysed reductive coupling for the synthesis of polyfluorinated compounds**

Yu-Qiu Guan,<sup>a,c</sup> Tian-Zhang Wang,<sup>c</sup> Jia-Fan Qiao,<sup>c</sup> Zhangpei Chen,<sup>a\*</sup> Zhushuang Bai,<sup>b\*</sup>  
and Yu-Feng Liang<sup>c\*</sup>

<sup>a</sup>*Center for Molecular Science and Engineering, College of Sciences, Northeastern University, Shenyang 110819,  
China, E-mail: chenzhangpei@mail.neu.edu.cn*

<sup>b</sup>*School of Pharmacy and Pharmaceutical Science & Institute of Materia Medica, Shandong First Medical  
University & Shandong Academy of Medical Sciences, Jinan 250117, China, E-mail: baizhushuang@163.com*

<sup>c</sup>*School of Chemistry and Chemical Engineering, Shandong University, Jinan 250100, China, E-mail:  
yfliang@sdu.edu.cn*

### **Table of Contents**

|                                                        |            |
|--------------------------------------------------------|------------|
| <b>1. General remarks .....</b>                        | <b>S2</b>  |
| <b>2. General procedure .....</b>                      | <b>S2</b>  |
| <b>3. Optimization of the reaction conditions.....</b> | <b>S5</b>  |
| <b>4. Characterization data for all products .....</b> | <b>S7</b>  |
| <b>5. Mechanistic studies .....</b>                    | <b>S27</b> |
| <b>6. NMR Spectra for all the products .....</b>       | <b>S31</b> |

## 1. General remarks

$^1\text{H}$  NMR,  $^{13}\text{C}$  NMR data were obtained on AVANCE III Bruker 500 MHz nuclear resonance spectrometers unless otherwise noted. Chemical shifts (in ppm) were referenced to tetramethylsilane (TMS) ( $\delta = 0.00$  ppm) in  $\text{CDCl}_3$  or dimethyl sulfoxide ( $\delta = 2.50$  ppm) in  $\text{DMSO-d}_6$  as an internal standard. The data of  $^1\text{H}$  NMR was reported as follows: chemical shift, multiplicity (s = singlet, d = doublet, t = triplet, m = multiplet and br = broad), coupling constant (J values) in Hz and integration.  $^{13}\text{C}$  NMR spectra were obtained by the same NMR spectrometers and were calibrated with  $\text{CDCl}_3$  ( $\delta = 77.16$  ppm) or  $\text{DMSO-d}_6$  ( $\delta = 39.50$  ppm). Flash chromatography was performed using 300-400 mesh silica gel with the indicated eluent according to standard techniques. Analytical thin-layer chromatography (TLC) was performed on pre-coated, glass-backed silica gel plates. Analysis of crude reaction mixture was done on an Agilent 7890 GC System with an Agilent 5975 Mass Selective Detector. Visualization of the developed chromatogram was performed by UV absorbance (254 nm) unless otherwise noted. High-resolution mass spectral (HRMS) data were recorded on Bruker APEX IV Fourier transform ion cyclotron resonance mass spectrometer using electrospray ionization (ESI) mode.

## 2. General procedure

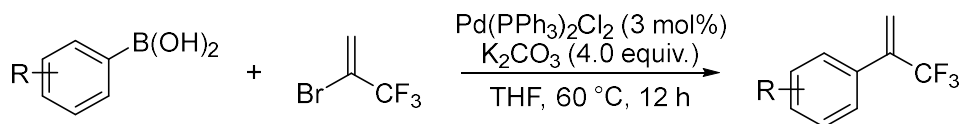

**General procedure for the synthesis of trifluoromethyl-substituted alkene 1:**<sup>1,2</sup> To a Schlenk tube equipped with stir bar, arylboronic acid (1.0 equiv., 3 mmol) and Pd(PPh<sub>3</sub>)<sub>2</sub>Cl<sub>2</sub> (3 mol%, 0.09 mmol, 63.2 mg) were added. The vessel was evacuated and filled with argon (three times), and then aqueous K<sub>2</sub>CO<sub>3</sub> (2.0 M, 6 mL) and THF (9 mL) were added. After addition of 2-bromo-3,3,3-trifluoro-1-propene (1.5 equiv., 4.5 mmol, 0.47 mL), the solution was stirred at 60 °C with heating mantle for 12 hours

(TLC tracking detection). The solvent was quenched with water, diluted with EtOAc (10 mL) and washed with brine (15 mL). The aqueous layer was extracted with EtOAc (3 x 10 mL). The combined organic layers were dried over Na<sub>2</sub>SO<sub>4</sub>, filtered and concentrated in vacuum and the residue was purified by column chromatography to afford the corresponding trifluoromethyl alkene.

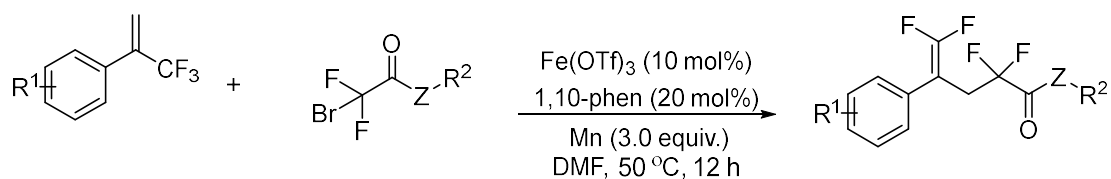

**General procedure for the Fe-catalysed reductive cross-coupling of Product 3:** To a 10 mL Schlenk tube was added sequentially Fe(OTf)<sub>3</sub> (10.07 mg, 0.02 mmol), 1,10-phenanthroline (6.80 mg, 0.04 mmol), Mn power (32.90 mg, 0.6 mmol). The vessel was evacuated and filled with argon (three times), DMF (0.20 mL) was added via syringe and the mixture was stirred at room temperature for 10 min. The trifluoromethyl-substituted alkene **1** (0.20 mmol) was added, followed by the bromodifluoroacetate **2** (0.40 mmol) in one portion. DMF (0.30 mL) was subsequently added via syringe. The resulting solution was stirred for 12 h at 50 °C. After this time, the crude reaction mixture was diluted with ethyl acetate (5 mL) and washed with water (2.0 mL × 3). The organic layer was dried over Na<sub>2</sub>SO<sub>4</sub>, filtered, and concentrated. The residue was purified by flash chromatography.

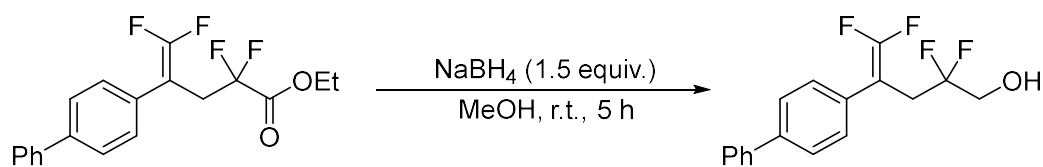

**General procedure for the Product 5:** To a 25mL round-bottomed flask ethyl 4-([1,1'-biphenyl]-4-yl)-2,2,5,5-tetrafluoropent-4-enoate **3aa** (1.0 mmol) was added, followed by methanol 10 mL in one portion. NaBH<sub>4</sub> (1.5 mmol) was subsequently added. The resulting solution was stirred for 5 h at room temperature. After this time, the crude reaction mixture was concentrated in vacuum and the residue was purified by column chromatography to afford the corresponding product.

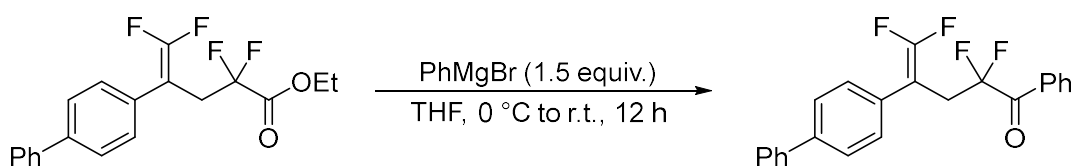

**General procedure for the Product 6:** To a 10 mL Schlenk tube was added ethyl 4-([1,1'-biphenyl]-4-yl)-2,2,5,5-tetrafluoropent-4-enoate **3aa** (0.2 mmol). The vessel was evacuated and filled with argon (three times), THF (0.50 mL) was added via syringe and the mixture was stirred at room temperature for 10 min. The phenylmagnesium bromide (0.3 mmol) was added under 0 °C. The resulting solution was stirred for 12 h at room temperature. After this time, the crude reaction mixture was diluted with ethyl acetate (5 mL) and washed with water (2.0 mL  $\times$  3). The organic layer was dried over Na<sub>2</sub>SO<sub>4</sub>, filtered, and concentrated. The residue was purified by flash chromatography.

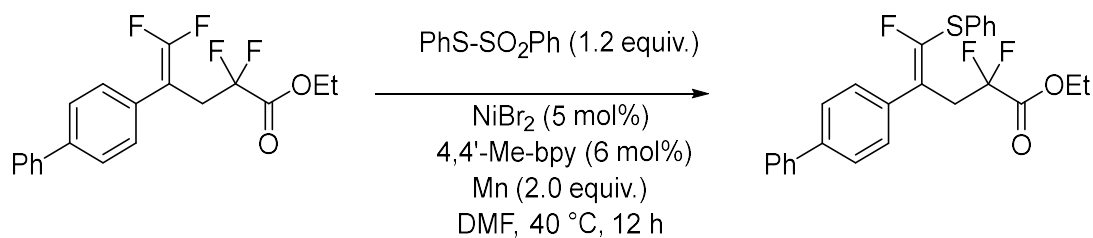

**General procedure for the Product 7:**<sup>3</sup> To a 10 mL Schlenk tube was added ethyl 4-([1,1'-biphenyl]-4-yl)-2,2,5,5-tetrafluoropent-4-enoate **3aa** (0.2 mmol), S-phenyl 4-methylbenzenesulfonothioate (0.24 mmol), NiBr<sub>2</sub> (2.2 mg, 0.01 mmol), 4,4'-dimethyl-2,2'-bipyridine (2.2 mg, 0.012 mmol) and Mn powder (22.0 mg, 0.4 mmol). DMF (0.5 mL) was added via syringe. The resulting solution was stirred for 12 h at 40 °C. After this time, the crude reaction mixture was diluted with ethyl acetate (100 mL) and washed with water (20 mL  $\times$  3). The organic layer was dried over Na<sub>2</sub>SO<sub>4</sub>, filtered, and concentrated. The residue was purified by flash chromatography.

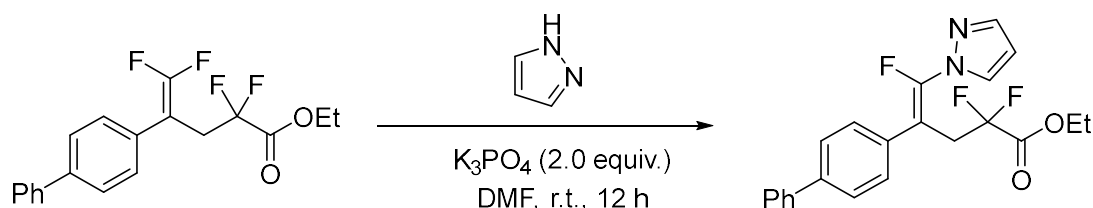

**General procedure for the Product 8:**<sup>4</sup> A solution of 1*H*-imidazole (1.0 mmol) in DMF (1 mL) was added dropwise to a mixture of ethyl 4-([1,1'-biphenyl]-4-yl)-2,2,5,5-tetrafluoropent-4-enoate **3aa** (1.2 mmol) and K<sub>3</sub>PO<sub>4</sub> (424.0 mg, 2.0 mmol) in DMF (1 mL) via syringe and then stirred at room temperature for 12 h (monitored by TLC). After completion of the reaction, the mixture was quenched with H<sub>2</sub>O (20 mL). The aqueous phase was extracted with CH<sub>2</sub>Cl<sub>2</sub> (3 × 10 mL). The organic layer was dried over MgSO<sub>4</sub> and filtered, and the filtrate was concentrated in vacuo. The crude product was purified by column chromatography on silica gel using a hexane/dichloromethane (10:1) mixture as eluent to afford the pure target compound.

### 3. Optimization of the reaction conditions

**Table S1.** Optimization of the catalysts

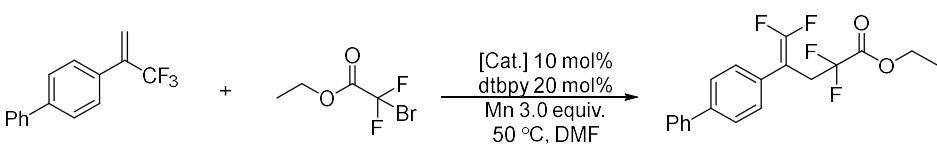

| entry | [Cat.]                 | yield |
|-------|------------------------|-------|
| 1     | NiCl <sub>2</sub>      | 16 %  |
| 2     | NiBr <sub>2</sub>      | 12 %  |
| 3     | NiI <sub>2</sub>       | 3 %   |
| 4     | NiBr <sub>2</sub> -DME | 31 %  |
| 5     | NiBr <sub>2</sub> -bpy | 6 %   |
| 6     | Ni(acac) <sub>2</sub>  | 3 %   |
| 7     | CoCl <sub>2</sub>      | 20 %  |
| 8     | CrCl <sub>3</sub>      | 13 %  |
| 9     | Fe(OTf) <sub>3</sub>   | 45 %  |
| 10    | FeCl <sub>3</sub>      | 41 %  |
| 11    | FeCl <sub>2</sub>      | 45 %  |
| 12    | Fe(acac) <sub>3</sub>  | 37 %  |
| 13    | dppf                   | 20 %  |
| 14    | Fe(OTf) <sub>3</sub>   | 49 %  |
| 15    | none                   | n.d.  |

**Table S2. Optimization of the ligands**

| entry | L   | yield |
|-------|-----|-------|
| 1     | L1  | 91 %  |
| 2     | L2  | 51 %  |
| 3     | L3  | 92 %  |
| 4     | L4  | 53 %  |
| 5     | L5  | 88 %  |
| 6     | L6  | 74 %  |
| 7     | L7  | 92 %  |
| 8     | L8  | 65 %  |
| 9     | L9  | 93 %  |
| 10    | L10 | 92 %  |
| 11    | L11 | 36 %  |
| 12    | L12 | 42 %  |
| 13    | L13 | 35 %  |
| 14    | L14 | 31 %  |
| 15    | L15 | trace |

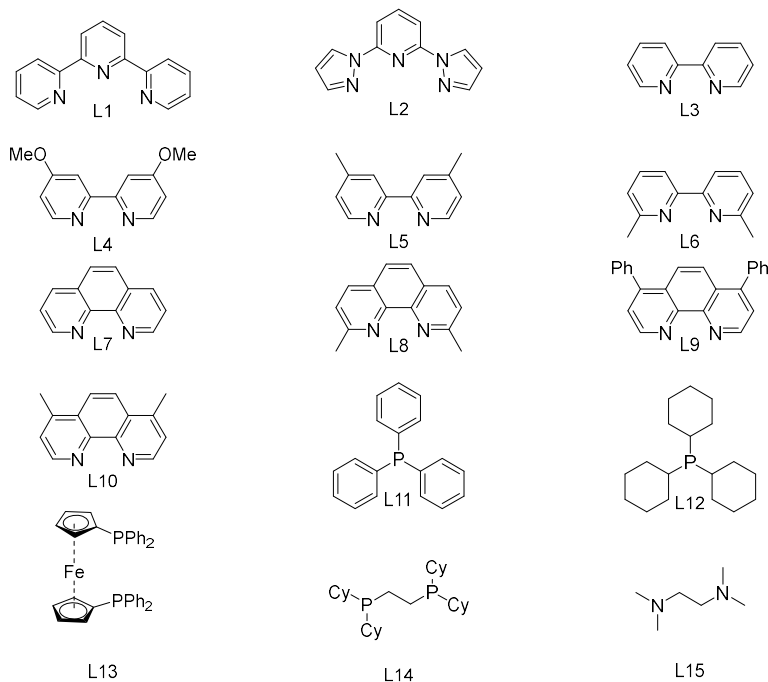

**Table S3. Optimization of reaction temperature**

| entry | Temp. | yield |
|-------|-------|-------|
| 1     | r.t.  | 57 %  |
| 2     | 35 °C | 60 %  |
| 3     | 50 °C | 92 %  |

**Table S4.** Optimization of the reducing agents
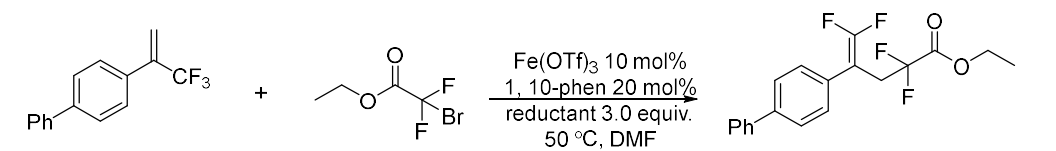

| entry | reductant                       | yield |
|-------|---------------------------------|-------|
| 1     | Mn                              | 92 %  |
| 2     | Zn                              | 56 %  |
| 3     | B <sub>2</sub> pin <sub>2</sub> | trace |

**Table S5.** Optimization of the solvents
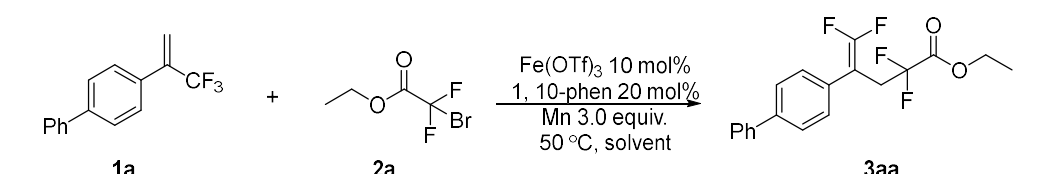

| entry          | solvent | yield |
|----------------|---------|-------|
| 1              | DMF     | 92 %  |
| 2              | DMA     | 87 %  |
| 3              | DMSO    | 88 %  |
| 4              | dioxane | 25 %  |
| 5              | toluene | n.d.  |
| 6              | MeCN    | 33 %  |
| 7              | THF     | 35 %  |
| 8              | DCE     | 7 %   |
| 9 <sup>a</sup> | DMF     | 65 %  |

Reaction conditions: **1a** (0.20 mmol), **2a** (0.40 mmol), catalyst (10 mol%), ligand (20 mol%), reducing agent (0.60 mmol), solvent (0.5 mL) for 12 h. Isolated yields.

<sup>a</sup>chlorodifluoroacetic ester was used instead of **2a**.

#### 4. Characterization data for all products

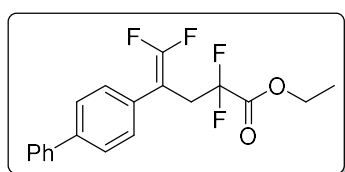

**Ethyl 4-([1,1'-biphenyl]-4-yl)-2,2,5,5-tetrafluoropent-4-enoate (3aa).** The

representative procedure was followed using 4-(3,3,3-trifluoroprop-1-en-2-yl)-1,1'-biphenyl (**1a**) (49.65 mg, 0.20 mmol) and ethyl 2-bromo-2,2-difluoroacetate (**2a**) (81.19 mg, 0.4 mmol). Isolation by column chromatography (hexane : EtOAc = 50 : 1) yielded **3aa** (64.8 mg, 92 %) as a white solid; <sup>1</sup>H NMR (500 MHz, CDCl<sub>3</sub>) δ 7.51 – 7.50 (m, 2H), 7.50 – 7.48 (m, 2H), 7.36 – 7.33 (m, 2H), 7.29 – 7.26 (m, 3H), 3.94 (q, *J* = 7.0 Hz, 2H), 3.18 – 3.12 (m, 2H), 1.10 (t, *J* = 7.0 Hz, 3H); <sup>13</sup>C NMR (125 MHz, CDCl<sub>3</sub>) δ 163.39 (t, *J* = 26.2 Hz), 155.37 (t, *J* = 232.0 Hz), 140.71, 140.28, 131.00, 128.87, 128.82, 127.55, 127.10, 126.97, 114.49 (t, *J* = 198.0 Hz), 84.60 (t, *J* = 16.3 Hz), 62.95, 33.92 (t, *J* = 20.5 Hz), 13.62; <sup>19</sup>F NMR (377 MHz, CDCl<sub>3</sub>) δ -86.19, -104.17; HRMS (ESI) *m/z* ([M+ H]<sup>+</sup>) Calcd. for C<sub>19</sub>H<sub>17</sub>F<sub>4</sub>O<sub>2</sub> 353.1159, found: 353.1156.

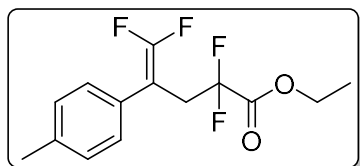

**Ethyl 2,2,5,5-tetrafluoro-4-(*p*-tolyl)pent-4-enoate (3ba).** The representative procedure was followed using 1-methyl-4-(3,3,3-trifluoroprop-1-en-2-yl)benzene (**1b**) (37.24 mg, 0.20 mmol) and ethyl 2-bromo-2,2-difluoroacetate (**2a**) (81.19 mg, 0.4 mmol). Isolation by column chromatography (hexane : EtOAc = 100 : 1) yielded **3ba** (53.9 mg, 90 %) as a colorless oil; <sup>1</sup>H NMR (500 MHz, CDCl<sub>3</sub>) δ 7.12 – 7.07 (m, 4H), 3.94 (q, *J* = 7.2 Hz, 2H), 3.14 – 3.07 (m, 2H), 2.26 (s, 3H), 1.11 (t, *J* = 7.2 Hz, 3H); <sup>13</sup>C NMR (125 MHz, CDCl<sub>3</sub>) δ 163.41 (t, *J* = 40.1 Hz), 155.21 (t, *J* = 362.5 Hz), 137.73, 129.14, 129.04, 128.32, 114.52 (t, *J* = 313.8 Hz), 84.63 (t, *J* = 24.5 Hz), 62.88, 34.02 (t, *J* = 31.8 Hz), 21.08, 13.60; <sup>19</sup>F NMR (377 MHz, CDCl<sub>3</sub>) δ -87.16, -104.25; HRMS (ESI) *m/z* ([M+ H]<sup>+</sup>) Calcd. for C<sub>14</sub>H<sub>15</sub>F<sub>4</sub>O<sub>2</sub> 291.1003, found: 291.1001.

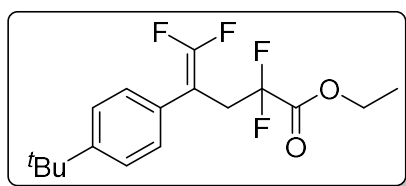

**Ethyl 4-(4-*tert*-butylphenyl)-2,2,5,5-tetrafluoropent-4-enoate (3ca).** The



representative procedure was followed using 1-(*tert*-butyl)-4-(3,3,3-trifluoroprop-1-en-2-yl)benzene (**1c**) (45.65 mg, 0.20 mmol) and ethyl 2-bromo-2,2-difluoroacetate (**2a**) (81.19 mg, 0.4 mmol). Isolation by column chromatography (hexane : EtOAc = 100 : 1) yielded **3ca** (67.7 mg, 87 %) as a colorless oil;  $^1\text{H NMR}$  (500 MHz,  $\text{CDCl}_3$ )  $\delta$  7.31 – 7.28 (m, 2H), 7.16 – 7.14 (m, 2H), 3.84 (q,  $J = 9.0$  Hz, 2H), 3.15 – 3.08 (m, 2H), 1.23 (s, 9H), 1.08 – 1.04 (t,  $J = 9.0$  Hz, 3H);  $^{13}\text{C NMR}$  (125 MHz,  $\text{CDCl}_3$ )  $\delta$  163.39 (t,  $J = 40.0$  Hz), 155.30 (t,  $J = 362.8$  Hz), 150.88, 128.93, 128.14, 125.37, 114.49 (t,  $J = 313.2$  Hz), 84.53 (t,  $J = 24.8$  Hz), 62.82, 34.54, 34.00 (t,  $J = 33.0$  Hz), 37.18, 13.58;  $^{19}\text{F NMR}$  (377 MHz,  $\text{CDCl}_3$ )  $\delta$  -86.96, -104.35; HRMS (ESI)  $m/z$  ( $[\text{M} + \text{Na}]^+$ ) Calcd. for  $\text{C}_{17}\text{H}_{20}\text{F}_4\text{O}_2\text{Na}$  355.1292, found: 355.1293.

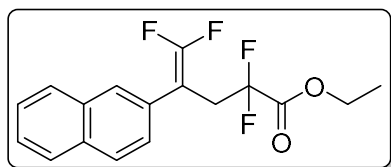

**Ethyl 2,2,5,5-tetrafluoro-4-(naphthalen-2-yl)pent-4-enoate (3da).** The representative procedure was followed using 2-(3,3,3-trifluoroprop-1-en-2-yl)naphthalene (**1d**) (44.44 mg, 0.20 mmol) and ethyl 2-bromo-2,2-difluoroacetate (**2a**) (81.19 mg, 0.4 mmol). Isolation by column chromatography (hexane : EtOAc = 50 : 1) yielded **3da** (47.0 mg, 72%) as a white solid;  $^1\text{H NMR}$  (500 MHz,  $\text{CDCl}_3$ )  $\delta$  7.71 – 7.65 (m, 4H), 7.37 – 7.28 (m, 3H), 3.78 (q,  $J = 7.0$  Hz, 2H), 3.23 – 3.20 (m, 2H), 0.96 (t,  $J = 7.0$  Hz, 3H);  $^{13}\text{C NMR}$  (125 MHz,  $\text{CDCl}_3$ )  $\delta$  163.36 (t,  $J = 25.6$  Hz), 155.52 (t,  $J = 232.6$  Hz), 133.05, 132.62, 129.43, 128.13, 127.89, 127.82, 127.55, 126.47, 126.44, 125.94, 114.52 (t,  $J = 201.1$  Hz), 84.99 (t,  $J = 16.0$  Hz), 62.85, 34.06 (t,  $J = 20.0$  Hz), 13.42;  $^{19}\text{F NMR}$  (377 MHz,  $\text{CDCl}_3$ )  $\delta$  -86.39, -104.10; HRMS (ESI)  $m/z$  ( $[\text{M} + \text{H}]^+$ ) Calcd. for  $\text{C}_{17}\text{H}_{15}\text{F}_4\text{O}_2$  327.1003, found: 327.1002.

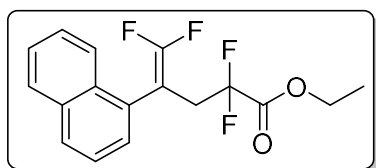

**Ethyl 2,2,5,5-tetrafluoro-4-(naphthalen-1-yl)pent-4-enoate (3ea).** The representative procedure was followed using 1-(3,3,3-trifluoroprop-1-en-2-yl)naphthalene (**1e**) (44.44 mg, 0.20 mmol) and ethyl 2-bromo-2,2-difluoroacetate (**2a**) (81.19 mg, 0.4 mmol). Isolation by column chromatography (hexane : EtOAc = 50 : 1) yielded **3ea** (45.7 mg, 70%) as a white solid;  $^1\text{H NMR}$  (500 MHz,  $\text{CDCl}_3$ )  $\delta$  7.78 – 7.71 (m, 3H), 7.46 – 7.30 (m, 4H), 3.83 – 3.71 (m, 2H), 3.29 – 3.16 (m, 2H), 0.91 (t,  $J = 7.0$  Hz, 3H);  $^{13}\text{C NMR}$  (125 MHz,  $\text{CDCl}_3$ )  $\delta$  163.21 (t,  $J = 32.3$  Hz), 155.34 (t,  $J = 287.6$  Hz), 133.76, 131.18, 129.42, 128.96, 128.66, 128.09, 126.62, 126.06, 125.22, 124.44, 114.52 (t,  $J = 250.8$  Hz), 82.73 (t,  $J = 23.8$  Hz), 62.80, 35.00 (t,  $J = 27.9$  Hz), 13.37;  $^{19}\text{F NMR}$  (377 MHz,  $\text{CDCl}_3$ )  $\delta$  -86.58, -104.24, -113.55; HRMS (ESI)  $m/z$  ( $[\text{M} + \text{H}]^+$ ) Calcd. for  $\text{C}_{17}\text{H}_{15}\text{F}_4\text{O}_2$  327.1003, found: 327.1001.

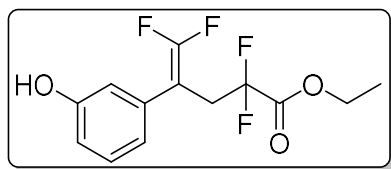

**Ethyl 2,2,5,5-tetrafluoro-4-(3-hydroxyphenyl)pent-4-enoate (3fa).** The representative procedure was followed using 3-(3,3,3-trifluoroprop-1-en-2-yl)phenol (**1f**) (37.63 mg, 0.20 mmol) and ethyl 2-bromo-2,2-difluoroacetate (**2a**) (81.19 mg, 0.4 mmol). Isolation by column chromatography (hexane : EtOAc = 10 : 1) yielded **3fa** (43.8 mg, 75%) as a yellow oil;  $^1\text{H NMR}$  (500 MHz,  $\text{CDCl}_3$ )  $\delta$  7.21 (m, 1H), 6.86 – 6.84 (m, 1H), 6.78 – 6.77 (m, 2H), 5.79 (s, 1H), 4.04 (q,  $J = 7.0$  Hz, 2H), 3.20 – 3.14 (m, 2H), 1.20 (t,  $J = 7.0$  Hz, 3H);  $^{13}\text{C NMR}$  (125 MHz,  $\text{CDCl}_3$ )  $\delta$  163.74 (t,  $J = 25.7$  Hz), 155.66, 155.32 (t,  $J = 232.6$  Hz), 133.54, 129.71, 120.81, 115.69, 115.05, 114.43 (t,  $J = 201.1$  Hz), 84.56 (t,  $J = 16.2$  Hz), 63.19, 33.93 (t,  $J = 20.6$  Hz), 13.54;  $^{19}\text{F NMR}$  (377 MHz,  $\text{CDCl}_3$ )  $\delta$  -85.89, -104.23; HRMS (ESI)  $m/z$  ( $[\text{M} + \text{H}]^+$ ) Calcd. for  $\text{C}_{13}\text{H}_{13}\text{F}_4\text{O}_3$  293.0795, found: 293.0794.

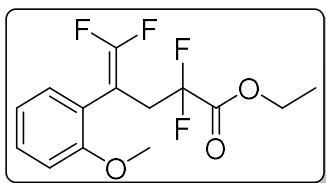

**Ethyl 2,2,5,5-tetrafluoro-4-(2-methoxyphenyl)pent-4-enoate (3ga).** The representative procedure was followed using 1-methoxy-2-(3,3,3-trifluoroprop-1-en-2-yl)benzene (**1g**) (40.44 mg, 0.20 mmol) and ethyl 2-bromo-2,2-difluoroacetate (**2a**) (81.19 mg, 0.4 mmol). Isolation by column chromatography (hexane : EtOAc = 10 : 1) yielded **3ga** (47.8 mg, 78%) as a colorless oil;  $^1\text{H NMR}$  (500 MHz,  $\text{CDCl}_3$ )  $\delta$  7.25 – 7.20 (m, 1H), 7.09 – 7.06 (m, 1H), 6.88 – 6.86 (m, 1H), 6.84 – 6.80 (m, 1H), 3.93 (q,  $J = 9.0$  Hz, 2H), 3.75 (s, 3H), 3.18 – 3.09 (m, 2H), 1.10 (t,  $J = 9.0$  Hz, 3H);  $^{13}\text{C NMR}$  (125 MHz,  $\text{CDCl}_3$ )  $\delta$  163.46 (t,  $J = 40.0$  Hz), 157.18, 155.06 (t,  $J = 359.4$  Hz), 131.55, 129.79, 120.44, 117.31, 114.81 (t,  $J = 179.0$  Hz), 110.73, 82.34 (t,  $J = 34.1$  Hz), 62.72, 55.36, 33.11 (t,  $J = 31.5$  Hz), 13.63;  $^{19}\text{F NMR}$  (377 MHz,  $\text{CDCl}_3$ )  $\delta$  -86.09, -89.20, -103.97.; **HRMS** (ESI)  $m/z$  ( $[\text{M}^+ \text{H}]^+$ ) Calcd. for  $\text{C}_{14}\text{H}_{15}\text{F}_4\text{O}_3$  307.0952, found: 307.0954.

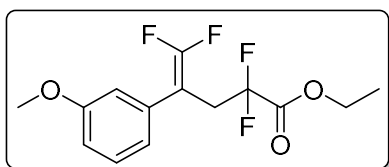

**Ethyl 2,2,5,5-tetrafluoro-4-(3-methoxyphenyl)pent-4-enoate (3ha).** The representative procedure was followed using 1-methoxy-3-(3,3,3-trifluoroprop-1-en-2-yl)benzene (**1h**) (40.44 mg, 0.20 mmol) and ethyl 2-bromo-2,2-difluoroacetate (**2a**) (81.19 mg, 0.4 mmol). Isolation by column chromatography (hexane : EtOAc = 10 : 1) yielded **3ha** (49.0 mg, 80%) as a colorless oil;  $^1\text{H NMR}$  (500 MHz,  $\text{CDCl}_3$ )  $\delta$  7.29 – 7.25 (m, 1H), 6.89 – 6.83 (m, 3H), 4.03 (q,  $J = 7.0$  Hz, 2H), 3.80 (s, 3H), 3.22 – 3.15 (m, 2H), 1.20 (t,  $J = 7.0$  Hz, 3H);  $^{13}\text{C NMR}$  (125 MHz,  $\text{CDCl}_3$ )  $\delta$  163.37 (t,  $J = 32.0$  Hz), 159.51, 155.30 (t,  $J = 290.5$  Hz), 133.41, 129.44, 120.83, 114.54 (t,  $J = 248.1$  Hz), 114.40, 113.29, 84.76 (t,  $J = 19.9$  Hz), 62.93, 55.23, 34.02 (t,  $J = 26.5$  Hz), 13.62;  $^{19}\text{F NMR}$  (377 MHz,  $\text{CDCl}_3$ )  $\delta$  -85.93, -86.41, -104.30; **HRMS** (ESI)  $m/z$  ( $[\text{M}^+ \text{H}]^+$ )

Calcd. for C<sub>14</sub>H<sub>15</sub>F<sub>4</sub>O<sub>3</sub> 307.0952, found: 307.0947.

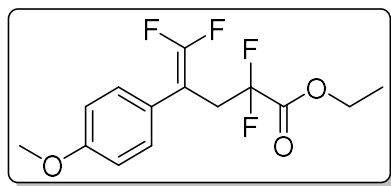

**Ethyl 2,2,5,5-tetrafluoro-4-(4-methoxyphenyl)pent-4-enoate (3ia).** The representative procedure was followed using 1-methoxy-4-(3,3,3-trifluoroprop-1-en-2-yl)benzene (**1i**) (40.44 mg, 0.20 mmol) and ethyl 2-bromo-2,2-difluoroacetate (**2a**) (81.19 mg, 0.4 mmol). Isolation by column chromatography (hexane : EtOAc = 10 : 1) yielded **3ia** (51.2 mg, 80%) as a colorless oil; <sup>1</sup>H NMR (500 MHz, CDCl<sub>3</sub>) δ 7.22 – 7.20 (m, 2H), 6.89 – 6.88 (m, 2H), 4.04 (q, *J* = 7.0 Hz, 2H), 3.80 (s, 3H), 3.19 – 3.13 (m, 2H), 1.20 (t, *J* = 7.0 Hz, 3H); <sup>13</sup>C NMR (125 MHz, CDCl<sub>3</sub>) δ 163.42 (t, *J* = 31.9 Hz), 159.16, 155.19 (t, *J* = 289.6 Hz), 129.69, 124.14, 114.54 (t, *J* = 251.6 Hz), 113.90, 84.33 (t, *J* = 20.4 Hz), 62.89, 55.22, 34.11 (t, *J* = 24.8 Hz), 13.64; <sup>19</sup>F NMR (377 MHz, CDCl<sub>3</sub>) δ -89.59, -106.17; HRMS (ESI) *m/z* ([M+ H]<sup>+</sup>) Calcd. for C<sub>14</sub>H<sub>15</sub>F<sub>4</sub>O<sub>3</sub> 307.0952, found: 307.0950.

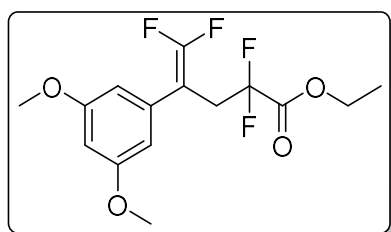

**Ethyl 4-(3,5-dimethoxyphenyl)-2,2,5,5-tetrafluoropent-4-enoate (3ja).** The representative procedure was followed using 1,3-dimethoxy-5-(3,3,3-trifluoroprop-1-en-2-yl)benzene (**1j**) (46.44 mg, 0.20 mmol) and ethyl 2-bromo-2,2-difluoroacetate (**2a**) (81.19 mg, 0.4 mmol). Isolation by column chromatography (hexane : EtOAc = 5 : 1) yielded **3ja** (57.2 mg, 85 %) as a white solid.; <sup>1</sup>H NMR (500 MHz, CDCl<sub>3</sub>) δ 6.36 – 6.35 (m, 2H), 6.33 – 6.31 (m, 1H), 4.00 (q, *J* = 9.0 Hz, 2H), 3.71 (s, 6H), 3.13 – 3.06 (m, 2H), 1.14 (t, *J* = 9.0 Hz, 3H); <sup>13</sup>C NMR (125 MHz, CDCl<sub>3</sub>) δ 163.40 (t, *J* = 40.5 Hz), 160.68, 155.31 (t, *J* = 362.9 Hz), 134.01, 114.41 (t, *J* = 315.1 Hz), 106.81, 99.86,

84.85 (t,  $J = 19.8$  Hz), 62.96, 55.34, 34.06 (t,  $J = 32.8$  Hz), 13.62;  $^{19}\text{F}$  NMR (377 MHz,  $\text{CDCl}_3$ )  $\delta$  -85.34, -86.27, -104.29; HRMS (ESI)  $m/z$  ( $[\text{M} + \text{H}]^+$ ) Calcd. for  $\text{C}_{15}\text{H}_{17}\text{F}_4\text{O}_4$  337.1057, found: 337.1056.

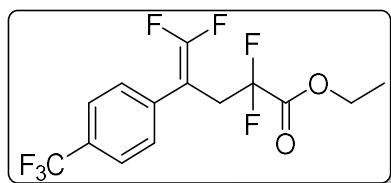

**Ethyl 2,2,5,5-tetrafluoro-4-(4-[trifluoromethyl]phenyl)pent-4-enoate (3ka).** The representative procedure was followed using 1-(trifluoromethyl)-4-(3,3,3-trifluoroprop-1-en-2-yl)benzene (**1k**) (48.03 mg, 0.20 mmol) and ethyl 2-bromo-2,2-difluoroacetate (**2a**) (81.19 mg, 0.4 mmol). Isolation by column chromatography (hexane : EtOAc = 20 : 1) yielded **3ka** (44.7 mg, 65 %) as a white solid.;  $^1\text{H}$  NMR (500 MHz,  $\text{CDCl}_3$ )  $\delta$  7.57 – 7.55 (m, 2H), 7.37 – 7.35 (m, 2H), 4.03 (q,  $J = 7.0$  Hz, 2H), 3.18 – 3.12 (m, 2H), 1.15 (t,  $J = 7.0$  Hz, 3H);  $^{13}\text{C}$  NMR (125 MHz,  $\text{CDCl}_3$ )  $\delta$  163.30 (t,  $J = 32.0$  Hz), 155.55 (t,  $J = 292.0$  Hz), 136.06, 129.91 (t,  $J = 33.8$  Hz), 128.88, 125.46, 124.93 (t,  $J = 270.4$  Hz), 114.28 (t,  $J = 251.4$  Hz), 84.31 (t,  $J = 23.1$  Hz), 63.12, 33.73 (t,  $J = 24.3$  Hz), 13.67;  $^{19}\text{F}$  NMR (377 MHz,  $\text{CDCl}_3$ )  $\delta$  -62.80, -84.77, -104.30; HRMS (ESI)  $m/z$  ( $[\text{M} + \text{H}]^+$ ) Calcd. for  $\text{C}_{14}\text{H}_{12}\text{F}_7\text{O}_2$  345.0720, found: 345.0721.

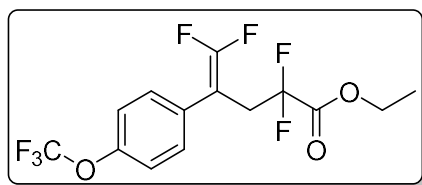

**Ethyl 2,2,5,5-tetrafluoro-4-(4-[trifluoromethoxy]phenyl)pent-4-enoate (3la).** The representative procedure was followed using 1-(trifluoromethoxy)-4-(3,3,3-trifluoroprop-1-en-2-yl)benzene (**1l**) (51.23 mg, 0.20 mmol) and ethyl 2-bromo-2,2-difluoroacetate (**2a**) (81.19 mg, 0.4 mmol). Isolation by column chromatography (hexane : EtOAc = 20 : 1) yielded **3la** (45.4 mg, 63 %) as a yellow solid.;  $^1\text{H}$  NMR (500 MHz,  $\text{CDCl}_3$ )  $\delta$  7.27 – 7.25 (m, 2H), 7.15 – 7.13 (m, 2H), 3.99 (q,  $J = 9.0$  Hz, 2H), 3.15 – 3.08 (m, 2H), 1.13 (t,  $J = 9.0$  Hz, 3H);  $^{13}\text{C}$  NMR (125 MHz,  $\text{CDCl}_3$ )  $\delta$

163.29 (t,  $J = 40.1$  Hz), 155.43 (t,  $J = 363.8$  Hz), 148.66, 130.87, 130.08, 121.68, 119.12 (t,  $J = 280.9$  Hz), 114.33 (t,  $J = 313.8$  Hz), 84.15 (t,  $J = 25.3$  Hz), 63.05, 33.96 (t,  $J = 32.0$  Hz), 13.63;  $^{19}\text{F}$  NMR (377 MHz,  $\text{CDCl}_3$ )  $\delta$  -57.92, -85.76, -104.33; HRMS (ESI)  $m/z$  ( $[\text{M} + \text{H}]^+$ ) Calcd. for  $\text{C}_{14}\text{H}_{12}\text{F}_7\text{O}_3$  361.0669, found: 361.0671.

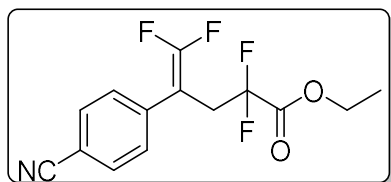

**Ethyl 4-(4-cyanophenyl)-2,2,5,5-tetrafluoropent-4-enoate (3ma).** The representative procedure was followed using 4-(3,3,3-trifluoroprop-1-en-2-yl)benzonitrile (**1m**) (39.43 mg, 0.20 mmol) and ethyl 2-bromo-2,2-difluoroacetate (**2a**) (81.19 mg, 0.4 mmol). Isolation by column chromatography (hexane : EtOAc = 10 : 1) yielded **3ma** (45.2 mg, 75 %) as a yellow solid.;  $^1\text{H}$  NMR (500 MHz,  $\text{CDCl}_3$ )  $\delta$  7.68 – 7.66 (m, 2H), 7.45 – 7.43 (m, 2H), 4.15 (q,  $J = 9.0$  Hz, 2H), 3.25 – 3.18 (m, 2H), 1.27 (t,  $J = 9.0$  Hz, 3H);  $^{13}\text{C}$  NMR (125 MHz,  $\text{CDCl}_3$ )  $\delta$  163.17 (t,  $J = 39.4$  Hz), 155.60 (t,  $J = 367.8$  Hz), 132.26, 131.77, 129.13, 118.31, 114.20 (t,  $J = 311.9$  Hz), 111.71, 84.34 (t,  $J = 41.3$  Hz), 63.21, 33.42 (t,  $J = 28.8$  Hz), 13.75;  $^{19}\text{F}$  NMR (377 MHz,  $\text{CDCl}_3$ )  $\delta$  -83.23, -83.60, -104.31; HRMS (ESI)  $m/z$  ( $[\text{M} + \text{H}]^+$ ) Calcd. for  $\text{C}_{14}\text{H}_{12}\text{F}_4\text{NO}_2$  302.0799, found: 302.0796.

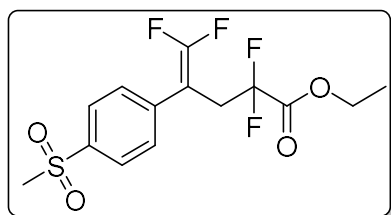

**Ethyl 2,2,5,5-tetrafluoro-4-(4-[methylsulfonyl]phenyl)pent-4-enoate (3na).** The representative procedure was followed using 1-(methylsulfonyl)-4-(3,3,3-trifluoroprop-1-en-2-yl)benzene (**1n**) (50.05 mg, 0.20 mmol) and ethyl 2-bromo-2,2-difluoroacetate (**2a**) (81.19 mg, 0.4 mmol). Isolation by column chromatography (hexane : EtOAc = 5 : 1) yielded **3na** (48.2 mg, 68 %) as a yellow solid.;  $^1\text{H}$  NMR (500

**MHz, CDCl<sub>3</sub>**)  $\delta$  7.95 – 7.94 (m, 2H), 7.53 – 7.52 (m, 2H), 4.18 (q,  $J = 9.0$  Hz, 2H), 3.27 – 3.20 (m, 2H), 3.07 (s, 3H), 1.27 (t,  $J = 9.0$  Hz, 3H); **<sup>13</sup>C NMR (125 MHz, CDCl<sub>3</sub>)**  $\delta$  163.13 (t,  $J = 31.8$  Hz), 155.60 (t,  $J = 293.0$  Hz), 139.80, 129.35, 127.57, 127.05, 114.17 (t,  $J = 251.0$  Hz), 84.20 (t,  $J = 21.8$  Hz), 63.20, 44.43, 33.72 (t,  $J = 25.3$  Hz), 13.71; **<sup>19</sup>F NMR (377 MHz, CDCl<sub>3</sub>)**  $\delta$  -83.25, -83.70, -104.17; **HRMS (ESI) m/z ([M+ H]<sup>+</sup>)** Calcd. for C<sub>14</sub>H<sub>15</sub>F<sub>4</sub>O<sub>4</sub>S 355.0622, found: 355.0624.

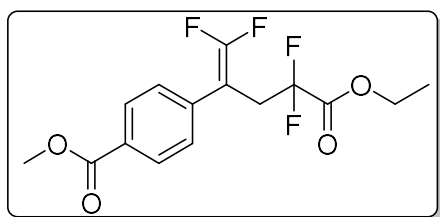

**Methyl 4-(5-ethoxy-1,1,4,4-tetrafluoro-5-oxopent-1-en-2-yl)benzoate (30a).** The representative procedure was followed using methyl 4-(3,3,3-trifluoroprop-1-en-2-yl)benzoate (**1o**) (46.04 mg, 0.20 mmol) and ethyl 2-bromo-2,2-difluoroacetate (**2a**) (81.19 mg, 0.4 mmol). Isolation by column chromatography (hexane : EtOAc = 10 : 1) yielded **30a** (46.8 mg, 70 %) as a white solid.; **<sup>1</sup>H NMR (500 MHz, CDCl<sub>3</sub>)**  $\delta$  7.98 – 7.95 (m, 2H), 7.33 – 7.30 (m, 2H), 4.00 (q,  $J = 9.0$  Hz, 2H), 3.85 (s, 3H), 3.19 – 3.12 (m, 2H), 1.15 (t,  $J = 9.0$  Hz, 3H); **<sup>13</sup>C NMR (125 MHz, CDCl<sub>3</sub>)**  $\delta$  166.50, 163.25 (t,  $J = 32.0$  Hz), 155.47 (t,  $J = 292.4$  Hz), 136.93, 129.91, 129.68, 128.40, 114.29 (t,  $J = 251.9$  Hz), 84.56 (t,  $J = 21.1$  Hz), 63.18, 52.24, 33.63 (t,  $J = 25.4$  Hz), 13.67; **<sup>19</sup>F NMR (377 MHz, CDCl<sub>3</sub>)**  $\delta$  -84.55, -104.30; **HRMS (ESI) m/z ([M+ H]<sup>+</sup>)** Calcd. for C<sub>15</sub>H<sub>15</sub>F<sub>4</sub>O<sub>4</sub>S 355.0901, found: 335.0899.

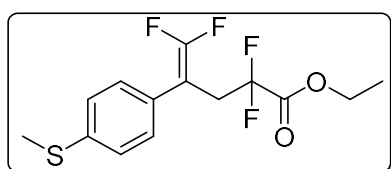

**Ethyl 2,2,5,5-tetrafluoro-4-(4-[methylthio]phenyl)pent-4-enoate (3pa).** The representative procedure was followed using methyl(4-[3,3,3-trifluoroprop-1-en-2-yl]phenyl)sulfane (**1p**) (43.65 mg, 0.20 mmol) and ethyl 2-bromo-2,2-difluoroacetate

(**2a**) (81.19 mg, 0.4 mmol). Isolation by column chromatography (hexane : EtOAc = 30 : 1) yielded **3pa** (60.6 mg, 94 %) as a yellow solid.;  $^1\text{H NMR}$  (500 MHz,  $\text{CDCl}_3$ )  $\delta$  7.23 – 7.21 (m, 4H), 4.04 (q,  $J = 9.0$  Hz, 2H), 3.22 – 3.14 (m, 2H), 2.48 (s, 3H), 1.21 (t,  $J = 9.0$  Hz, 3H);  $^{13}\text{C NMR}$  (125 MHz,  $\text{CDCl}_3$ )  $\delta$  163.36 (t,  $J = 40.5$  Hz), 155.25 (t,  $J = 363.0$  Hz), 138.57, 128.82, 128.79, 126.19, 114.44 (t,  $J = 314.1$  Hz), 84.37 (t,  $J = 25.0$  Hz), 62.96, 33.85 (t,  $J = 32.0$  Hz), 15.47, 13.65;  $^{19}\text{F NMR}$  (377 MHz,  $\text{CDCl}_3$ )  $\delta$  -86.47, -104.28; **HRMS** (ESI)  $m/z$  ( $[\text{M} + \text{H}]^+$ ) Calcd. for  $\text{C}_{14}\text{H}_{15}\text{F}_4\text{O}_2\text{S}$  323.0722, found: 323.0715.

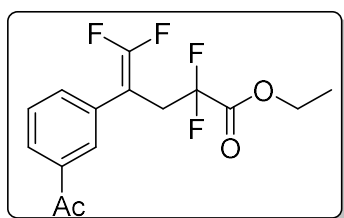

**Ethyl 4-(3-acetylphenyl)-2,2,5,5-tetrafluoropent-4-enoate (3qa).** The representative procedure was followed using 1-(3-[3,3,3-trifluoroprop-1-en-2-yl]phenyl)ethan-1-one (**1q**) (42.84 mg, 0.20 mmol) and ethyl 2-bromo-2,2-difluoroacetate (**2a**) (81.19 mg, 0.4 mmol). Isolation by column chromatography (hexane : EtOAc = 30 : 1) yielded **3qa** (51.9 mg, 79 %) as a white solid.;  $^1\text{H NMR}$  (500 MHz,  $\text{CDCl}_3$ )  $\delta$  7.92 – 7.88 (m, 2H), 7.53 – 7.45 (m, 2H), 4.08 (q,  $J = 9.0$  Hz, 2H), 3.29 – 3.20 (m, 2H), 2.61 (s, 3H), 1.21 (t,  $J = 9.0$  Hz, 3H);  $^{13}\text{C NMR}$  (125 MHz,  $\text{CDCl}_3$ )  $\delta$  197.38, 163.17 (t,  $J = 39.9$  Hz), 155.40 (t,  $J = 363.8$  Hz), 137.27, 133.05, 132.80, 128.76, 128.10, 127.78, 114.32 (t,  $J = 318.9$  Hz), 84.35 (t,  $J = 25.3$  Hz), 62.95, 33.76 (t,  $J = 31.6$  Hz), 26.45, 13.53;  $^{19}\text{F NMR}$  (377 MHz,  $\text{CDCl}_3$ )  $\delta$  -85.89, -104.26; **HRMS** (ESI)  $m/z$  ( $[\text{M} + \text{H}]^+$ ) Calcd. for  $\text{C}_{15}\text{H}_{15}\text{F}_4\text{O}_3$  319.0952, found: 319.0949.

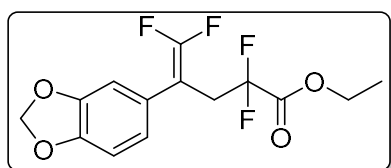

**Ethyl 4-(benzo[d][1,3]dioxol-5-yl)-2,2,5,5-tetrafluoropent-4-enoate (3ra).** The



representative procedure was followed using 5-(3,3,3-trifluoroprop-1-en-2-yl)benzo[d][1,3]dioxole (**1r**) (43.23 mg, 0.20 mmol) and ethyl 2-bromo-2,2-difluoroacetate (**2a**) (81.19 mg, 0.4 mmol). Isolation by column chromatography (hexane : EtOAc = 50 : 1) yielded **3ra** (53.2 mg, 83 %) as a white solid.; <sup>1</sup>H NMR (500 MHz, CDCl<sub>3</sub>) δ 6.73 – 6.66 (m, 3H), 5.89 (s, 2H), 4.04 (q, *J* = 9.0 Hz, 2H), 3.10 – 3.02 (m, 2H), 1.17 (t, *J* = 9.0 Hz, 3H); <sup>13</sup>C NMR (125 MHz, CDCl<sub>3</sub>) δ 163.38 (t, *J* = 32.0 Hz), 155.24 (t, *J* = 289.9 Hz), 147.70, 147.21, 125.64, 122.22, 114.46 (t, *J* = 251.1 Hz), 109.02, 108.26, 101.25, 84.58 (t, *J* = 20.8 Hz), 62.97, 34.24 (t, *J* = 25.5 Hz), 13.68; <sup>19</sup>F NMR (377 MHz, CDCl<sub>3</sub>) δ -86.80, -87.25, -104.22; HRMS (ESI) *m/z* ([*M*+ *H*]<sup>+</sup>) Calcd. for C<sub>14</sub>H<sub>13</sub>F<sub>4</sub>O<sub>4</sub> 321.0744, found: 321.0746.

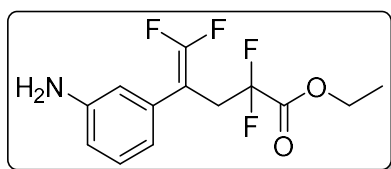

**Ethyl 4-(3-aminophenyl)-2,2,5,5-tetrafluoropent-4-enoate (3sa).** The representative procedure was followed using 3-(3,3,3-trifluoroprop-1-en-2-yl)aniline (**1s**) (37.43 mg, 0.20 mmol) and ethyl 2-bromo-2,2-difluoroacetate (**2a**) (81.19 mg, 0.4 mmol). Isolation by column chromatography (hexane : EtOAc = 5 : 1) yielded **3sa** (51.3 mg, 88 %) as a yellow oil.; <sup>1</sup>H NMR (500 MHz, CDCl<sub>3</sub>) δ 7.07 – 7.03 (m, 1H), 6.60 – 6.58 (m, 1H), 6.54 – 6.52 (m, 2H), 3.97 (q, *J* = 9.0 Hz, 2H), 3.81 – 3.16 (m, 2H), 3.13 – 3.04 (m, 2H), 1.13 (t, *J* = 9.0 Hz, 3H); <sup>13</sup>C NMR (125 MHz, CDCl<sub>3</sub>) δ 163.43 (t, *J* = 32.0 Hz), 155.21 (t, *J* = 290.1 Hz), 146.45 133.05, 129.32, 118.60, 115.14, 114.60, 114.43 (t, *J* = 251.3 Hz), 84.83 (t, *J* = 19.9 Hz), 62.93, 34.02 (t, *J* = 25.5 Hz), 13.64; <sup>19</sup>F NMR (377 MHz, CDCl<sub>3</sub>) δ -86.21, -86.91, -104.35; HRMS (ESI) *m/z* ([*M*+ *H*]<sup>+</sup>) Calcd. for C<sub>13</sub>H<sub>14</sub>F<sub>4</sub>NO<sub>2</sub> 292.0955, found: 292.0951.

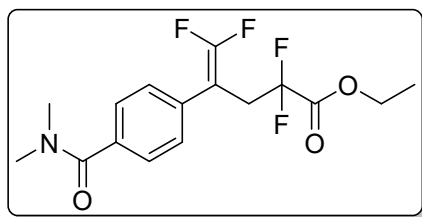

**Ethyl 4-(4-[dimethylcarbamoyl]phenyl)-2,2,5,5-tetrafluoropent-4-enoate (3ta).**

The representative procedure was followed using *N,N*-dimethyl-4-(3,3,3-trifluoroprop-1-en-2-yl)benzamide (**1t**) (48.65 mg, 0.20 mmol) and ethyl 2-bromo-2,2-difluoroacetate (**2a**) (81.19 mg, 0.4 mmol). Isolation by column chromatography (DCM : MeOH = 50 : 1) yielded **3ta** (59.7 mg, 86 %) as a yellow oil.; <sup>1</sup>H NMR (500 MHz, CDCl<sub>3</sub>) δ 7.36 – 7.34 (m, 2H), 7.30 – 7.26 (m, 2H), 4.04 (q, *J* = 9.0 Hz, 2H), 3.17 – 3.09 (m, 2H), 3.03 (s, 3H), 2.91 (s, 3H), 1.17 (t, *J* = 9.0 Hz, 3H); <sup>13</sup>C NMR (125 MHz, CDCl<sub>3</sub>) δ 170.83, 163.27 (t, *J* = 39.9 Hz), 155.38 (t, *J* = 364.3 Hz), 135.75, 133.51, 128.37, 127.25, 114.33 (t, *J* = 314.3 Hz), 84.46 (t, *J* = 25.3 Hz), 63.01, 39.44, 35.27, 33.71 (t, *J* = 29.0 Hz), 13.66; <sup>19</sup>F NMR (377 MHz, CDCl<sub>3</sub>) δ -85.45, -104.28; HRMS (ESI) *m/z* ([*M*+ *H*]<sup>+</sup>) Calcd. for C<sub>16</sub>H<sub>18</sub>F<sub>4</sub>NO<sub>3</sub> 348.1217, found: 348.1216.

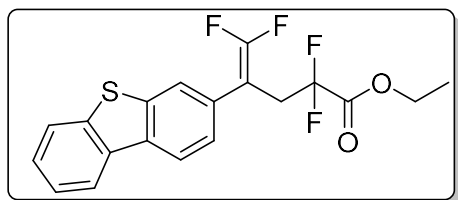

**Ethyl 4-(dibenzo[*b,d*]thiophen-3-yl)-2,2,5,5-tetrafluoropent-4-enoate (3ua).** The representative procedure was followed using 3-(3,3,3-trifluoroprop-1-en-2-yl)dibenzo[*b,d*]thiophene (**1u**) (55.66 mg, 0.20 mmol) and ethyl 2-bromo-2,2-difluoroacetate (**2a**) (81.19 mg, 0.4 mmol). Isolation by column chromatography (hexane : EtOAc = 30 : 1) yielded **3ua** (61.2 mg, 80 %) as a white solid.; <sup>1</sup>H NMR (500 MHz, CDCl<sub>3</sub>) δ 8.09 – 8.04 (m, 2H), 7.79 – 7.77 (m, 1H), 7.42 – 7.40 (m, 3H), 7.29 – 7.27 (m, 1H), 3.92 (q, *J* = 9.0 Hz, 2H), 3.32 – 3.25 (m, 2H), 1.00 (t, *J* = 9.0 Hz, 3H); <sup>13</sup>C NMR (125 MHz, CDCl<sub>3</sub>) δ 163.20 (t, *J* = 39.9 Hz), 155.41 (t, *J* = 362.8 Hz), 139.47, 138.92, 136.12, 135.53, 128.14, 127.09, 126.84, 124.73, 124.60, 122.75, 121.78, 121.54, 114.45 (t, *J* = 308.6 Hz), 83.69 (t, *J* = 27.8 Hz), 62.95, 33.01 (t, *J* = 31.9 Hz),

13.52;  $^{19}\text{F}$  NMR (377 MHz,  $\text{CDCl}_3$ )  $\delta$  -81.56, -86.31, -104.15; HRMS (ESI)  $m/z$  ( $[\text{M}^+ \text{H}]^+$ ) Calcd. for  $\text{C}_{19}\text{H}_{15}\text{F}_4\text{O}_2\text{S}$  383.0723, found: 383.0726.

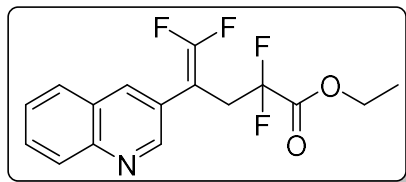

**Ethyl 2,2,5,5-tetrafluoro-4-(quinolin-3-yl)pent-4-enoate (3va).** The representative procedure was followed using 3-(3,3,3-trifluoroprop-1-en-2-yl)quinoline (**1v**) (44.64 mg, 0.20 mmol) and ethyl 2-bromo-2,2-difluoroacetate (**2a**) (81.19 mg, 0.4 mmol). Isolation by column chromatography (hexane : EtOAc = 20 : 1) yielded **3va** (50.4 mg, 77 %) as a yellow oil.;  $^1\text{H}$  NMR (500 MHz,  $\text{CDCl}_3$ )  $\delta$  8.87 – 8.86 (m, 1H), 8.12 – 8.09 (m, 2H), 7.84 – 7.82 (m, 1H), 7.76 – 7.73 (m, 1H), 7.60 – 7.57 (m, 1H), 4.07 (q,  $J$  = 7.5 Hz, 2H), 3.36 – 3.29 (m, 2H), 1.19 (t,  $J$  = 7.5 Hz, 3H);  $^{13}\text{C}$  NMR (125 MHz,  $\text{CDCl}_3$ )  $\delta$  163.25 (t,  $J$  = 32.1 Hz), 155.88 (t,  $J$  = 292.1 Hz), 149.86, 147.12, 135.55, 130.10, 129.14, 127.82, 127.38, 127.28, 125.53, 114.33 (t,  $J$  = 252.2 Hz), 82.70 (t,  $J$  = 33.4 Hz), 63.18, 33.75 (t,  $J$  = 23.4 Hz), 13.65;  $^{19}\text{F}$  NMR (377 MHz,  $\text{CDCl}_3$ )  $\delta$  -84.71, -84.78, -104.11; HRMS (ESI)  $m/z$  ( $[\text{M}^+ \text{H}]^+$ ) Calcd. for  $\text{C}_{16}\text{H}_{14}\text{F}_4\text{NO}_2$  328.0955, found: 328.0958.

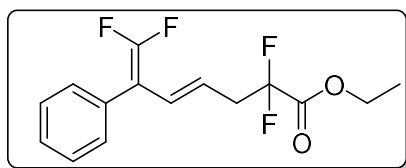

**Ethyl (E)-2,2,7,7-tetrafluoro-6-phenylhepta-4,6-dienoate (3wa).** The representative procedure was followed using (Z)-(1,1,1-trifluoropenta-2,4-dien-2-yl)benzene (**1w**) (39.64 mg, 0.20 mmol) and ethyl 2-bromo-2,2-difluoroacetate (**2a**) (81.19 mg, 0.4 mmol). Isolation by column chromatography (hexane : EtOAc = 50 : 1) yielded **3wa** (39.3 mg, 65 %) as a colorless oil.;  $^1\text{H}$  NMR (500 MHz,  $\text{CDCl}_3$ )  $\delta$  7.33 – 7.30 (m, 2H), 7.29 – 7.27 (m, 1H), 7.16 – 7.15 (m, 2H), 6.40 – 6.36 (m, 1H), 5.23 – 5.17 (m, 1H), 4.22 (q,  $J$  = 9.0 Hz, 2H), 2.83 – 2.76 (m, 2H), 1.22 (t,  $J$  = 9.0 Hz, 3H);  $^{13}\text{C}$  NMR (125

**MHz, CDCl<sub>3</sub>**)  $\delta$  163.71 (t,  $J = 32.3$  Hz), 153.85 (t,  $J = 291.3$  Hz), 130.60, 129.98, 128.81, 128.63, 128.54, 128.13, 115.03 (t,  $J = 250.0$  Hz), 95.34 (t,  $J = 16.1$  Hz), 62.83, 38.40 (t,  $J = 24.3$  Hz), 13.85; **<sup>19</sup>F NMR (377 MHz, CDCl<sub>3</sub>)**  $\delta$  -88.65, -89.05, -105.37; **HRMS (ESI) m/z ([M+ Na]<sup>+</sup>)** Calcd. for C<sub>15</sub>H<sub>14</sub>F<sub>4</sub>O<sub>2</sub>Na 325.0822, found: 325.0829.

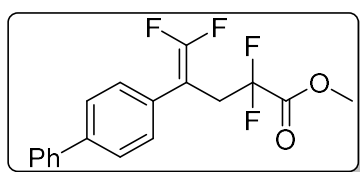

**Methyl 4-([1,1'-biphenyl]-4-yl)-2,2,5,5-tetrafluoropent-4-enoate (3ab).** The representative procedure was followed using 4-(3,3,3-trifluoroprop-1-en-2-yl)-1,1'-biphenyl (**1a**) (49.65 mg, 0.20 mmol) and methyl 2-bromo-2,2-difluoroacetate (**2b**) (75.58 mg, 0.4 mmol). Isolation by column chromatography (hexane : EtOAc = 50 : 1) yielded **3ab** (49.4 mg, 73 %) as a white solid.; **<sup>1</sup>H NMR (500 MHz, CDCl<sub>3</sub>)**  $\delta$  7.61 – 7.58 (m, 4H), 7.47 – 7.43 (m, 2H), 7.38 – 7.36 (m, 3H), 3.58 (s, 3H), 3.29 – 3.20 (m, 2H); **<sup>13</sup>C NMR (125 MHz, CDCl<sub>3</sub>)**  $\delta$  163.83 (t,  $J = 32.4$  Hz), 155.39 (t,  $J = 291.0$  Hz), 140.69, 140.23, 135.35, 132.05, 130.87, 128.84, 127.59, 127.11, 126.98, 114.44 (t,  $J = 254.3$  Hz), 84.47 (t,  $J = 19.4$  Hz), 53.18; **<sup>19</sup>F NMR (377 MHz, CDCl<sub>3</sub>)**  $\delta$  -86.15, -104.41; **HRMS (ESI) m/z ([M+ H]<sup>+</sup>)** Calcd. for C<sub>18</sub>H<sub>15</sub>F<sub>4</sub>O<sub>2</sub> 339.1003, found: 339.1002.

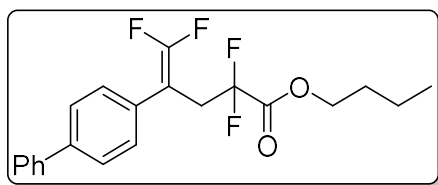

**Butyl 4-([1,1'-biphenyl]-4-yl)-2,2,5,5-tetrafluoropent-4-enoate (3ac).** The representative procedure was followed using 4-(3,3,3-trifluoroprop-1-en-2-yl)-1,1'-biphenyl (**1a**) (49.65 mg, 0.20 mmol) and butyl 2-bromo-2,2-difluoroacetate (**2c**) (92.42 mg, 0.4 mmol). Isolation by column chromatography (hexane : EtOAc = 50 : 1) yielded **3ac** (67.7 mg, 89 %) as a white solid.; **<sup>1</sup>H NMR (500 MHz, CDCl<sub>3</sub>)**  $\delta$  7.60 – 7.57 (m, 4H), 7.45 – 7.42 (m, 2H), 7.38 – 7.35 (m, 3H), 3.97 (t,  $J = 7.0$  Hz, 2H), 3.26 – 3.20 (m, 2H), 1.57 – 1.52 (m, 2H), 1.35 – 1.27 (m, 2H), 0.88 (t,  $J = 7.0$  Hz, 3H); **<sup>13</sup>C**

**NMR (125 MHz, CDCl<sub>3</sub>)**  $\delta$  163.50 (t,  $J$  = 32.1 Hz), 155.37 (t,  $J$  = 290.8 Hz), 140.67, 140.26, 131.03, 128.85, 128.82, 127.55, 127.11, 126.97, 114.52 (t,  $J$  = 241.3 Hz), 84.56 (t,  $J$  = 19.8 Hz), 66.77, 33.94 (t,  $J$  = 24.1 Hz), 30.07, 18.84, 13.54; **<sup>19</sup>F NMR (377 MHz, CDCl<sub>3</sub>)**  $\delta$  -86.12, -104.15; **HRMS (ESI) m/z ([M+ H]<sup>+</sup>)** Calcd. for C<sub>21</sub>H<sub>21</sub>F<sub>4</sub>O<sub>2</sub> 381.1472, found: 381.1475.

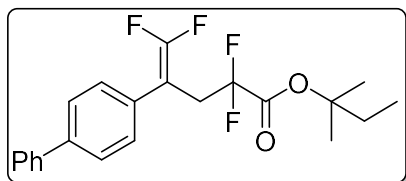

**tert-pentyl 4-([1,1'-biphenyl]-4-yl)-2,2,5,5-tetrafluoropent-4-enoate (3ad).** The representative procedure was followed using 4-(3,3,3-trifluoroprop-1-en-2-yl)-1,1'-biphenyl (**1a**) (49.65 mg, 0.20 mmol) and *tert*-pentyl 2-bromo-2,2-difluoroacetate (**2d**) (98.02 mg, 0.4 mmol). Isolation by column chromatography (hexane : EtOAc = 30 : 1) yielded **3ad** (48.1 mg, 61 %) as a white solid.; **<sup>1</sup>H NMR (500 MHz, CDCl<sub>3</sub>)**  $\delta$  7.51 – 7.49 (m, 4H), 7.38 – 7.35 (m, 2H), 7.32 – 7.28 (m, 3H), 3.15 – 3.09 (m, 2H), 1.65 (q,  $J$  = 7.5 Hz, 2H), 1.27 (s, 6H), 0.78 (t,  $J$  = 7.5 Hz, 3H); **<sup>13</sup>C NMR (125 MHz, CDCl<sub>3</sub>)**  $\delta$  162.25 (t,  $J$  = 31.4 Hz), 155.30 (t,  $J$  = 290.6 Hz), 140.70, 140.42, 131.28, 128.86, 128.80, 127.48, 127.19, 127.02, 114.47 (t,  $J$  = 242.3 Hz), 87.38, 84.80 (t,  $J$  = 19.8 Hz), 33.68 (t,  $J$  = 26.1 Hz), 33.28, 24.77, 8.04; **<sup>19</sup>F NMR (377 MHz, CDCl<sub>3</sub>)**  $\delta$  -85.86, -86.50, -103.38; **HRMS (ESI) m/z ([M+ Na]<sup>+</sup>)** Calcd. for C<sub>22</sub>H<sub>22</sub>F<sub>4</sub>O<sub>2</sub>Na 417.1488, found: 417.1489.

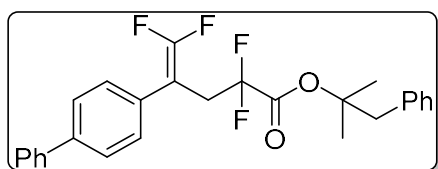

**2-methyl-1-phenylpropan-2-yl 4-([1,1'-biphenyl]-4-yl)-2,2,5,5-tetrafluoropent-4-enoate (3ae).** The representative procedure was followed using 4-(3,3,3-trifluoroprop-1-en-2-yl)-1,1'-biphenyl (**1a**) (49.65 mg, 0.20 mmol) and 2-methyl-1-phenylpropan-2-yl 2-bromo-2,2-difluoroacetate (**2e**) (122.85 mg, 0.4 mmol). Isolation by column

chromatography (hexane : EtOAc = 20 : 1) yielded **3ae** (48.4 mg, 58 %) as a white solid.;  $^1\text{H NMR}$  (500 MHz,  $\text{CDCl}_3$ )  $\delta$  7.47 – 7.41 (m, 4H), 7.36 – 7.33 (m, 2H), 7.27 – 7.25 (m, 1H), 7.24 – 7.16 (m, 5H), 7.08 – 7.06 (m, 2H), 3.09 – 3.03 (m, 2H), 2.84 (s, 2H), 1.24 (s, 6H);  $^{13}\text{C NMR}$  (125 MHz,  $\text{CDCl}_3$ )  $\delta$  162.26 (t,  $J = 31.6$  Hz), 155.33 (t,  $J = 290.8$  Hz), 140.62, 140.36, 136.15, 130.65, 128.84, 128.81, 128.78, 128.04, 127.47, 127.15, 126.98, 126.79, 114.35 (t,  $J = 250.8$  Hz), 86.34, 84.66 (t,  $J = 19.5$  Hz), 46.97, 36.63 (t,  $J = 25.4$  Hz), 24.86;  $^{19}\text{F NMR}$  (377 MHz,  $\text{CDCl}_3$ )  $\delta$  -85.85, -86.41, -103.73; **HRMS** (ESI)  $m/z$  ( $[\text{M} + \text{Na}]^+$ ) Calcd. for  $\text{C}_{27}\text{H}_{24}\text{F}_4\text{O}_2\text{Na}$  479.1605, found: 479.1604.

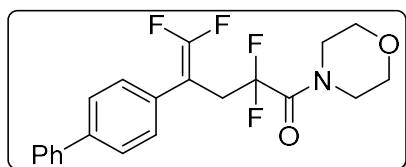

**4-((1,1'-biphenyl)-4-yl)-2,2,5,5-tetrafluoro-1-morpholinopent-4-en-1-one (3af).**

The representative procedure was followed using 4-(3,3,3-trifluoroprop-1-en-2-yl)-1,1'-biphenyl (**1a**) (49.65 mg, 0.20 mmol) and 2-bromo-2,2-difluoro-1-morpholinoethan-1-one (**2f**) (97.62 mg, 0.4 mmol). Isolation by column chromatography (hexane : EtOAc = 10 : 1) yielded **3af** (63.7 mg, 81 %) as a white solid.;  $^1\text{H NMR}$  (500 MHz,  $\text{CDCl}_3$ )  $\delta$  7.60 – 7.58 (m, 4H), 7.45 – 7.40 (m, 4H), 7.36 – 7.33 (m, 1H), 3.69 – 3.58 (m, 8H), 3.41 – 3.33 (m, 2H);  $^{13}\text{C NMR}$  (125 MHz,  $\text{CDCl}_3$ )  $\delta$  161.47 (t,  $J = 28.6$  Hz), 155.29 (t,  $J = 290.4$  Hz), 140.32, 140.31, 132.17, 128.76, 128.57, 127.43, 127.05, 126.96, 117.89 (t,  $J = 255.1$  Hz), 84.83 (t,  $J = 19.8$  Hz), 66.62, 66.57, 46.34, 43.29, 33.43 (t,  $J = 22.8$  Hz);  $^{19}\text{F NMR}$  (377 MHz,  $\text{CDCl}_3$ )  $\delta$  -86.36, -98.73; **HRMS** (ESI)  $m/z$  ( $[\text{M} + \text{H}]^+$ ) Calcd. for  $\text{C}_{21}\text{H}_{20}\text{F}_4\text{NO}_2$  394.1425, found: 394.1429.

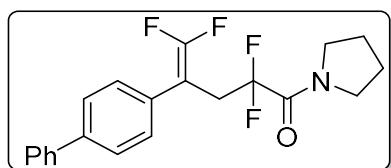

**4-((1,1'-biphenyl)-4-yl)-2,2,5,5-tetrafluoro-1-(pyrrolidin-1-yl)pent-4-en-1-one**

**(3ag).** The representative procedure was followed using 4-(3,3,3-trifluoroprop-1-en-2-yl)-1,1'-biphenyl (**1a**) (49.65 mg, 0.20 mmol) and 2-bromo-2,2-difluoro-1-(pyrrolidin-1-yl)ethan-1-one (**2g**) (91.22 mg, 0.4 mmol). Isolation by column chromatography (hexane : EtOAc = 30 : 1) yielded **3ag** (57.4 mg, 76 %) as a white solid.;  $^1\text{H NMR}$  (500 MHz,  $\text{CDCl}_3$ )  $\delta$  7.60 – 7.57 (m, 4H), 7.45 – 7.41 (m, 4H), 7.36 – 7.33 (m, 1H), 3.60 – 3.56 (m, 2H), 3.41 – 3.31 (m, 4H), 1.86 (q,  $J = 7.0$  Hz, 2H), 1.76 (q,  $J = 7.0$  Hz, 2H);  $^{13}\text{C NMR}$  (125 MHz,  $\text{CDCl}_3$ )  $\delta$  161.60 (t,  $J = 29.0$  Hz), 155.26 (t,  $J = 290.4$  Hz), 140.30, 140.26, 131.86, 128.76, 128.58, 127.42, 126.98, 126.94, 117.30 (t,  $J = 254.0$  Hz), 84.98 (t,  $J = 20.9$  Hz), 47.37, 46.45, 33.15 (t,  $J = 24.3$  Hz), 26.36, 23.12;  $^{19}\text{F NMR}$  (377 MHz,  $\text{CDCl}_3$ )  $\delta$  -86.50, -102.03; **HRMS** (ESI)  $m/z$  ( $[\text{M}^+ \text{H}]^+$ ) Calcd. for  $\text{C}_{21}\text{H}_{20}\text{F}_4\text{NO}$  378.1476, found: 378.1472.

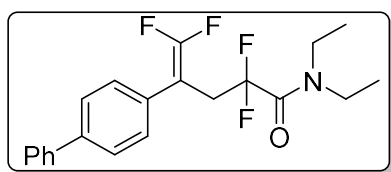

**4-((1,1'-biphenyl)-4-yl)-*N,N*-diethyl-2,2,5,5-tetrafluoropent-4-enamide (3ah).** The representative procedure was followed using 4-(3,3,3-trifluoroprop-1-en-2-yl)-1,1'-biphenyl (**1a**) (49.65 mg, 0.20 mmol) and 2-bromo-*N,N*-diethyl-2,2-difluoroacetamide (**2h**) (92.02 mg, 0.4 mmol). Isolation by column chromatography (hexane : EtOAc = 20 : 1) yielded **3ah** (54.6 mg, 76 %) as a white solid.;  $^1\text{H NMR}$  (500 MHz,  $\text{CDCl}_3$ )  $\delta$  7.52 – 7.50 (m, 4H), 7.37 – 7.33 (m, 4H), 7.28 – 7.25 (m, 1H), 3.37 (q,  $J = 7.0$  Hz, 2H), 3.33 – 3.28 (m, 2H), 3.26 (q,  $J = 7.0$  Hz, 2H), 1.08 (t,  $J = 7.0$  Hz, 3H), 1.03 (t,  $J = 7.0$  Hz, 3H);  $^{13}\text{C NMR}$  (125 MHz,  $\text{CDCl}_3$ )  $\delta$  162.28 (t,  $J = 28.4$  Hz), 155.27 (t,  $J = 289.9$  Hz), 140.41, 140.20, 132.27, 128.75, 128.60, 127.38, 127.02, 126.97, 118.04 (t,  $J = 252.6$  Hz), 85.13 (t,  $J = 18.6$  Hz), 41.71, 41.47, 33.58 (t,  $J = 23.5$  Hz), 14.17, 12.16;  $^{19}\text{F NMR}$  (377 MHz,  $\text{CDCl}_3$ )  $\delta$  -86.55, -99.39; **HRMS** (ESI)  $m/z$  ( $[\text{M}^+ \text{H}]^+$ ) Calcd. for  $\text{C}_{21}\text{H}_{22}\text{F}_4\text{NO}$  380.1632, found: 380.1637.

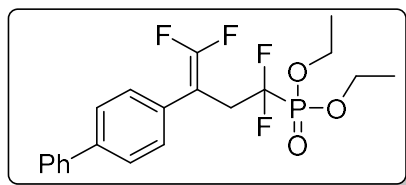

**Diethyl (3-([1,1'-biphenyl]-4-yl)-1,1,4,4-tetrafluorobut-3-en-1-yl)phosphonate**

**(3ai).** The representative procedure was followed using 4-(3,3,3-trifluoroprop-1-en-2-yl)-1,1'-biphenyl (**1a**) (49.65 mg, 0.20 mmol) and diethyl (bromodifluoromethyl)phosphonate (**2i**) (106.80 mg, 0.4 mmol). Isolation by column chromatography (hexane : EtOAc = 20 : 1) yielded **3ai** (66.6 mg, 80 %) as a yellow solid.;  $^1\text{H NMR}$  (500 MHz,  $\text{CDCl}_3$ )  $\delta$  7.60 – 7.58 (m, 4H), 7.44 – 7.41 (m, 4H), 7.36 – 7.33 (m, 1H), 4.27 – 4.23 (m, 4H), 3.26 – 3.19 (m, 2H), 1.38 – 1.35 (m, 6H);  $^{13}\text{C NMR}$  (125 MHz,  $\text{CDCl}_3$ )  $\delta$  155.32 (t,  $J = 290.4$  Hz), 140.40, 140.33, 131.98, 128.76, 128.59, 127.42, 127.06, 126.99, 84.31 (t,  $J = 21.1$  Hz), 64.67, 64.62, 32.80 (q,  $J = 21.0$  Hz), 16.34;  $^{19}\text{F NMR}$  (377 MHz,  $\text{CDCl}_3$ )  $\delta$  -85.64, -86.01, -110.61;  $^{31}\text{P NMR}$  (162 MHz,  $\text{CDCl}_3$ )  $\delta$  6.45 (t,  $J = 84.4$  Hz); **HRMS** (ESI)  $m/z$  ( $[\text{M}^+ \text{H}]^+$ ) Calcd. for  $\text{C}_{20}\text{H}_{22}\text{F}_4\text{O}_3\text{P}$  417.1237, found: 417.1239.

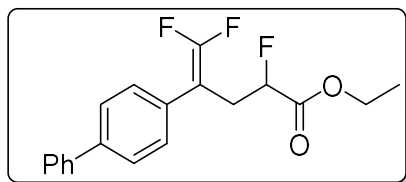

**Ethyl 4-([1,1'-biphenyl]-4-yl)-2,5,5-trifluoropent-4-enoate (3aj).** The representative procedure was followed using 4-(3,3,3-trifluoroprop-1-en-2-yl)-1,1'-biphenyl (**1a**) (49.65 mg, 0.20 mmol) and ethyl 2-bromo-2-fluoroacetate (**2j**) (74.00 mg, 0.4 mmol). Isolation by column chromatography (hexane : EtOAc = 50 : 1) yielded **3aj** (38.8 mg, 58 %) as a white solid.;  $^1\text{H NMR}$  (500 MHz,  $\text{CDCl}_3$ )  $\delta$  7.54 – 7.50 (m, 4H), 7.39 – 7.33 (m, 4H), 7.28 (m, 1H), 4.86 – 4.74 (m, 1H), 4.08 – 4.00 (m, 2H), 3.00 – 2.93 (m, 2H), 1.16 (m, 3H);  $^{13}\text{C NMR}$  (125 MHz,  $\text{CDCl}_3$ )  $\delta$  167.92 (d,  $J = 23.25$  Hz), 153.74 (t,  $J = 289.0$  Hz), 139.65, 139.32, 129.99, 127.85, 127.82, 126.52, 126.27, 125.99, 86.13 (t,  $J = 19.06$  Hz), 84.68, 60.72, 30.35 (d,  $J = 22.63$  Hz), 12.97;  $^{19}\text{F NMR}$  (377 MHz,  $\text{CDCl}_3$ )  $\delta$  -87.76, -191.04; **HRMS** (ESI)  $m/z$  ( $[\text{M}^+ \text{H}]^+$ ) Calcd. for  $\text{C}_{19}\text{H}_{18}\text{F}_3\text{O}_2$



335.1253, found: 335.1258.

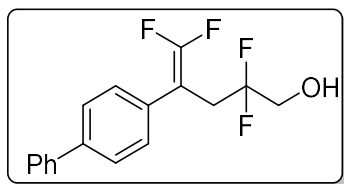

**4-([1,1'-biphenyl]-4-yl)-2,2,5,5-tetrafluoropent-4-en-1-ol (5).** The representative procedure was followed using ethyl 4-([1,1'-biphenyl]-4-yl)-2,2,5,5-tetrafluoropent-4-enoate (**3aa**) (352.33 mg, 1.0 mmol) and NaBH<sub>4</sub> (56.75 mg, 1.5 mmol). Isolation by column chromatography (hexane : EtOAc = 5 : 1) yielded **5** (285.29 mg, 92 %) as a white solid.; <sup>1</sup>H NMR (500 MHz, CDCl<sub>3</sub>) δ 7.51 – 7.49 (m, 4H), 7.36 – 7.32 (m, 4H), 7.27 – 7.24 (m, 1H), 3.58 – 3.53 (m, 2H), 3.04 – 2.97 (m, 2H), 1.91 (s, 1H); <sup>13</sup>C NMR (125 MHz, CDCl<sub>3</sub>) δ 155.21 (t, *J* = 290.2 Hz), 140.46, 140.25, 131.86, 128.79, 128.56, 127.50, 127.18, 126.97, 121.92 (t, *J* = 242.9 Hz), 85.50 (t, *J* = 20.9 Hz), 63.63 (t, *J* = 31.1 Hz), 32.19 (t, *J* = 25.6 Hz); <sup>19</sup>F NMR (377 MHz, CDCl<sub>3</sub>) δ -86.48, -87.03, -106.07; HRMS (ESI) *m/z* ([M+ H]<sup>+</sup>) Calcd. for C<sub>17</sub>H<sub>15</sub>F<sub>4</sub>O 311.1054, found: 311.1056.

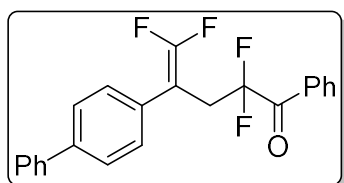

**4-([1,1'-biphenyl]-4-yl)-2,2,5,5-tetrafluoro-1-phenylpent-4-en-1-one (6).** The representative procedure was followed using ethyl 4-([1,1'-biphenyl]-4-yl)-2,2,5,5-tetrafluoropent-4-enoate (**3aa**) (49.65 mg, 0.20 mmol) and phenylmagnesium bromide (0.30 mmol). Isolation by column chromatography (hexane : EtOAc = 10 : 1) yielded **7** (54.6 mg, 71 %) as a white solid.; <sup>1</sup>H NMR (500 MHz, CDCl<sub>3</sub>) δ 7.58 – 7.53 (m, 6H), 7.44 – 7.41 (m, 2H), 7.35 – 7.28 (m, 6H), 3.41 – 3.35 (m, 2H); <sup>13</sup>C NMR (125 MHz, CDCl<sub>3</sub>) δ 155.14 (t, *J* = 289.9 Hz), 141.18, 140.48, 140.00, 132.70, 128.74, 128.43, 128.14, 128.10, 127.92, 127.38, 127.35, 126.98, 126.97, 124.56 (t, *J* = 253.9 Hz) 79.91 (t, *J* = 25.1 Hz), 31.72 (t, *J* = 23.1 Hz); <sup>19</sup>F NMR (377 MHz, CDCl<sub>3</sub>) δ -86.91, -87.03, -104.97; HRMS (ESI) *m/z* ([M+ H]<sup>+</sup>) Calcd. for C<sub>23</sub>H<sub>17</sub>F<sub>4</sub>O 385.1210,

found: 385.1212.

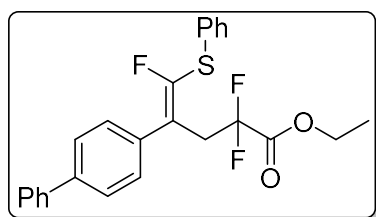

**Ethyl (*E*)-4-([1,1'-biphenyl]-4-yl)-2,2,5-trifluoro-5-(phenylthio)pent-4-enoate (7).**

The representative procedure was followed using ethyl 4-([1,1'-biphenyl]-4-yl)-2,2,5,5-tetrafluoropent-4-enoate (**3aa**) (49.65 mg, 0.20 mmol) and *S*-phenyl 4-methylbenzenesulfonylthioate (63.44 mg, 0.24 mmol). Isolation by column chromatography (hexane : EtOAc = 20 : 1) yielded **6** (50.4 mg, 57 %) as a yellow solid.;

**<sup>1</sup>H NMR (500 MHz, CDCl<sub>3</sub>)**  $\delta$  7.53 – 7.50 (m, 4H), 7.39 – 7.34 (m, 2H), 7.32 – 7.25 (m, 6H), 7.22 – 7.15 (m, 2H), 3.98 (q,  $J$  = 7.0 Hz, 2H), 3.41 – 3.35 (m, 2H), 1.12 (t,  $J$  = 7.0 Hz, 3H); **<sup>13</sup>C NMR (125 MHz, CDCl<sub>3</sub>)**  $\delta$  163.45 (t,  $J$  = 31.9 Hz), 154.73 (t,  $J$  = 96.8 Hz), 152.31, 140.96, 140.35, 135.36, 134.17, 131.41, 129.87, 129.45, 129.02, 128.80 (t,  $J$  = 28.0 Hz), 127.56, 127.02, 126.88, 114.27 (t,  $J$  = 248.5 Hz), 62.95, 29.69, 13.69; **<sup>19</sup>F NMR (377 MHz, CDCl<sub>3</sub>)**  $\delta$  -84.10, -103.00; **HRMS (ESI)  $m/z$  ([M+ H]<sup>+</sup>)**

Calcd. for C<sub>25</sub>H<sub>22</sub>F<sub>3</sub>O<sub>2</sub>S 443.1287, found: 443.1289.

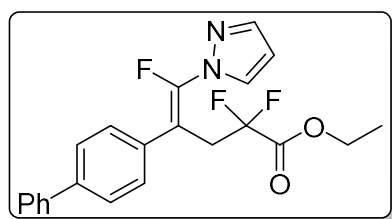

**Ethyl (*Z*)-4-([1,1'-biphenyl]-4-yl)-2,2,5-trifluoro-5-(1*H*-pyrazol-1-yl)pent-4-enoate**

**(8).** The representative procedure was followed using ethyl 4-([1,1'-biphenyl]-4-yl)-2,2,5,5-tetrafluoropent-4-enoate (**3aa**) (297.9 mg, 1.20 mmol) and 1*H*-imidazole (68.1 mg, 1.0 mmol). Isolation by column chromatography (hexane : DCM = 3 : 1) yielded **8** (201.6 mg, 42 %) as a yellow solid.;

**<sup>1</sup>H NMR (500 MHz, CDCl<sub>3</sub>)**  $\delta$  7.64 (s, 1H), 7.55 – 7.53 (m, 2H), 7.47 – 7.46 (m, 2H), 7.43 – 7.40 (m, 2H), 7.35 – 7.34 (m, 1H), 7.24 – 7.23 (m, 1H), 7.11 – 7.09 (m, 2H), 6.20 (s, 1H), 4.10 (q,  $J$  = 7.0 Hz, 2H), 3.53 – 3.47

(m, 2H), 1.27 (t,  $J = 7.0$  Hz, 3H);  $^{13}\text{C}$  NMR (125 MHz,  $\text{CDCl}_3$ )  $\delta$  163.38 (t,  $J = 32.1$  Hz), 148.71, 146.59, 142.28, 140.65 (t,  $J = 47.6$  Hz), 139.97, 131.85, 131.20, 128.77, 128.64, 127.56, 127.04, 126.84, 114.43 (t,  $J = 251.8$  Hz), 107.43, 63.07, 35.82 (t,  $J = 25.9$  Hz), 13.69;  $^{19}\text{F}$  NMR (377 MHz,  $\text{CDCl}_3$ )  $\delta$  -88.00, -103.07; HRMS (ESI)  $m/z$  ( $[\text{M} + \text{H}]^+$ ) Calcd. for  $\text{C}_{22}\text{H}_{20}\text{F}_3\text{N}_2\text{O}_2$  401.1471, found: 401.1473.

## 5. Mechanistic studies

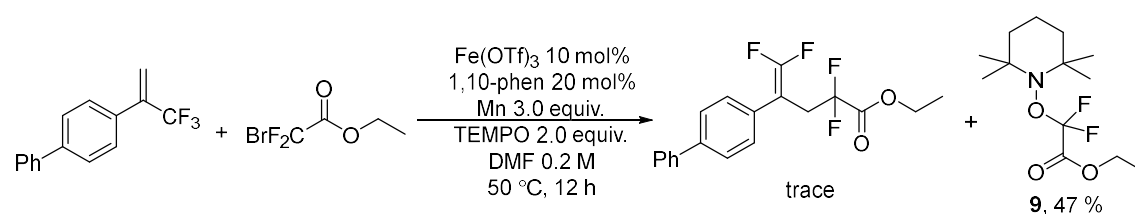

**Ethyl 2,2-difluoro-2-((2,2,6,6-tetramethylpiperidin-1-yl)oxy)acetate (9).** The representative procedure was followed using 4-(3,3,3-trifluoroprop-1-en-2-yl)-1,1'-biphenyl (**1a**) (49.65 mg, 0.20 mmol), ethyl 2-bromo-2,2-difluoroacetate (**2a**) (81.19 mg, 0.4 mmol) and TEMPO (62.5 mg, 0.4 mmol). Then we found that TEMPO can capture ester radical in 47% isolated yield. Isolation by column chromatography (hexane : DCM = 3 : 1) yielded **9** as a colorless liquid.;  $^1\text{H}$  NMR (500 MHz,  $\text{CDCl}_3$ )  $\delta$  4.31 – 4.26 (q,  $J = 7.0$  Hz, 2H), 1.52 – 1.47 (m, 6H), 1.32 – 1.28 (t,  $J = 7.0$  Hz, 3H), 1.12 (s, 6H), 1.10 (s, 6H);  $^{13}\text{C}$  NMR (125 MHz,  $\text{CDCl}_3$ )  $\delta$  160.73 (t,  $J = 42.1$  Hz), 115.48 (t,  $J = 269.8$  Hz), 63.00, 61.38, 40.19, 33.41, 20.75, 16.90, 13.92;  $^{19}\text{F}$  NMR (377 MHz,  $\text{CDCl}_3$ )  $\delta$  -73.46.

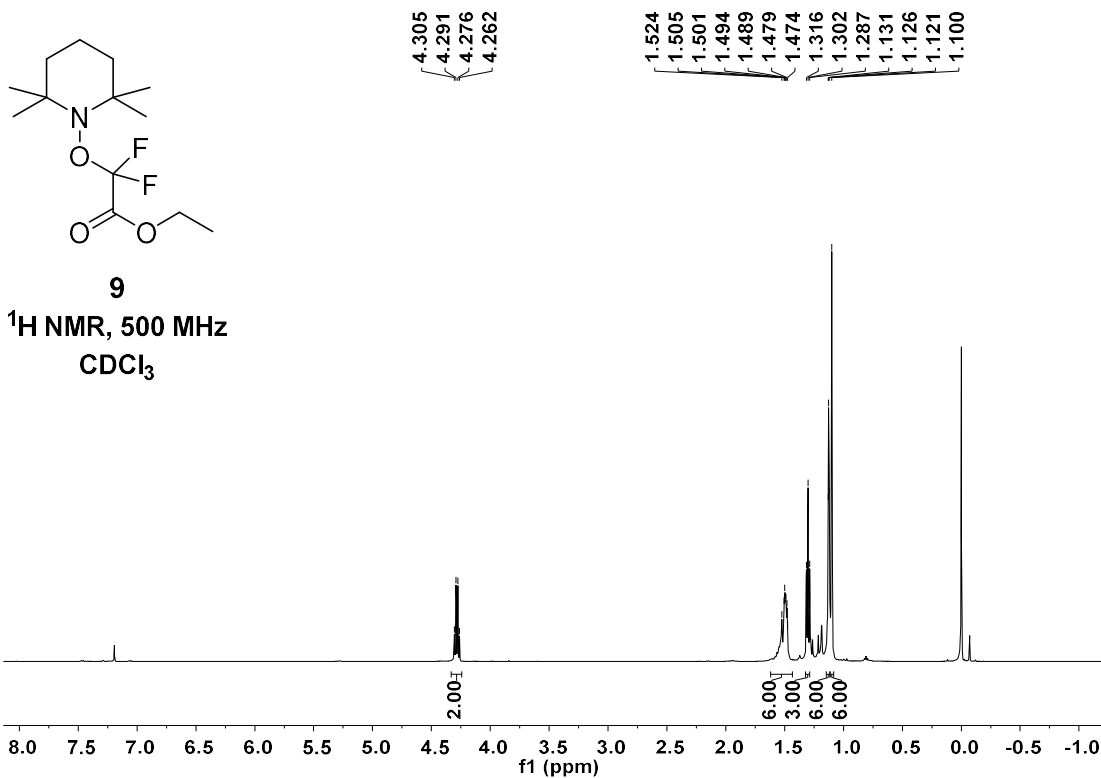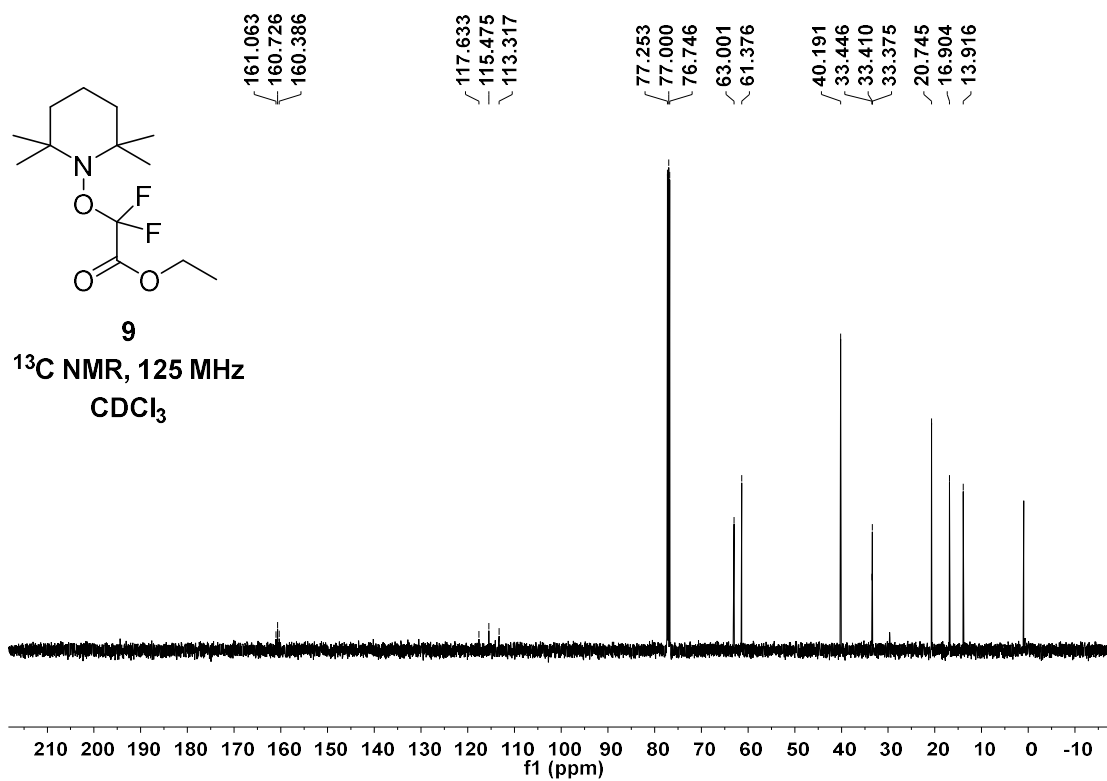

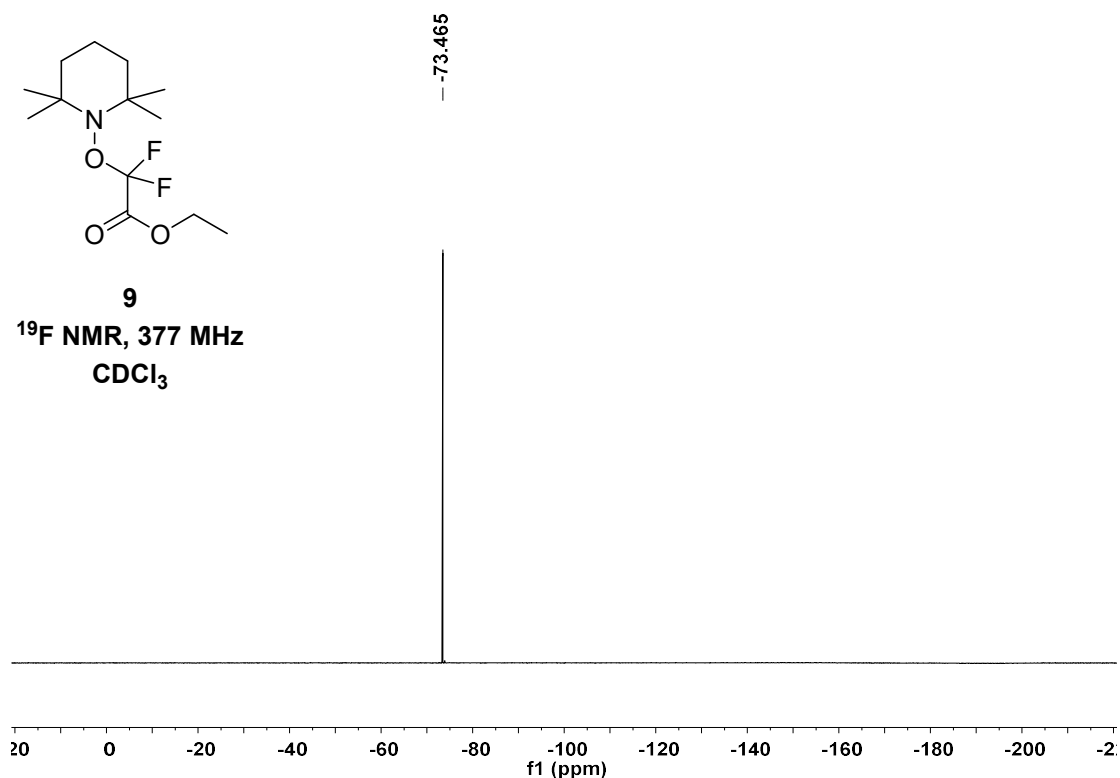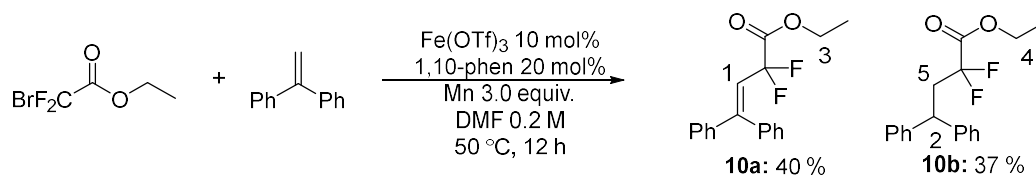

To a 10 mL Schlenk tube was added sequentially  $\text{Fe}(\text{OTf})_3$  (10.07 mg, 0.02 mmol), 1,10-Phenanthroline (6.80 mg, 0.04 mmol), Mn power (32.90 mg, 0.6 mmol). The vessel was evacuated and filled with argon (three times), DMF (0.20 mL) was added via syringe and the mixture was stirred at room temperature for 10 min, ethyl 2-bromo-2,2-difluoroacetate (0.4 mmol, 81.2 mg) and 1,1-diphenylethylene (0.4 mmol, 72.0 mg) was added. The resulting solution was stirred for 12 h at room temperature. After this time, the crude reaction mixture was diluted with ethyl acetate (5 mL) and washed with water (2.0 mL  $\times$  3). The organic layer was dried over  $\text{Na}_2\text{SO}_4$ , filtered, and concentrated. The residue was purified by flash chromatography.

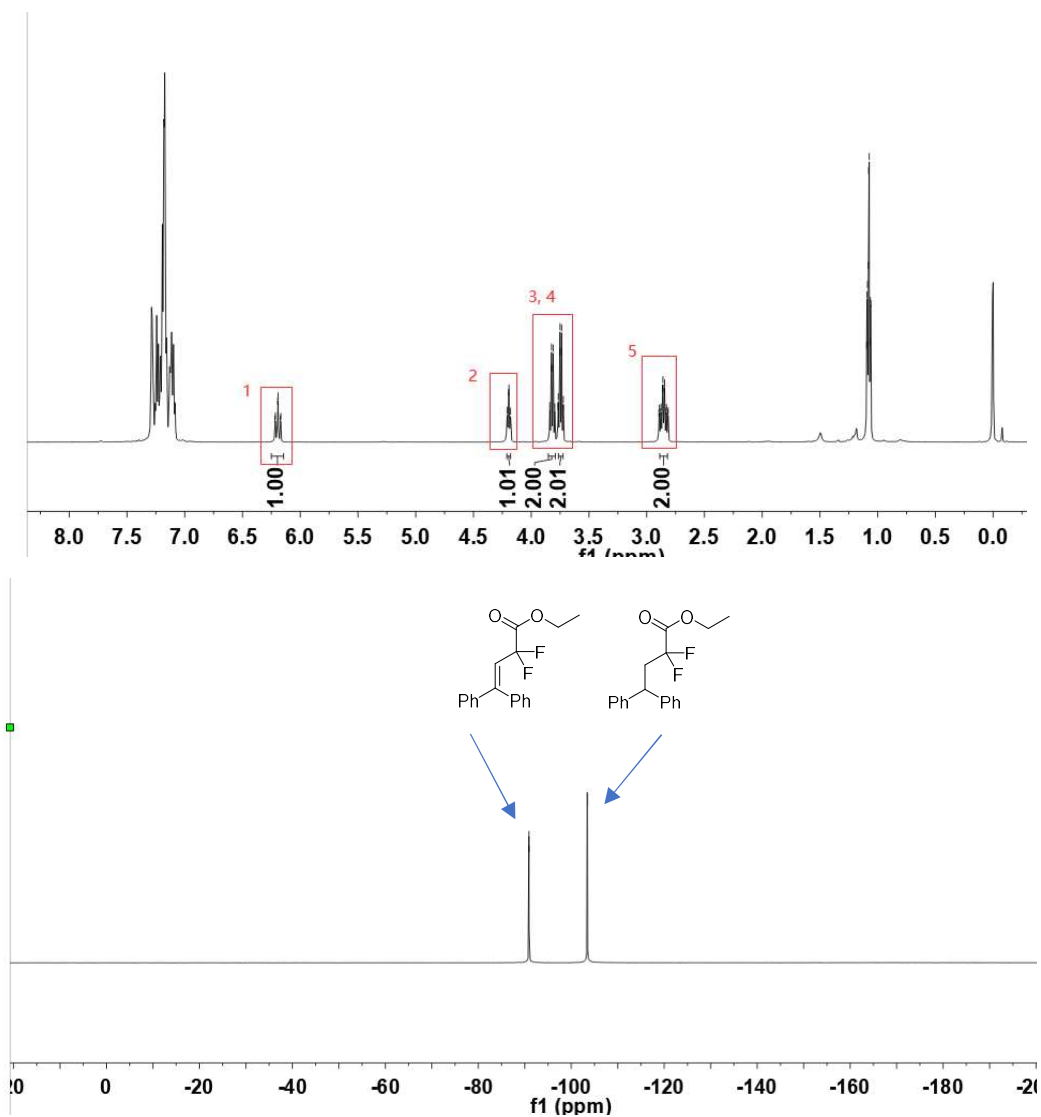

## References:

- [1] B. M. Trost and L. Debien, *J. Am. Chem. Soc.*, 2015, **137**, 11606.
- [2] S. B. Lang, R. J. Wiles, C. B. Kelly and G. A. Molander, *Angew. Chem. Int. Ed.*, 2017, **56**, 15073.
- [3] J. Li, W. Rao, S.-Y. Wang and S.-J. Ji, *J. Org. Chem.*, 2019, **84**, 11542.
- [4] Y. Xiong, X. Zhang, T. Huang and S. Cao, *J. Org. Chem.*, 2014, **79**, 6395.

## 6. NMR Spectra for all the products

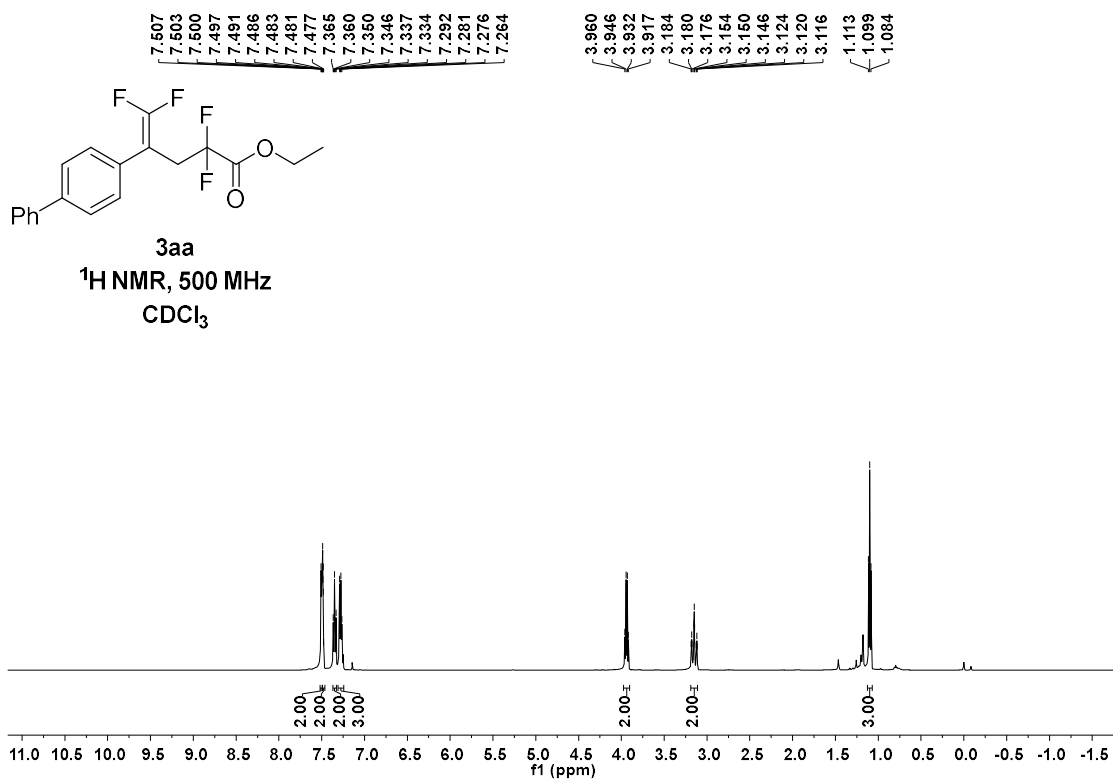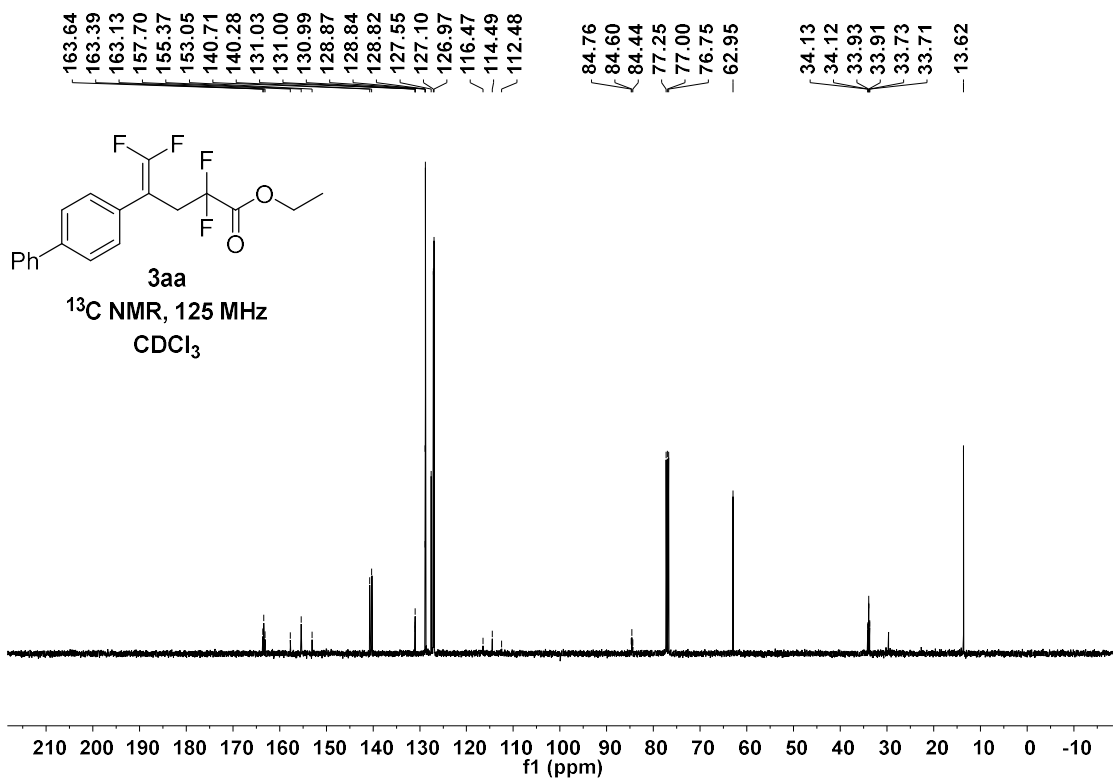

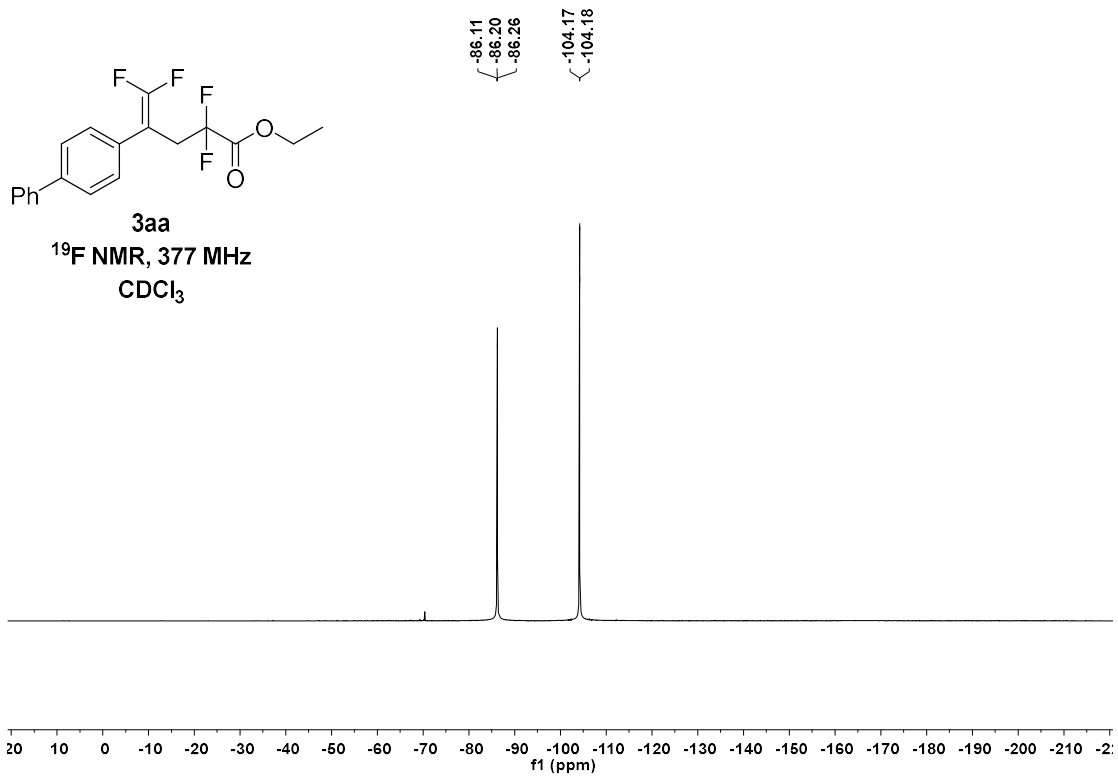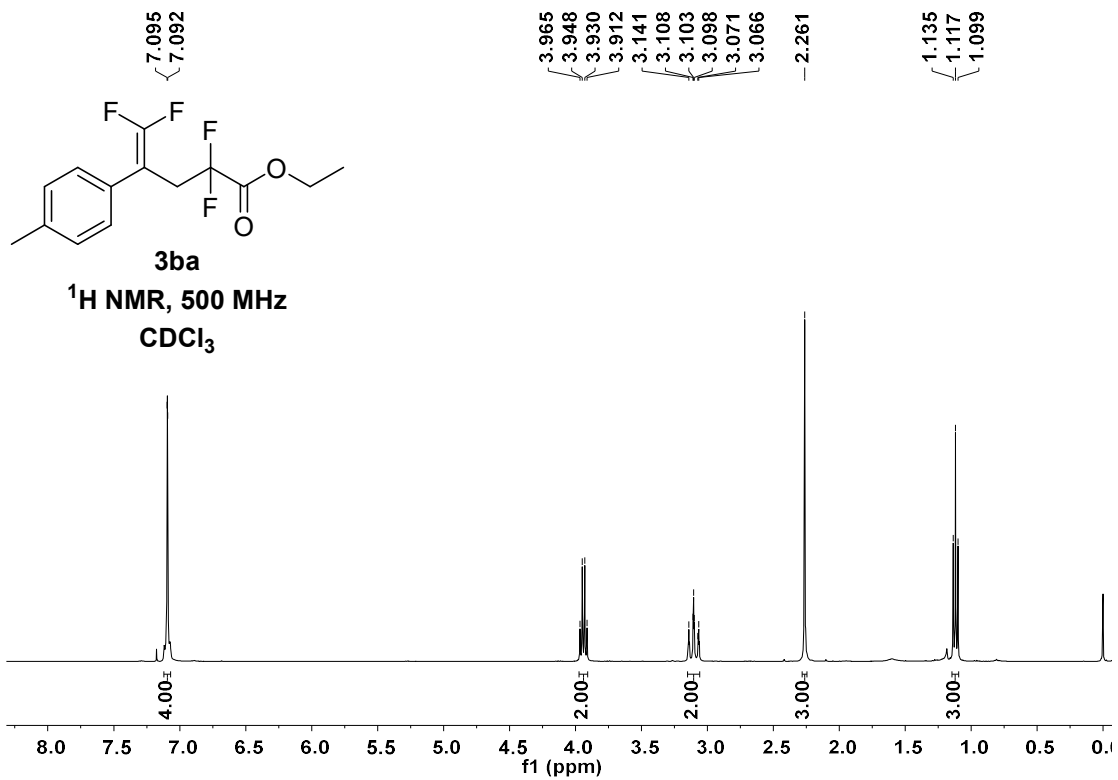



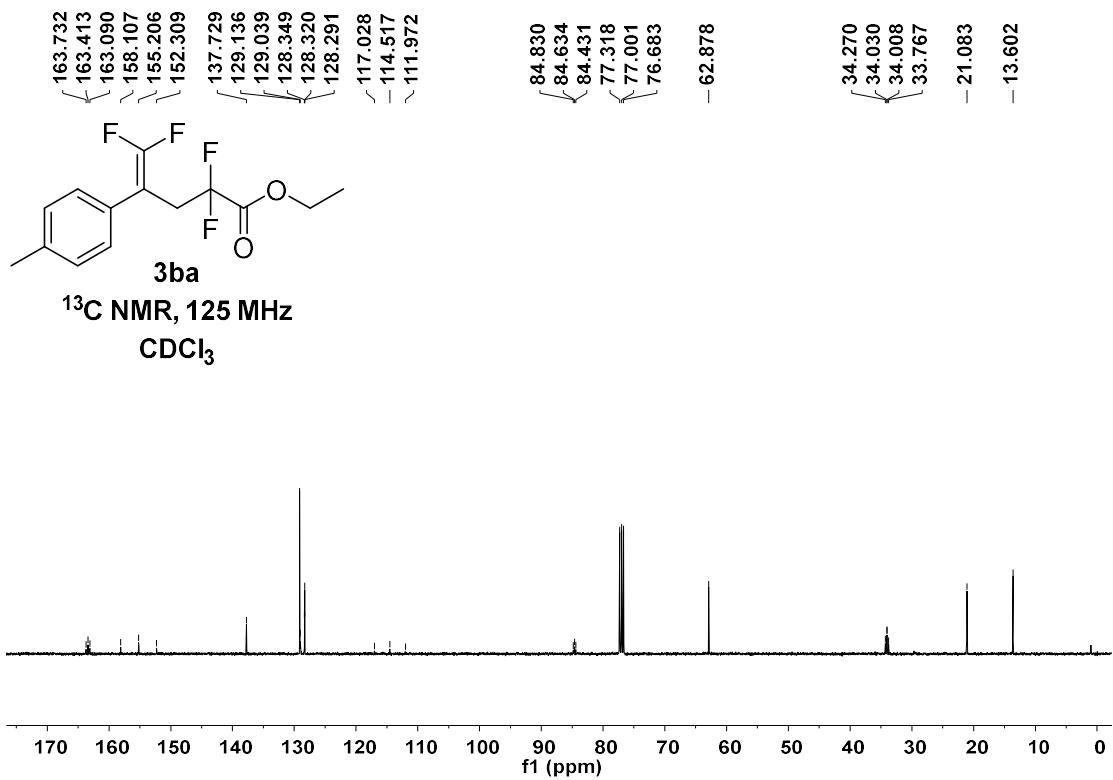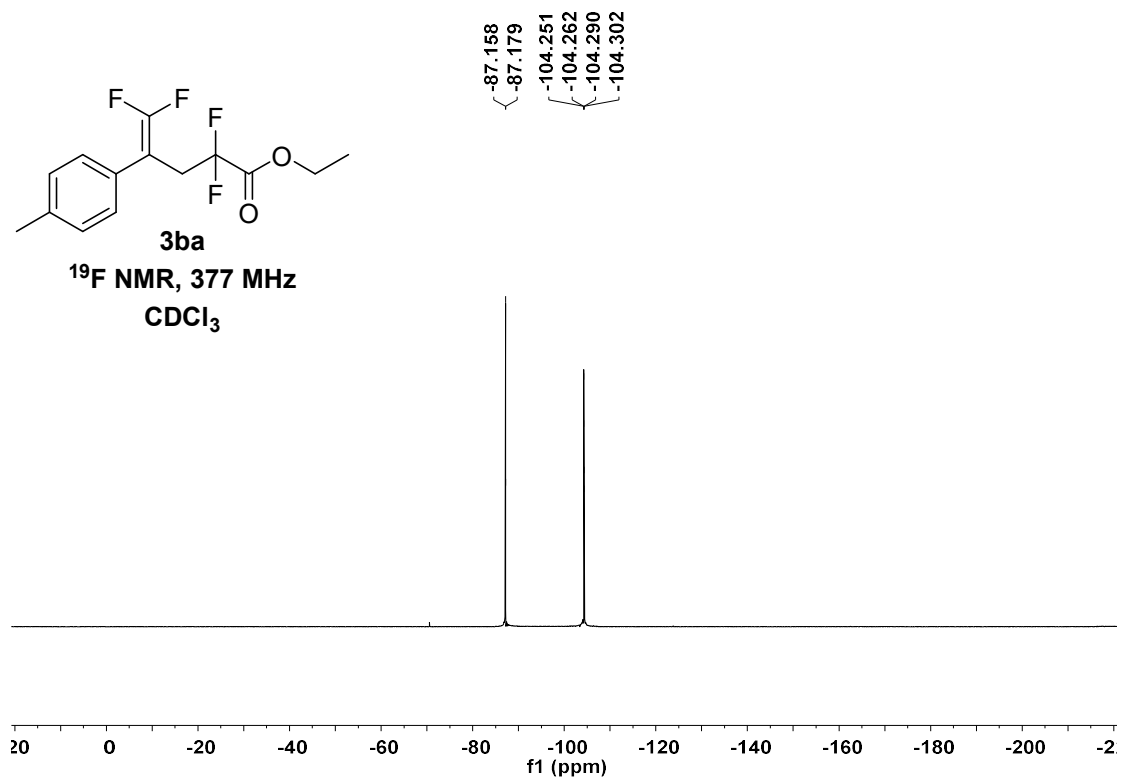

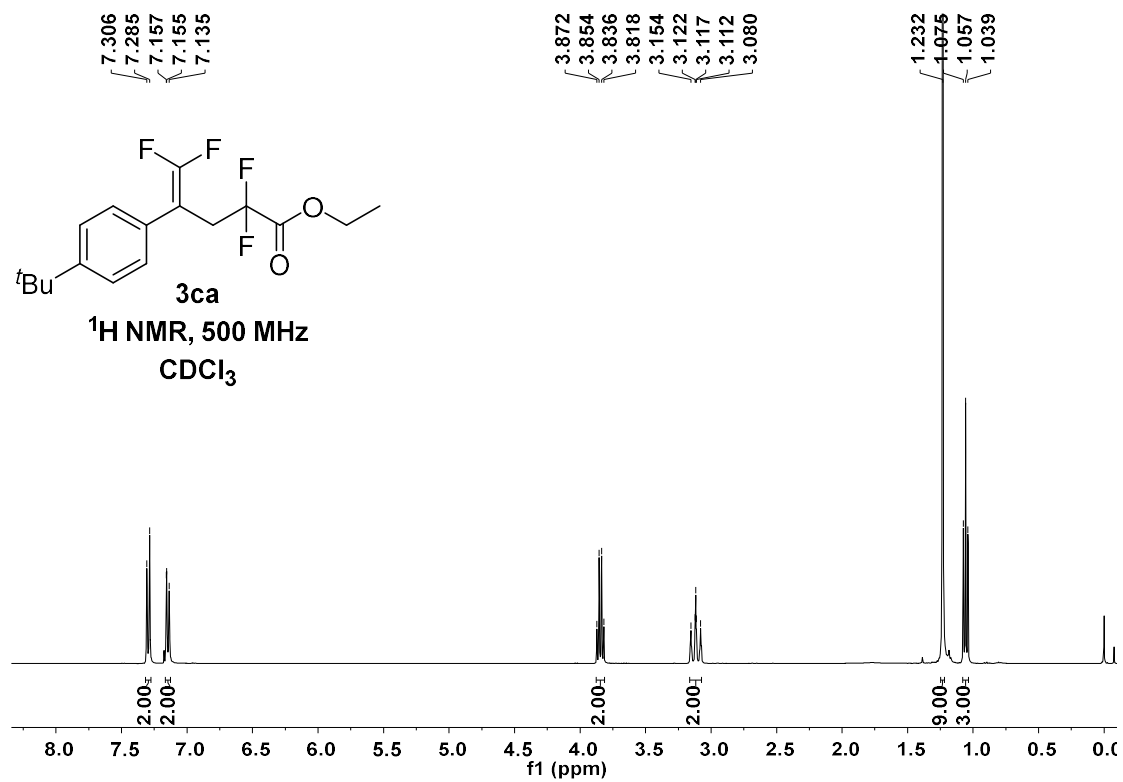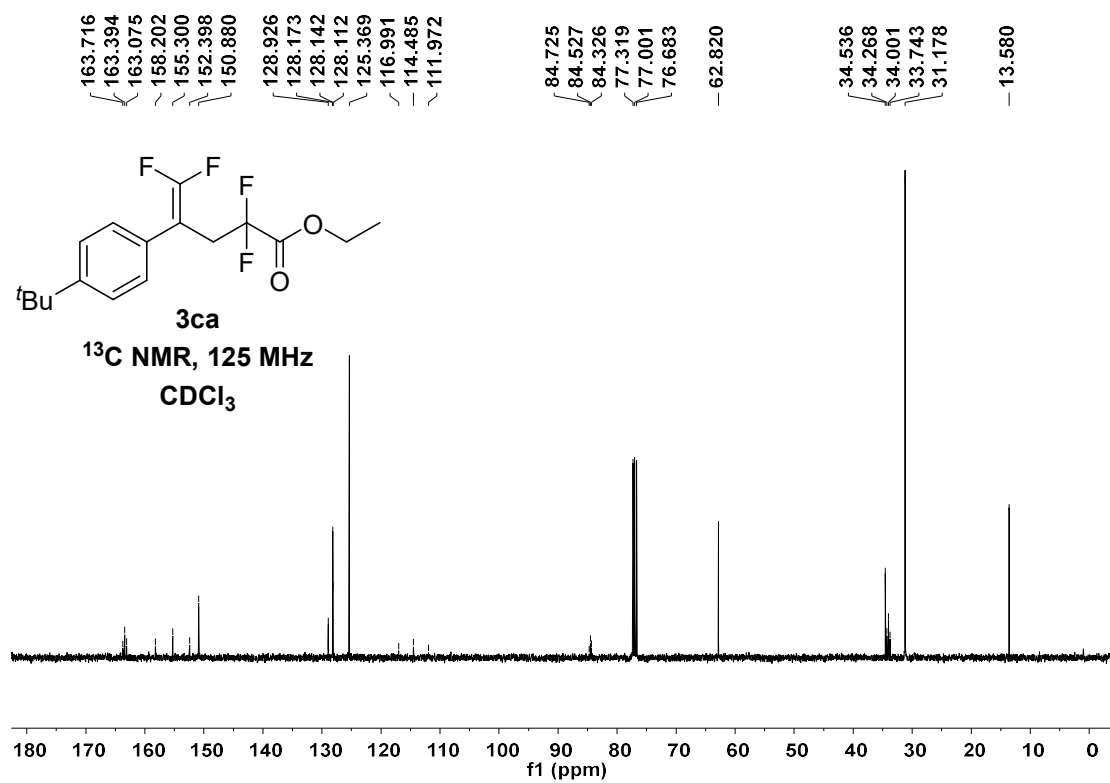

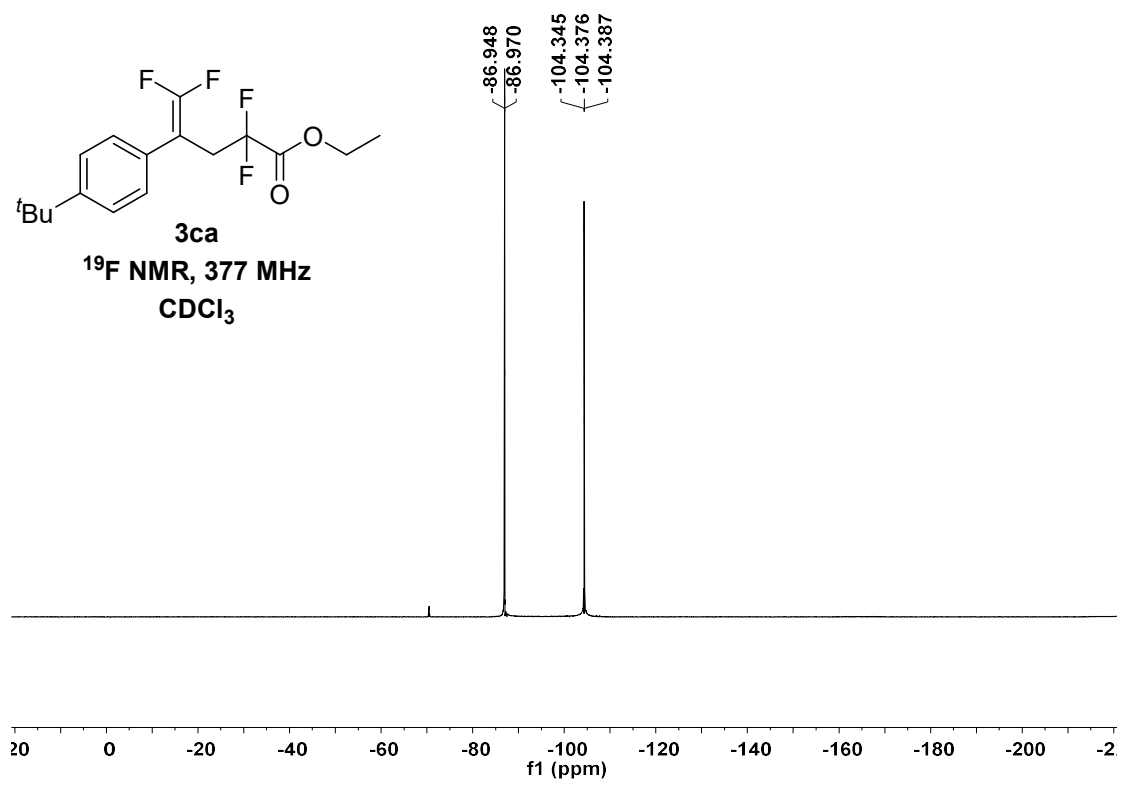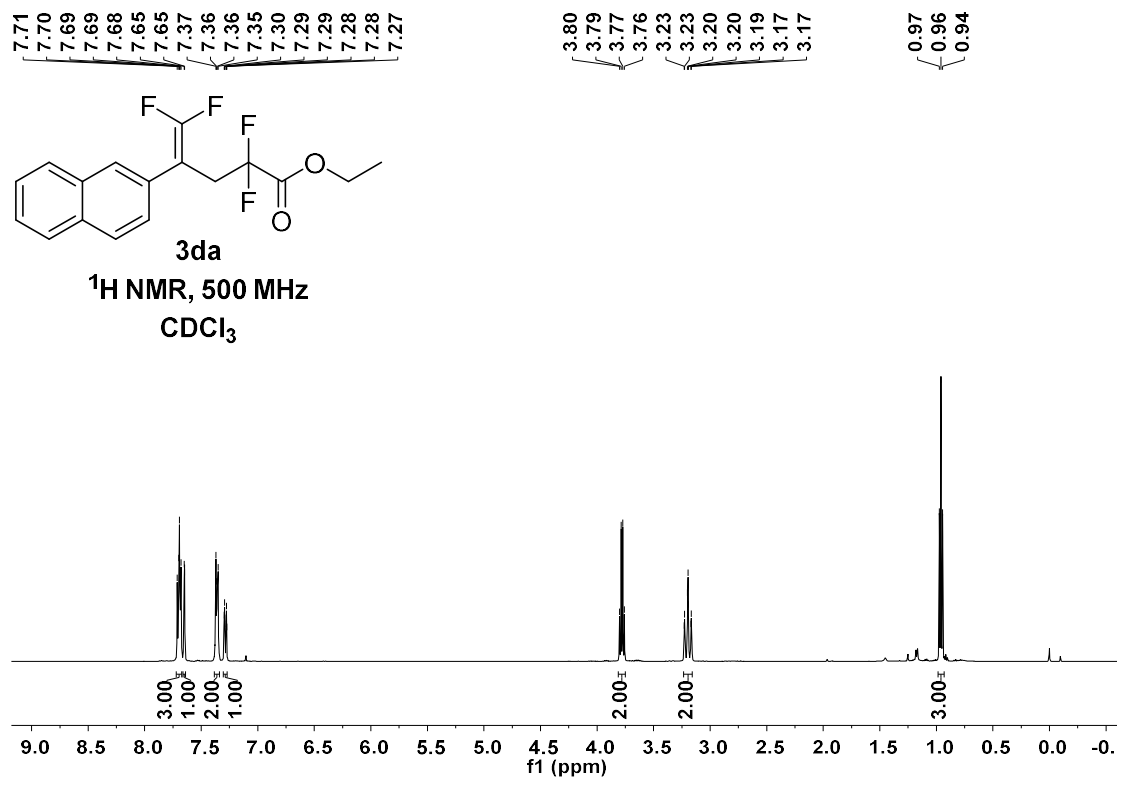

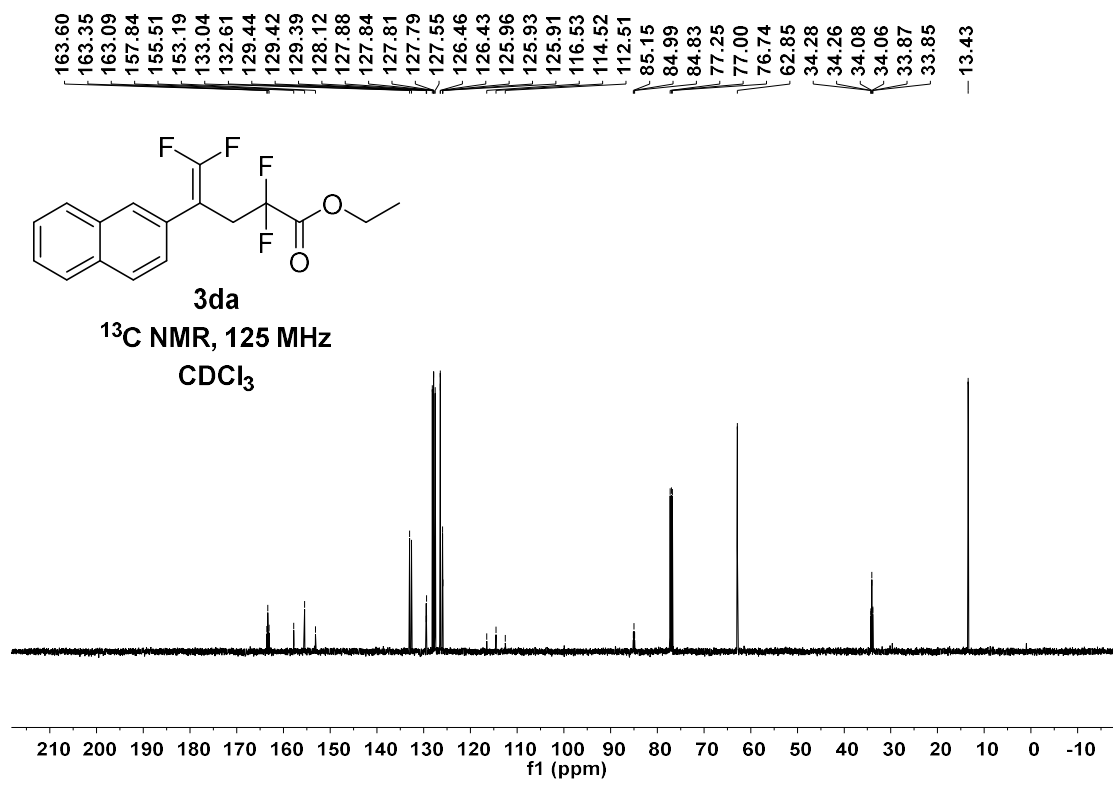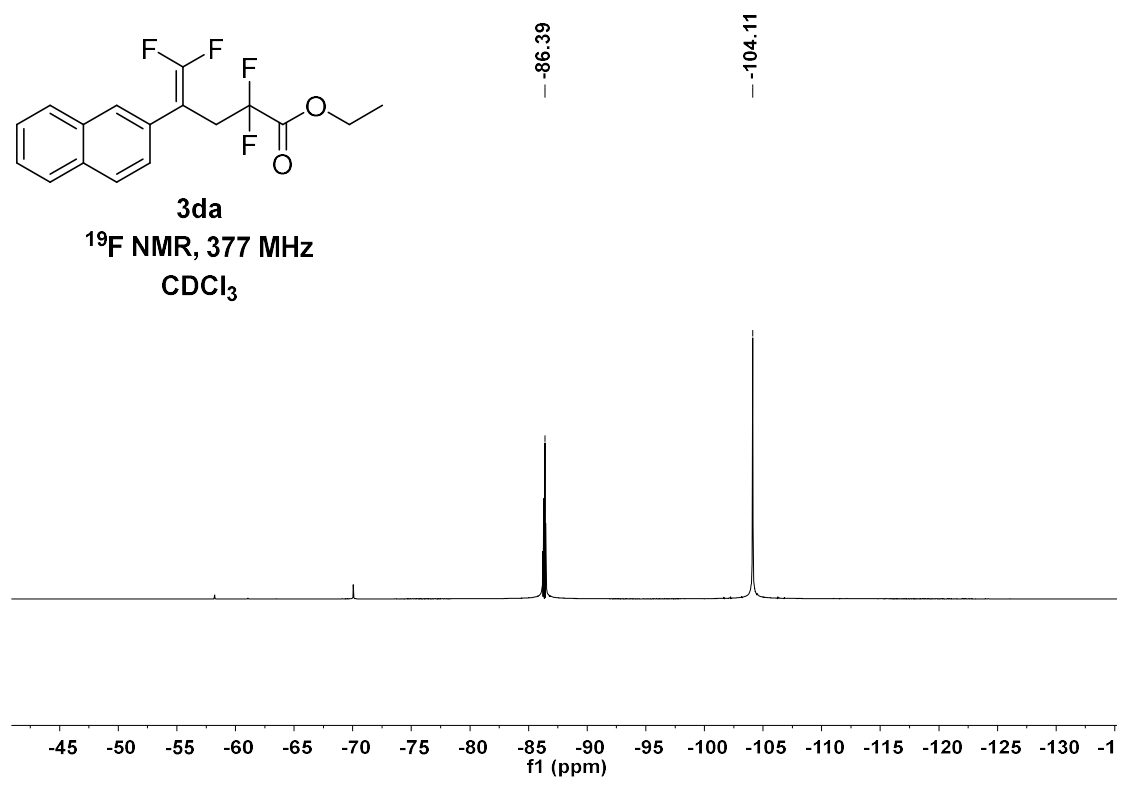

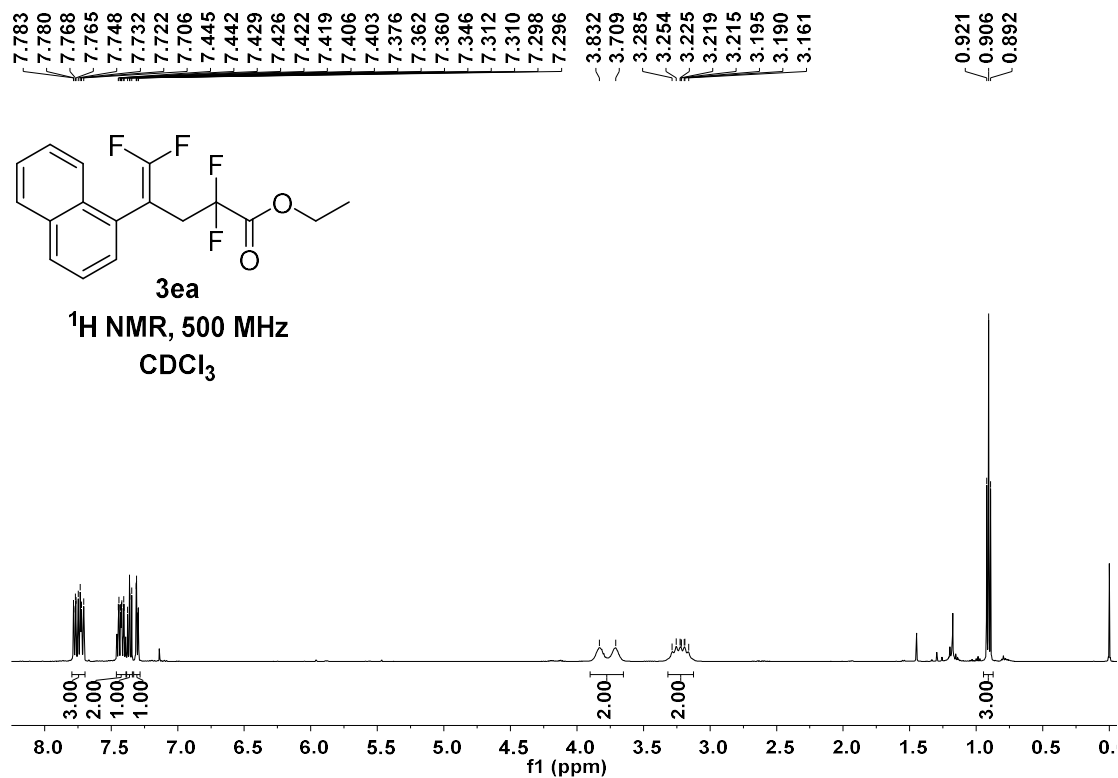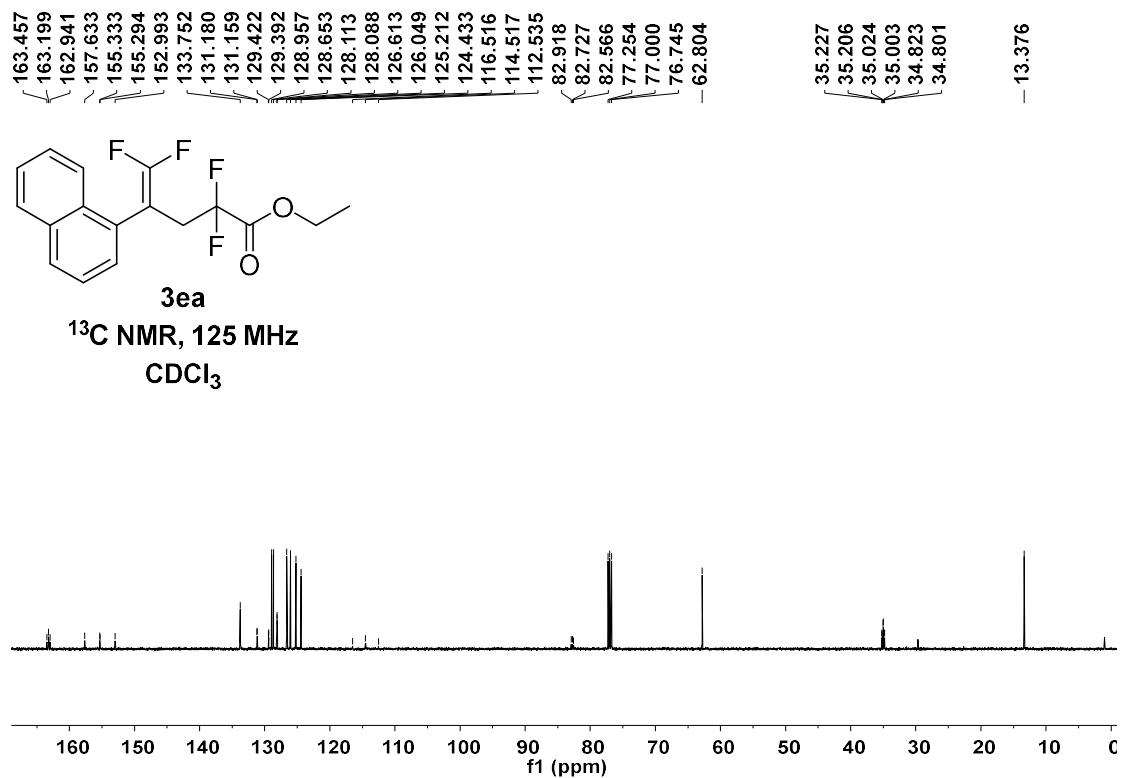

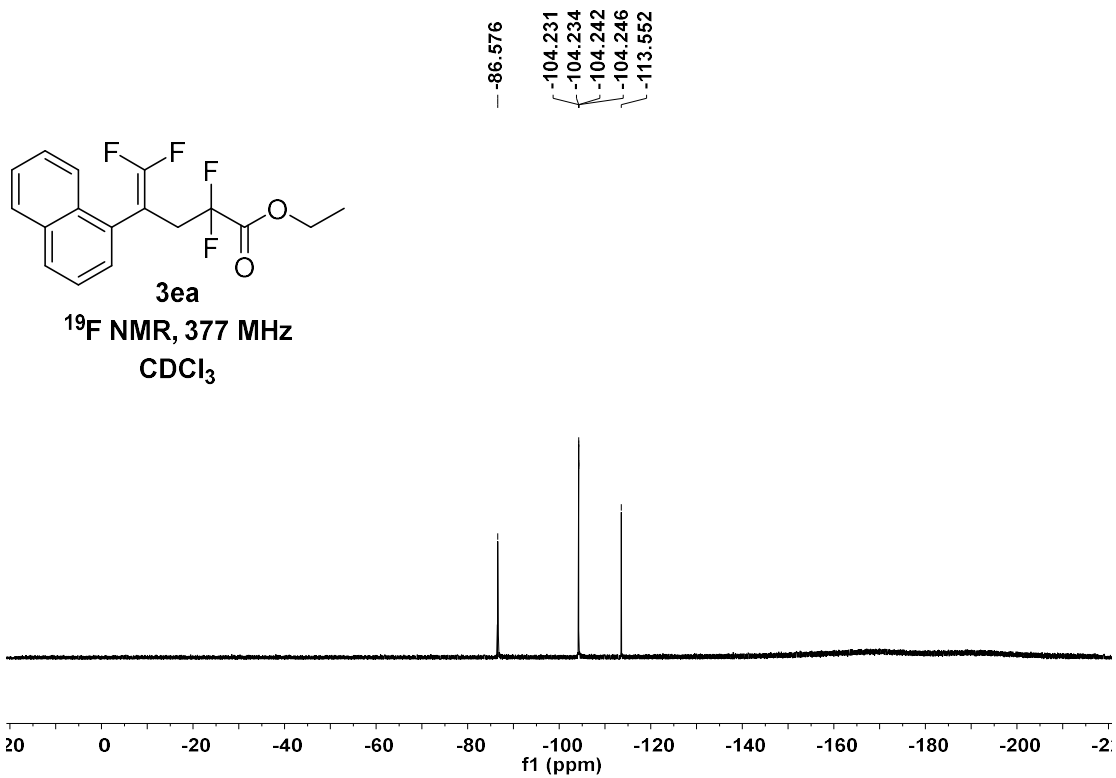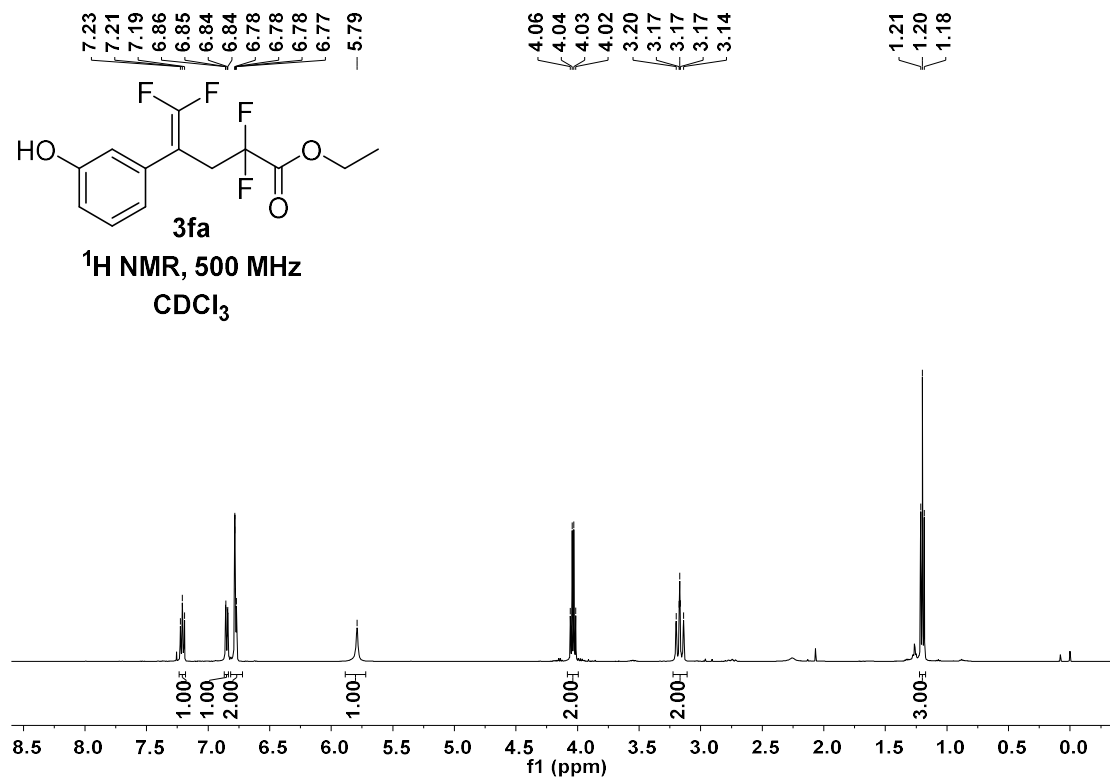

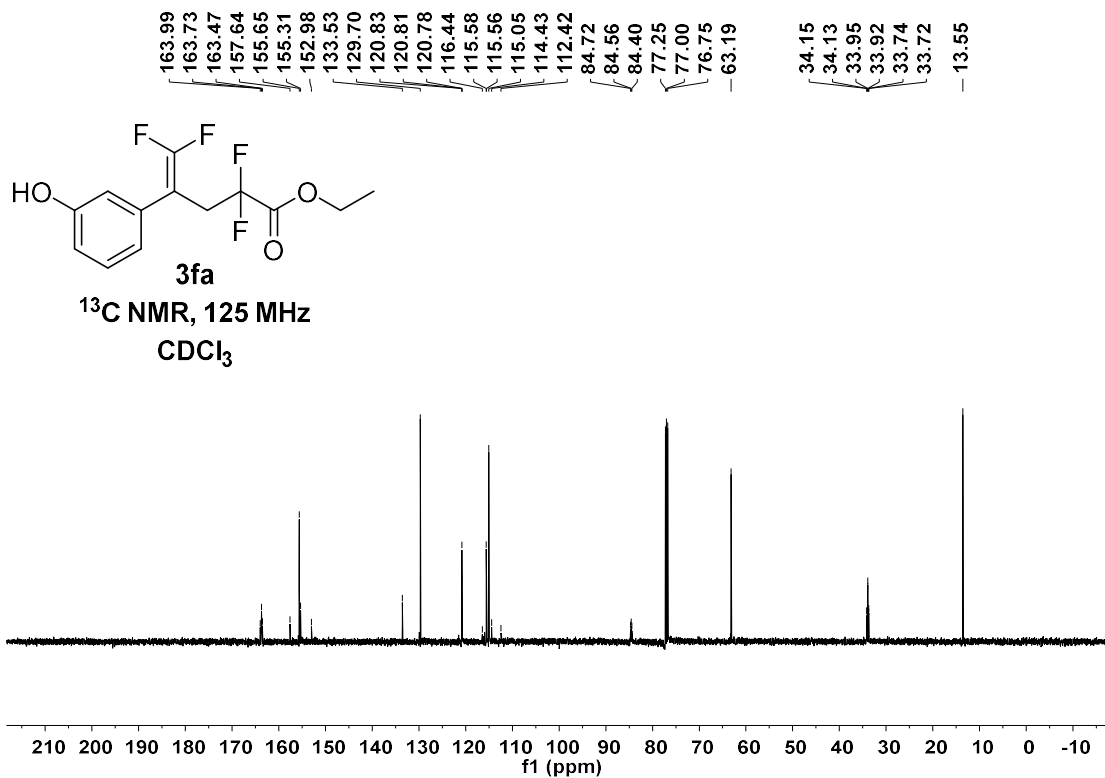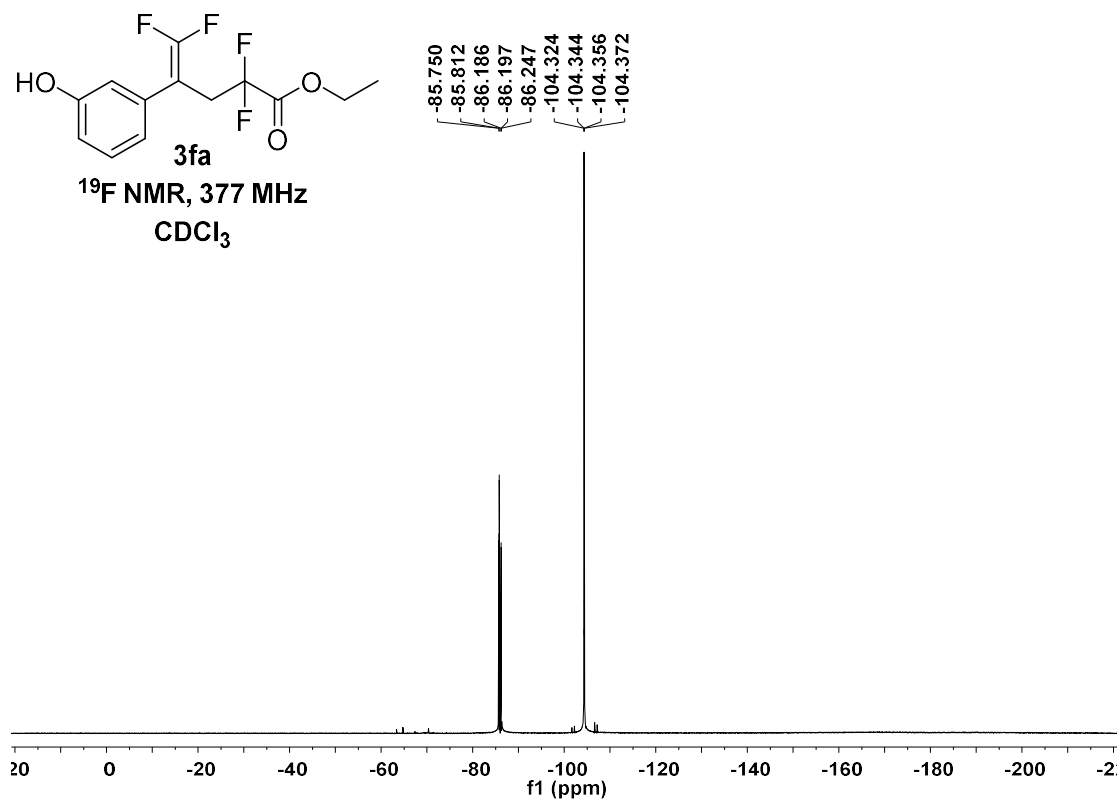

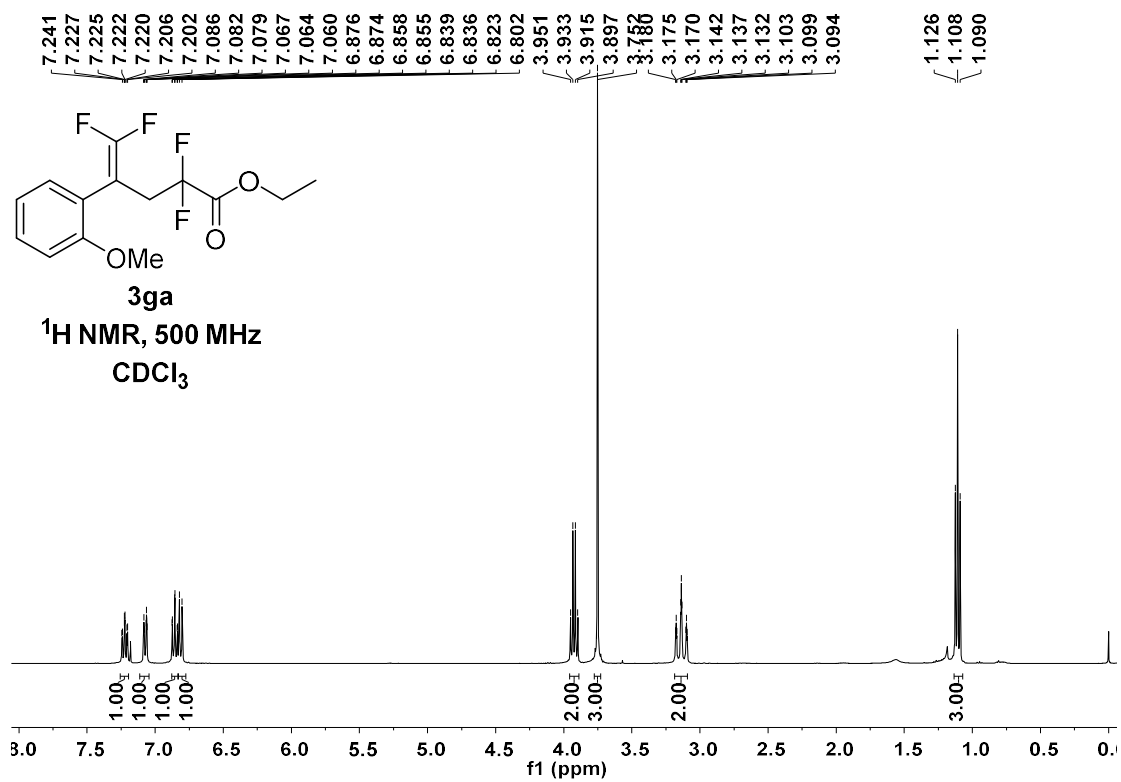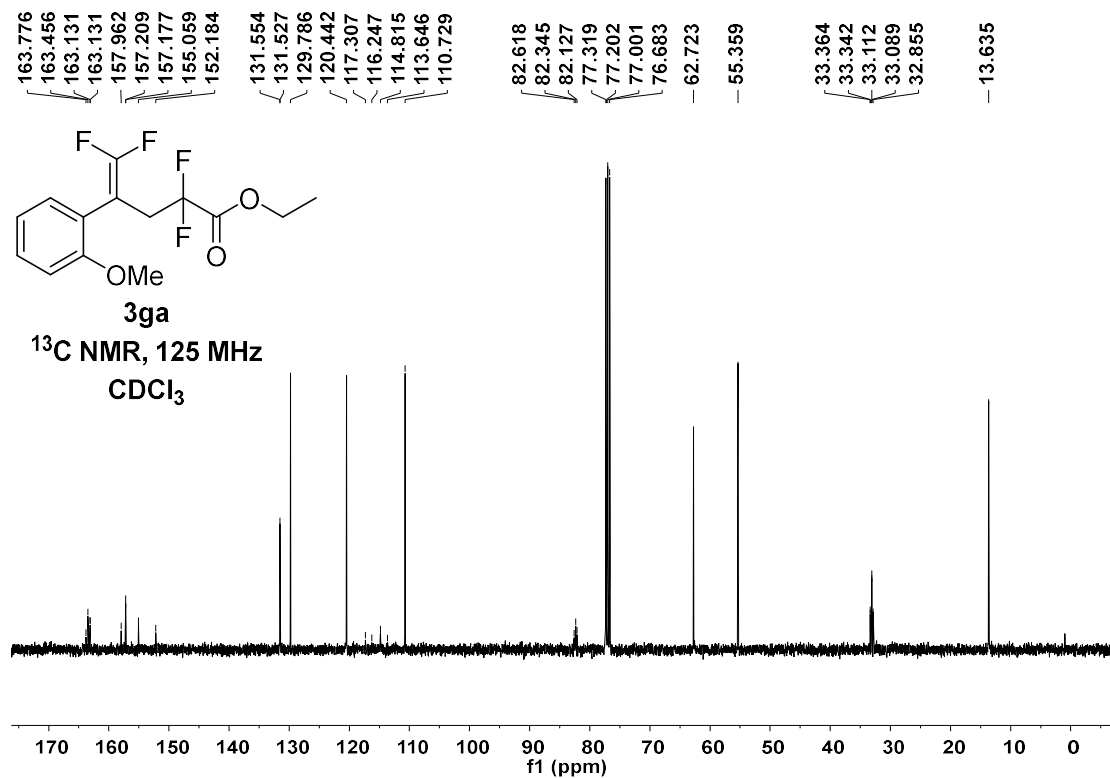



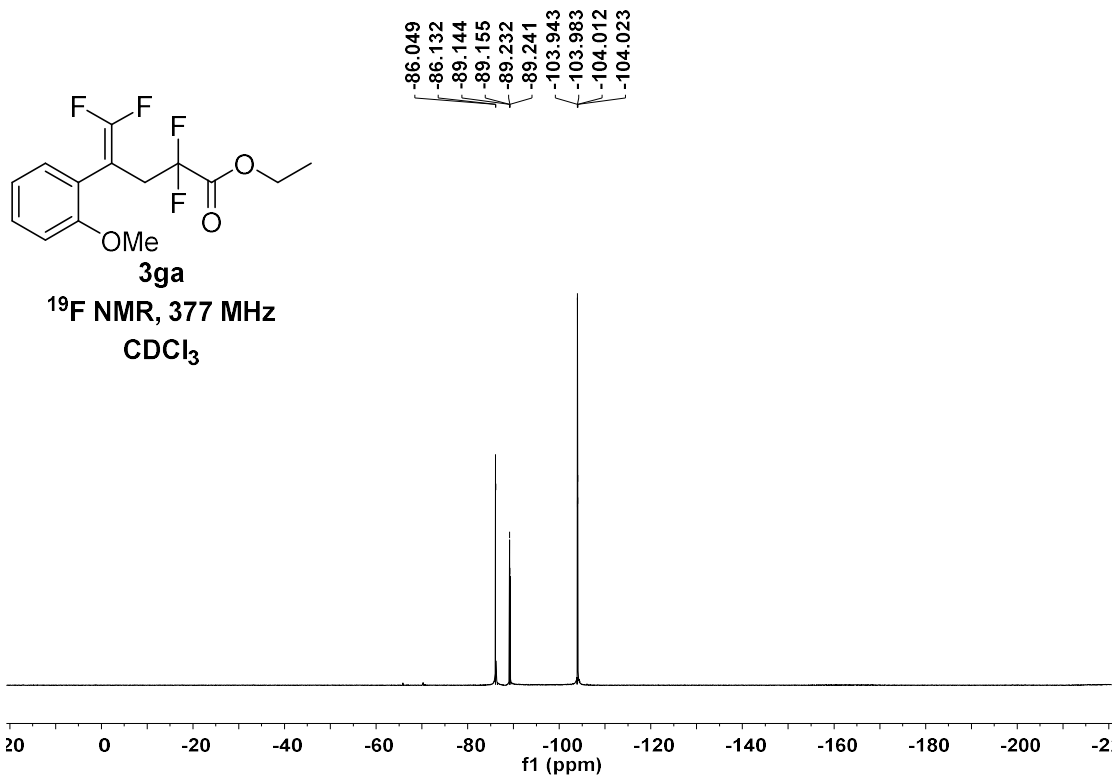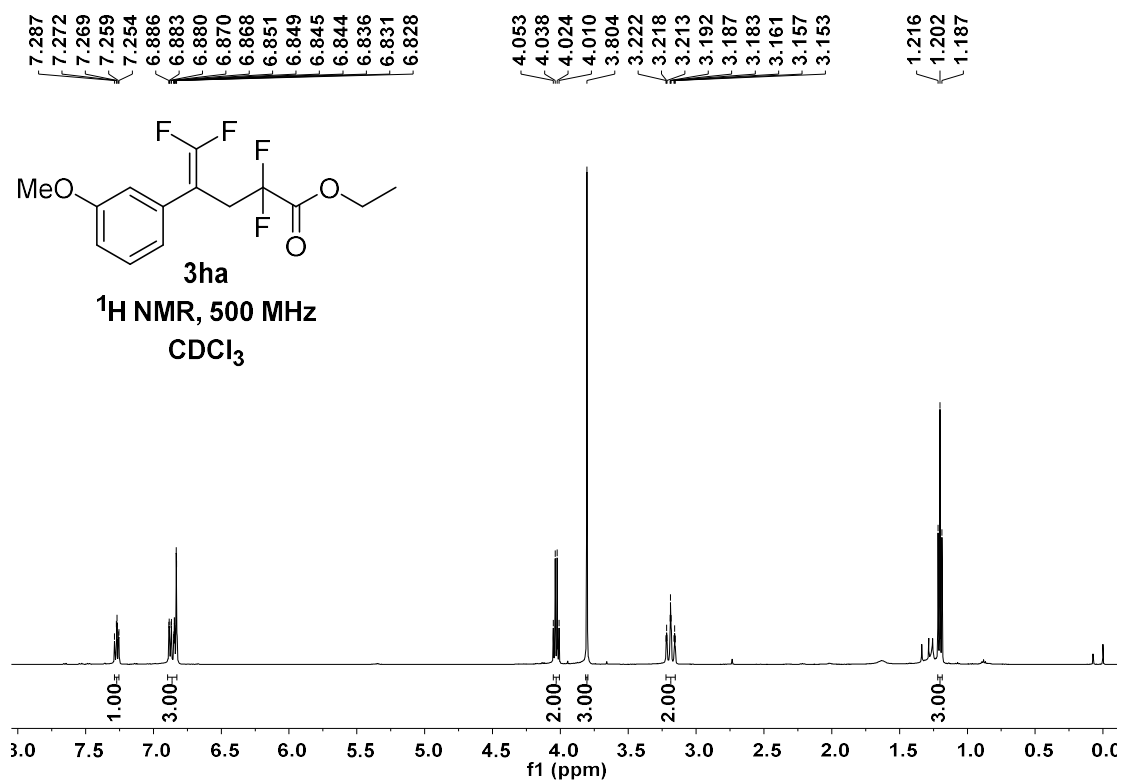

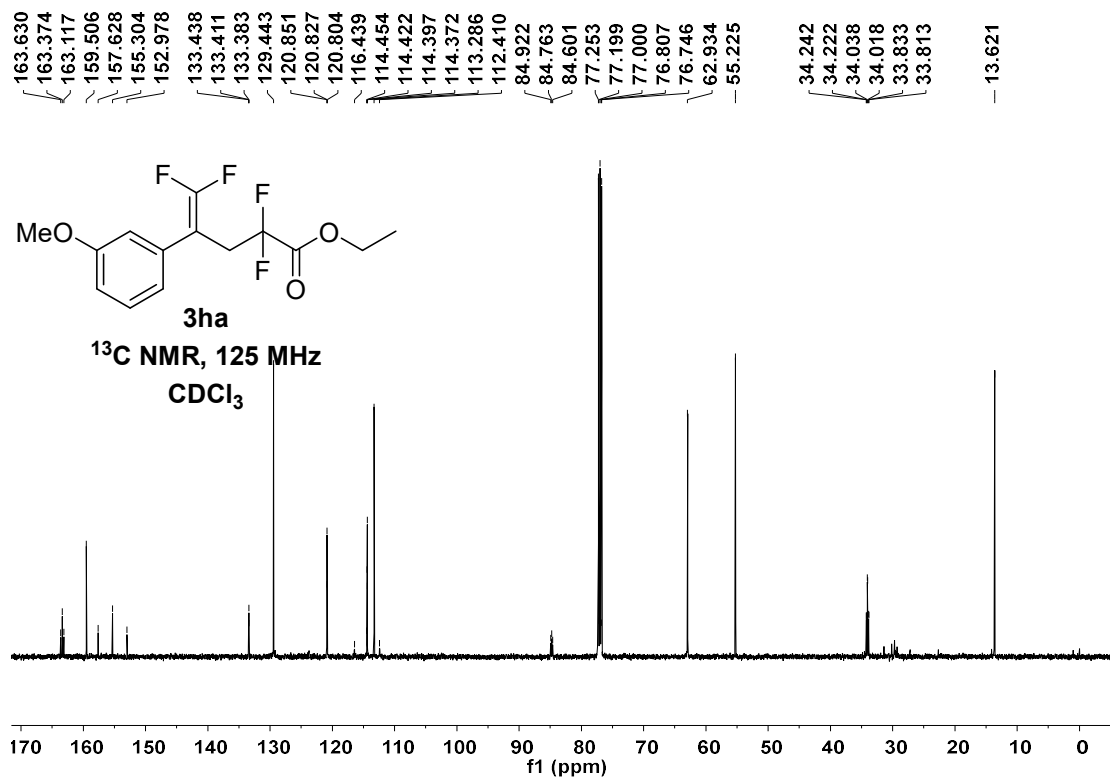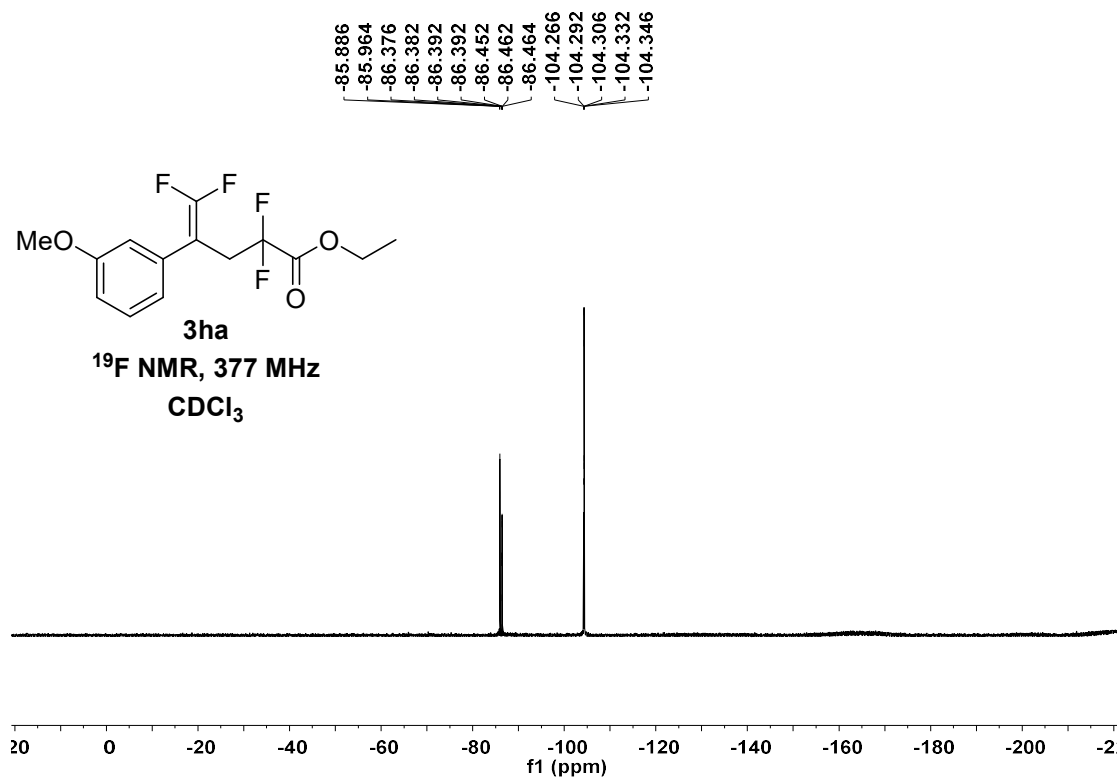

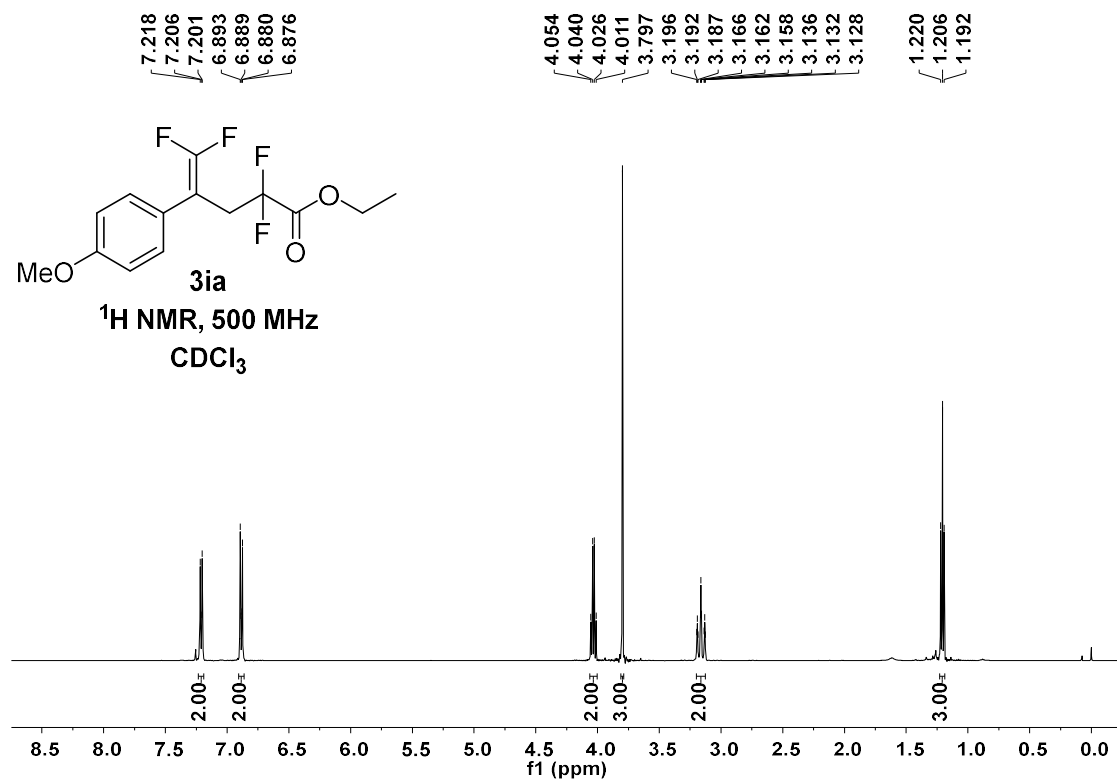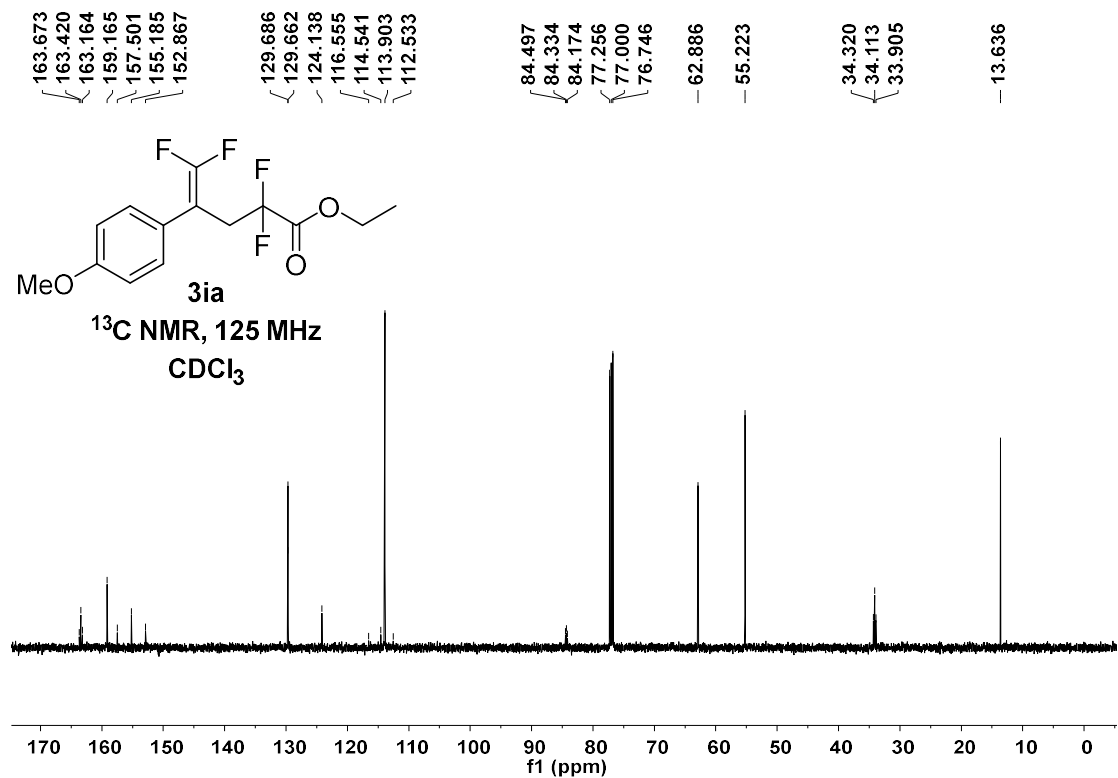

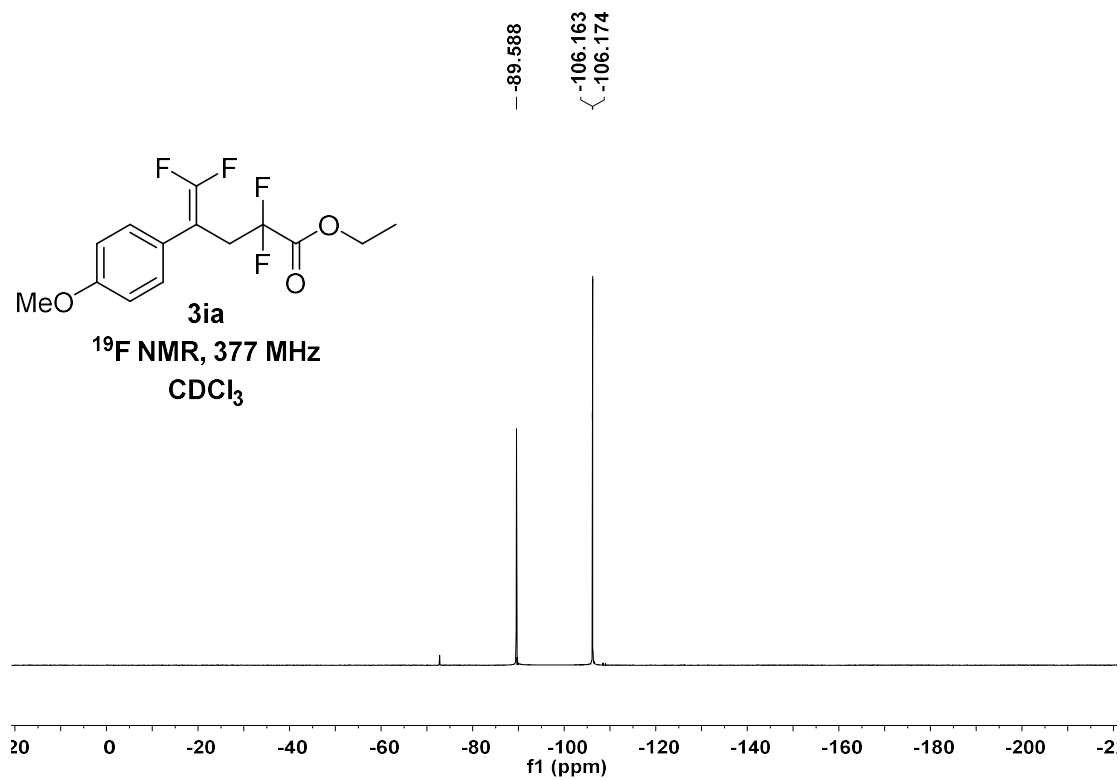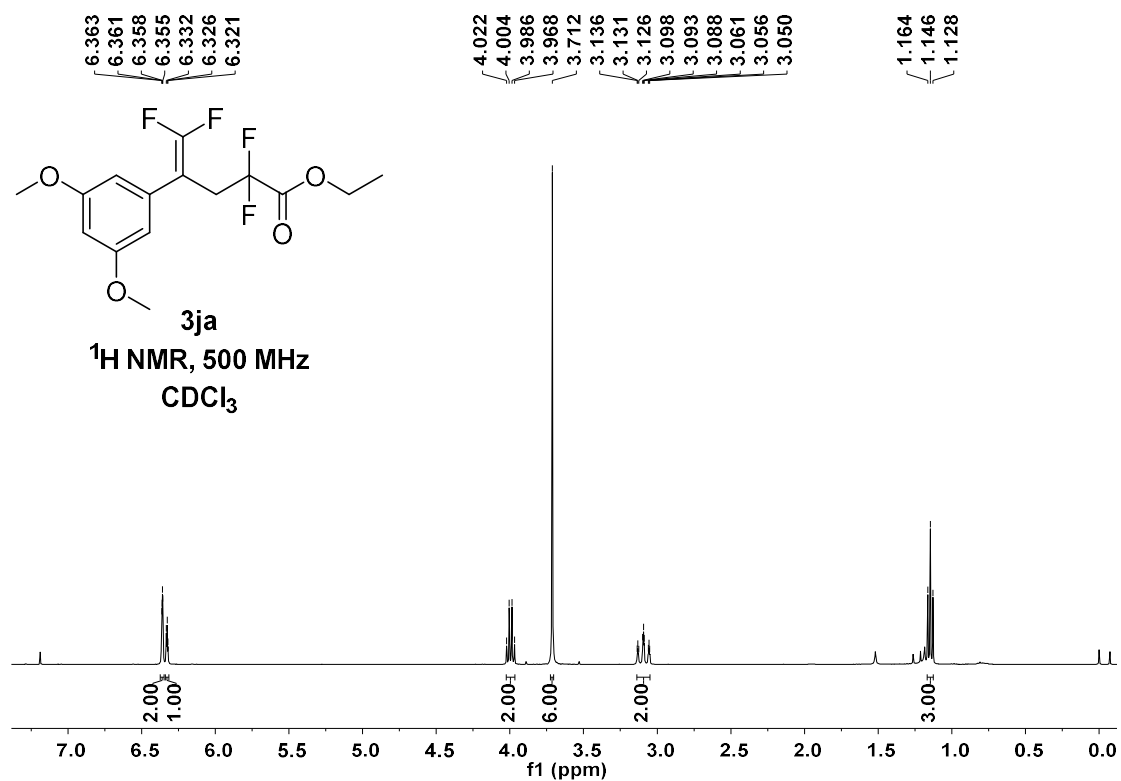

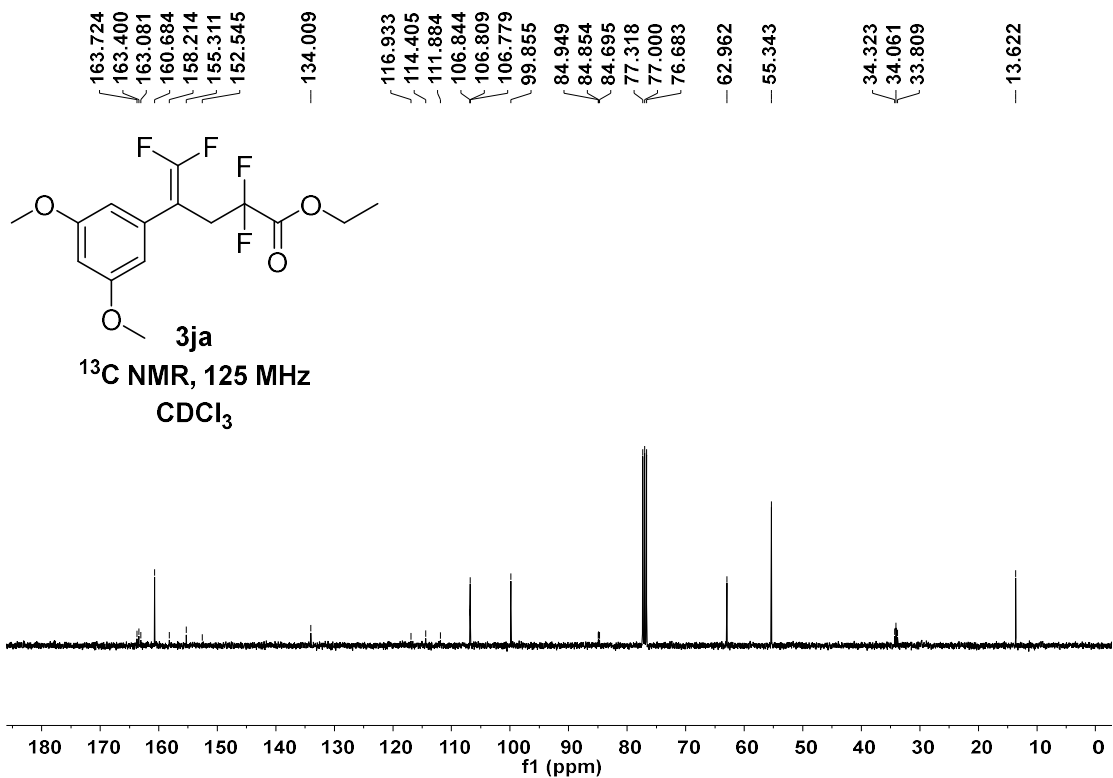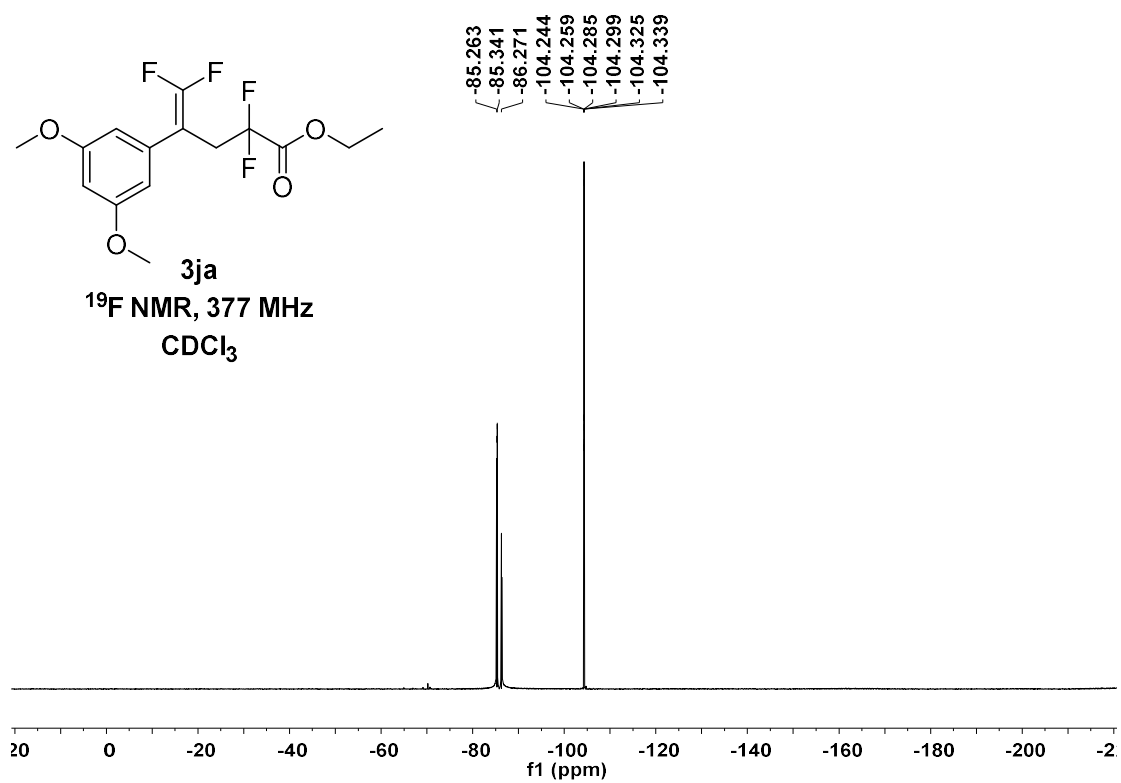

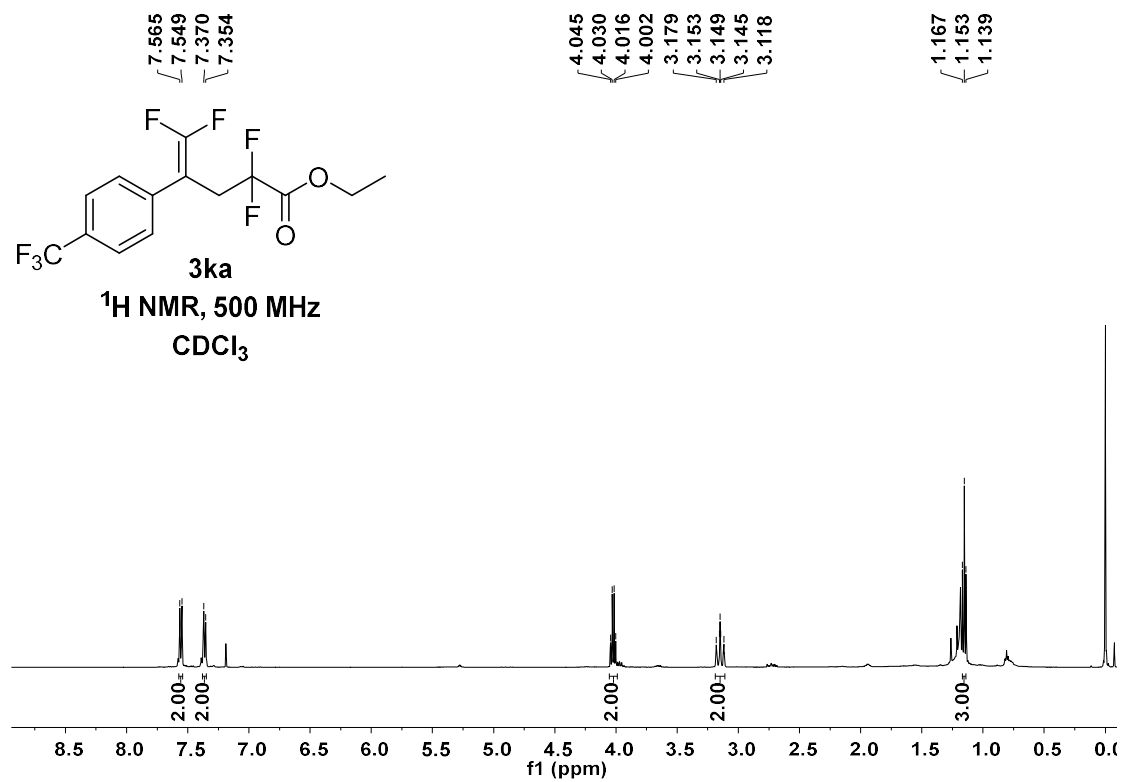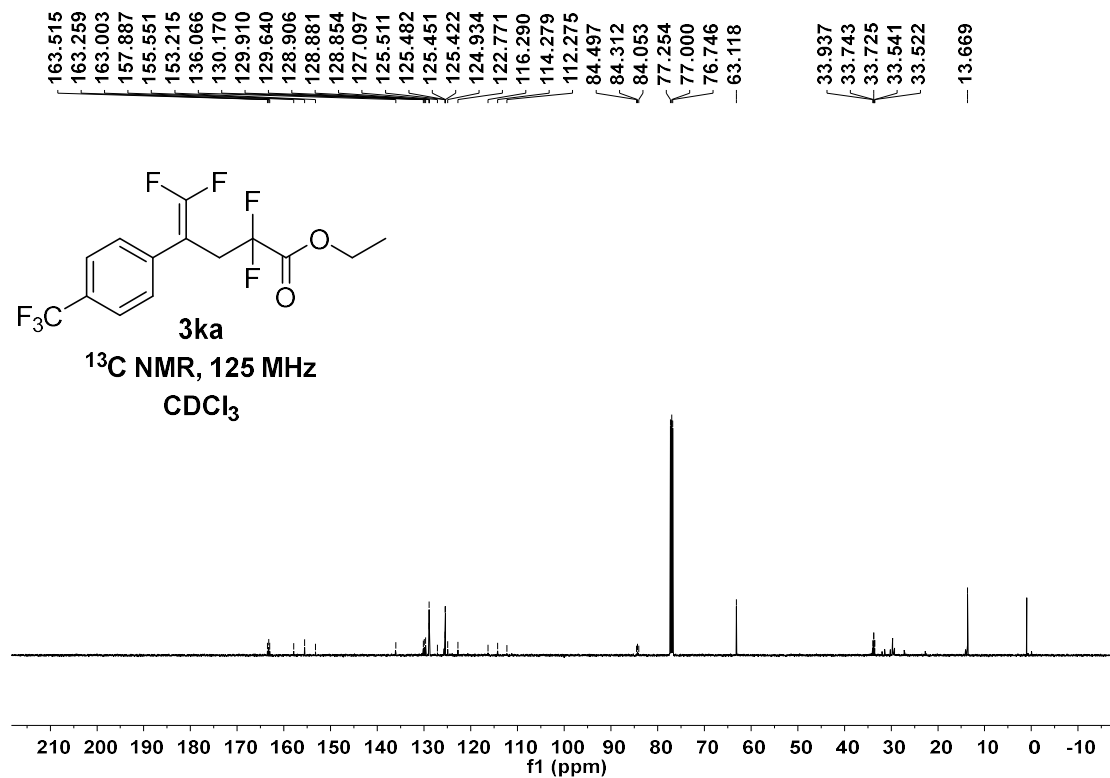

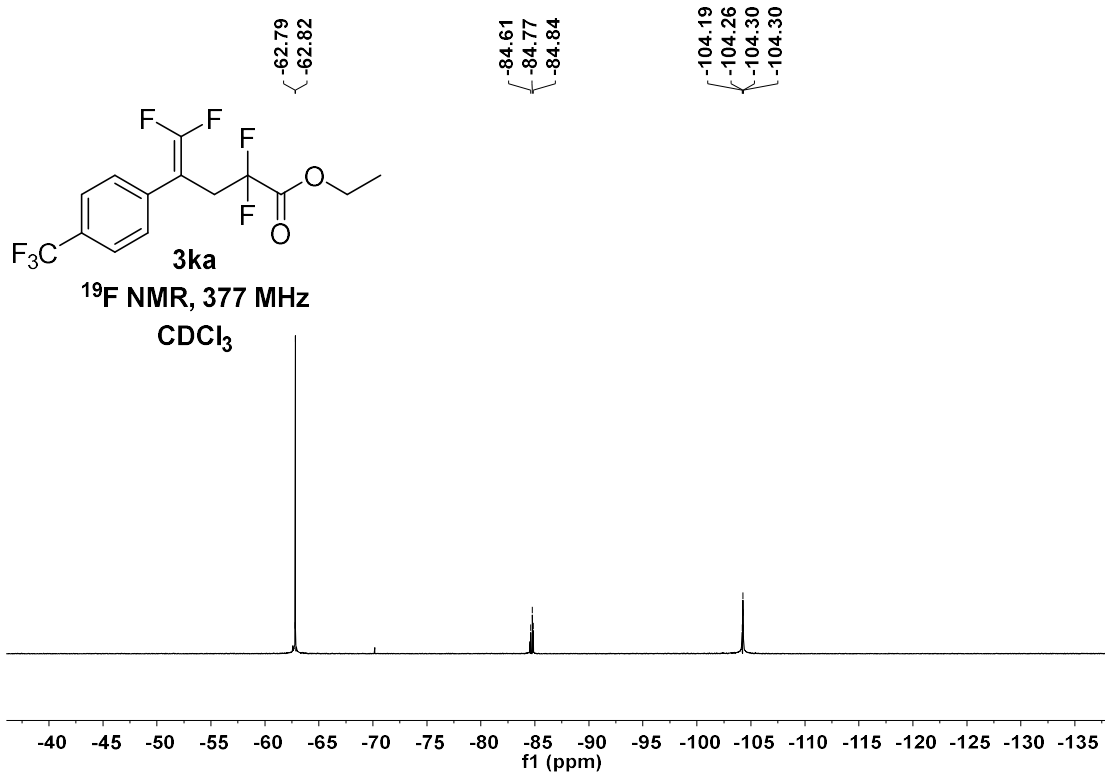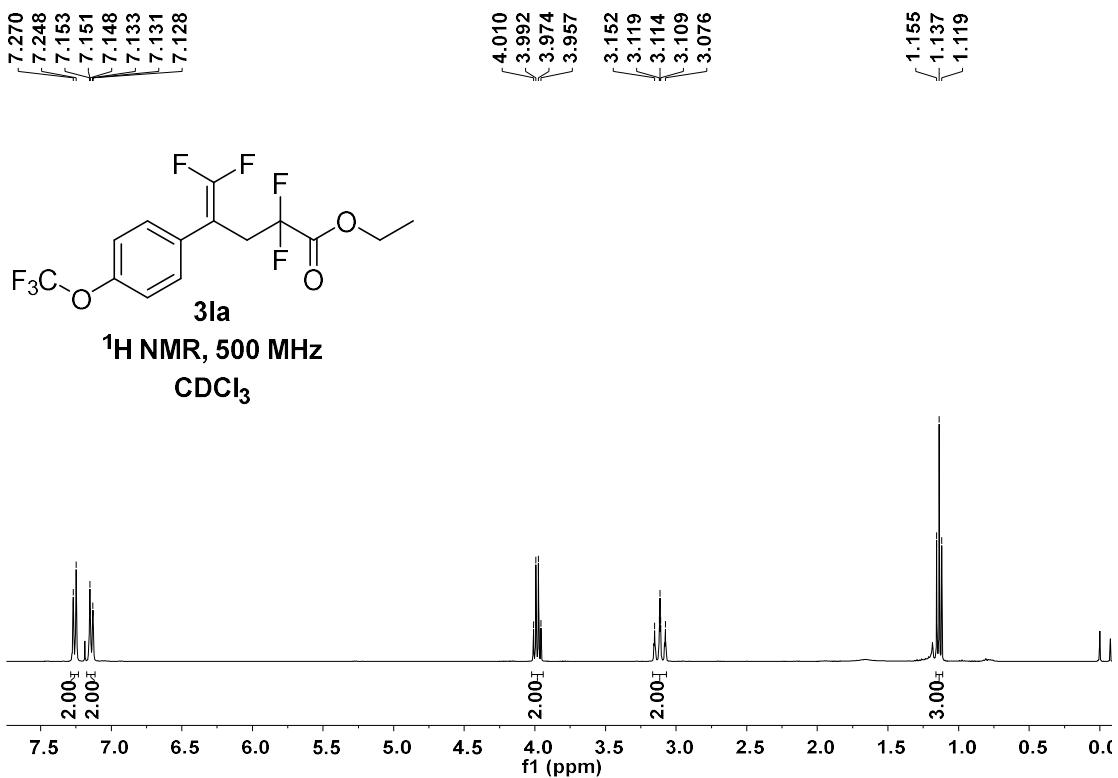

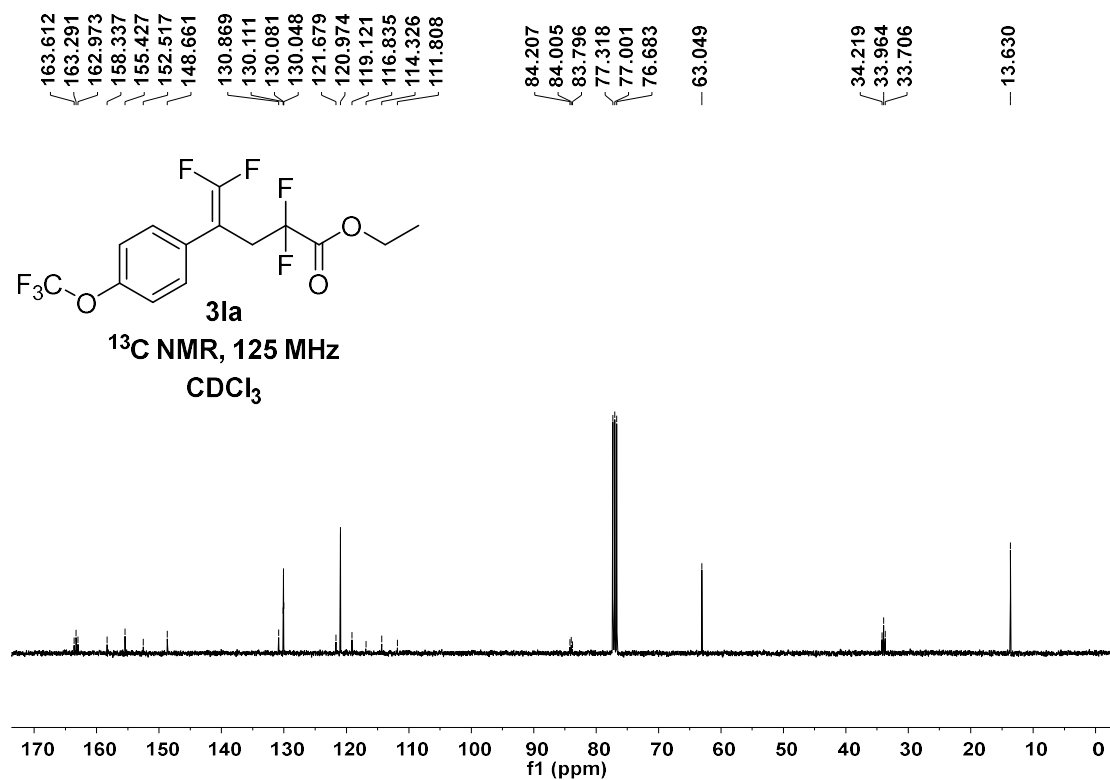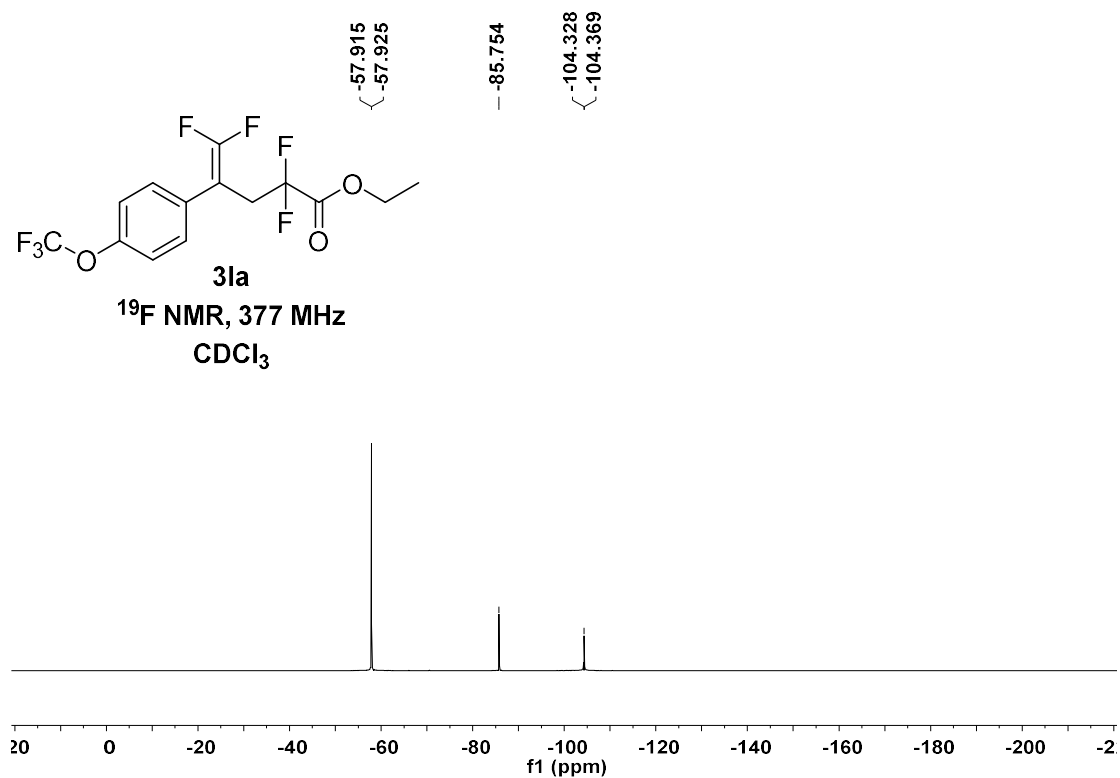



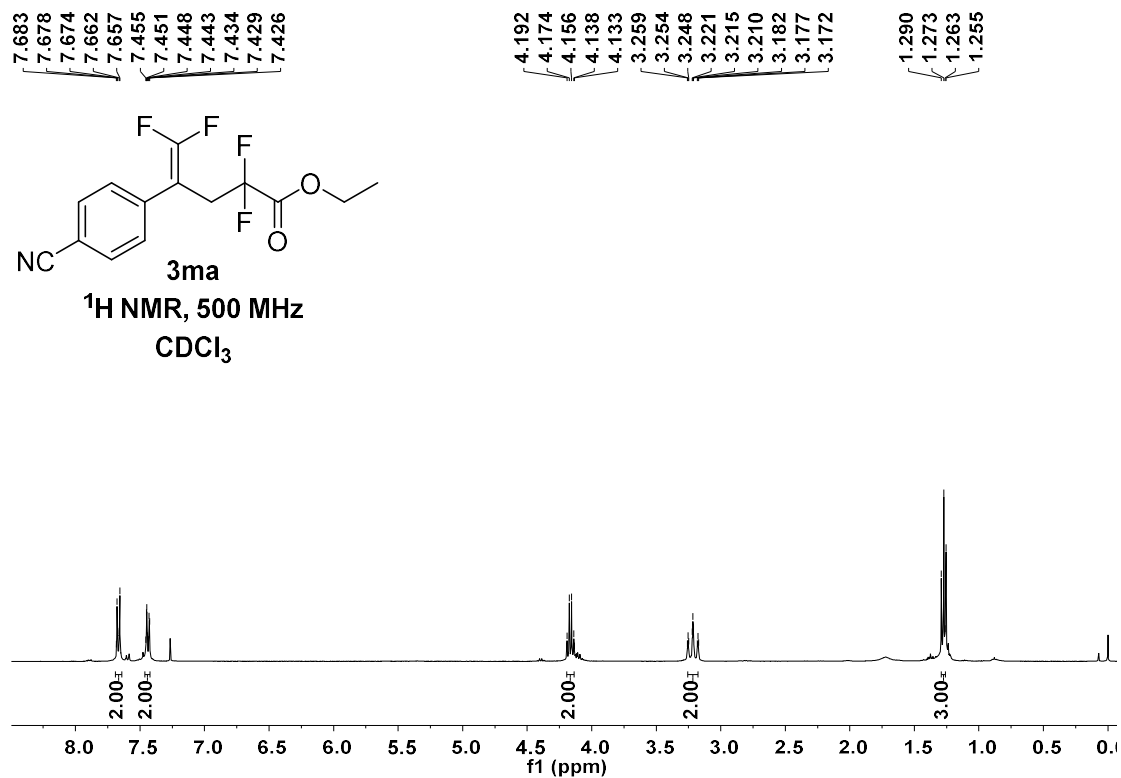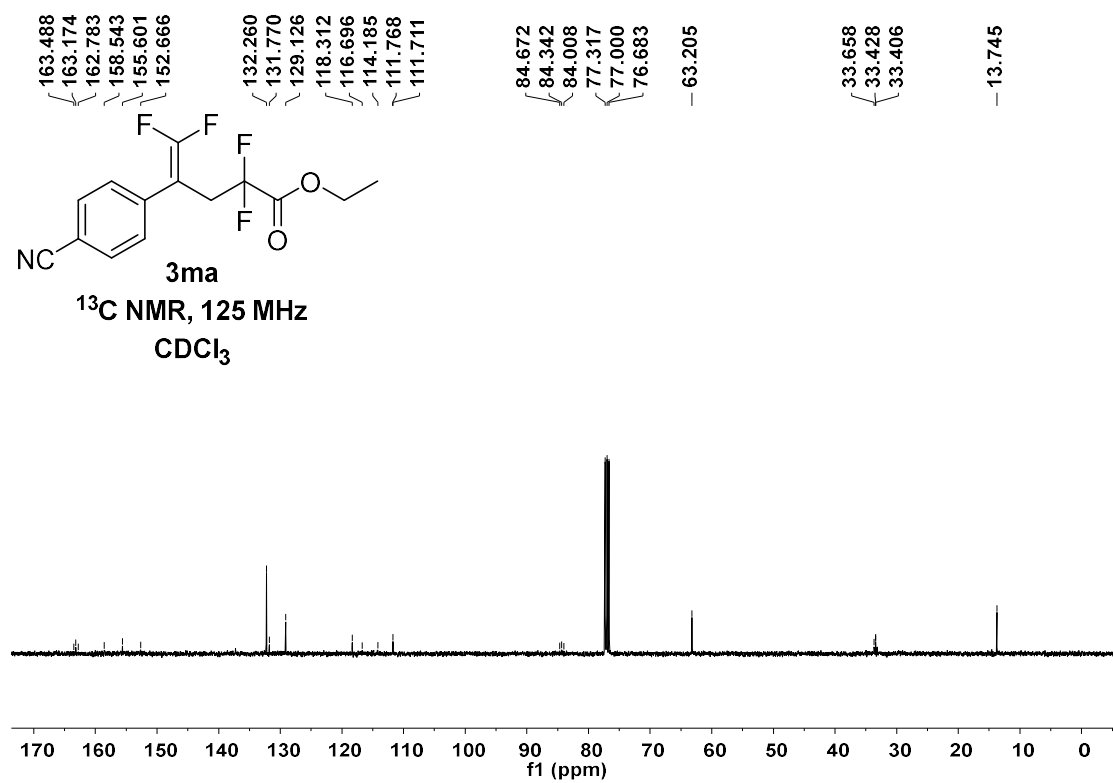

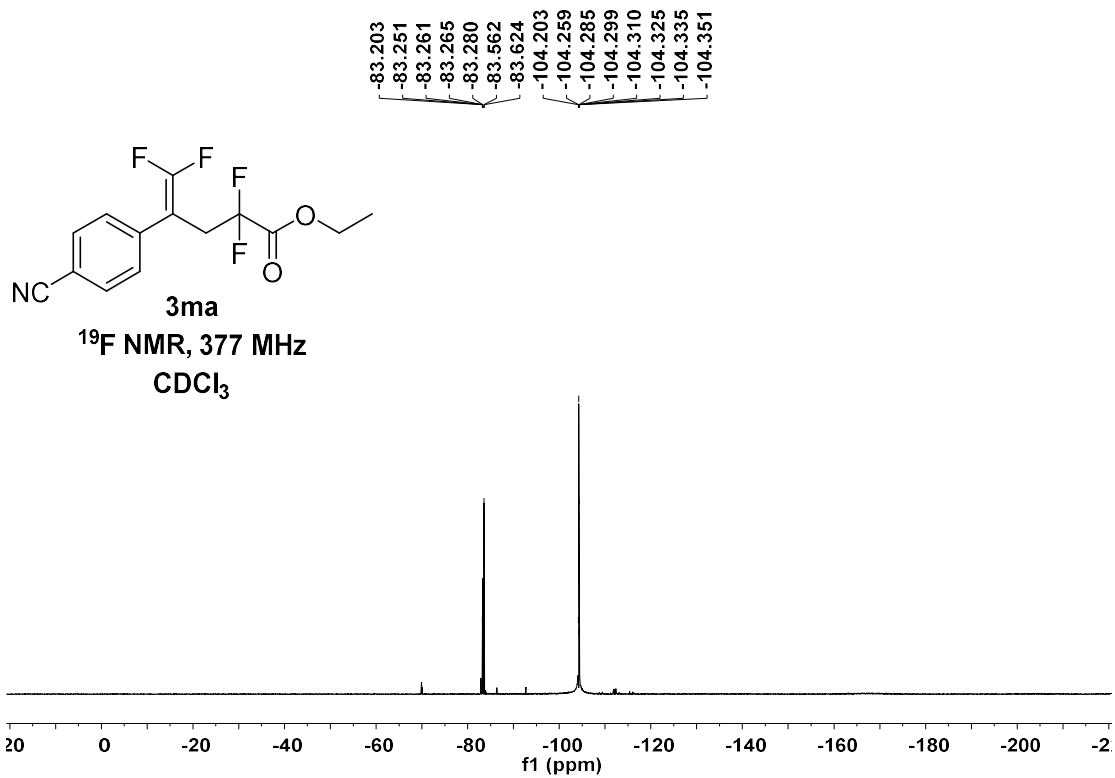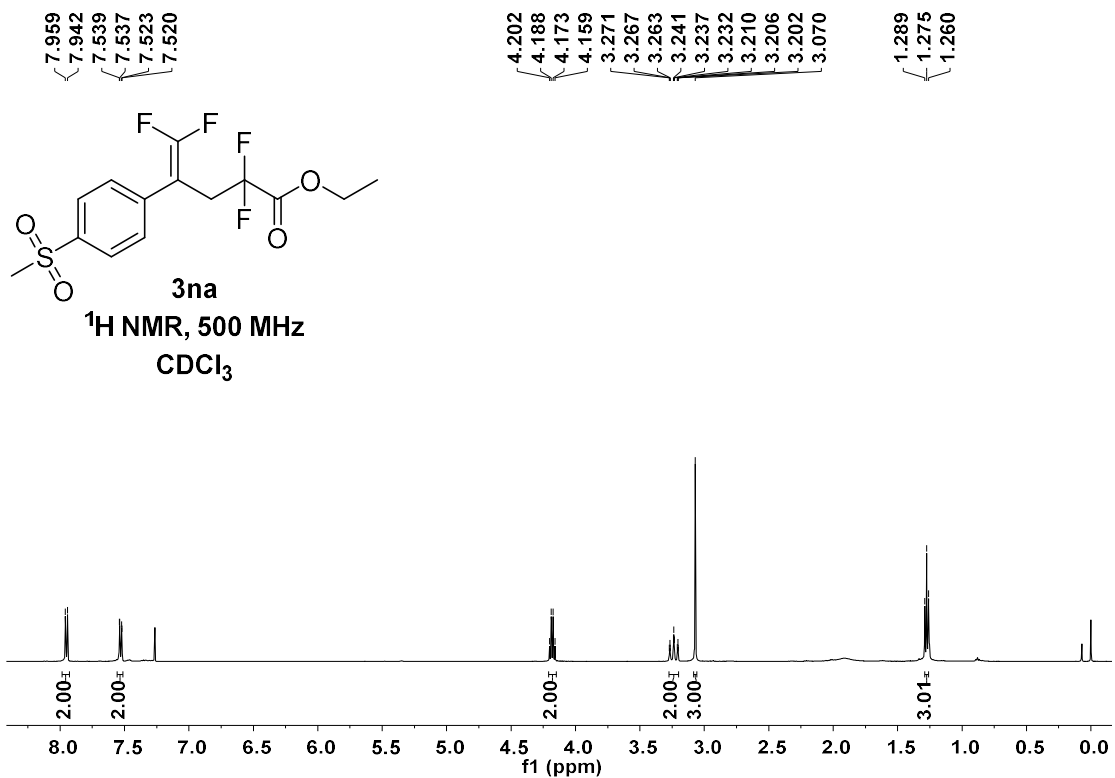

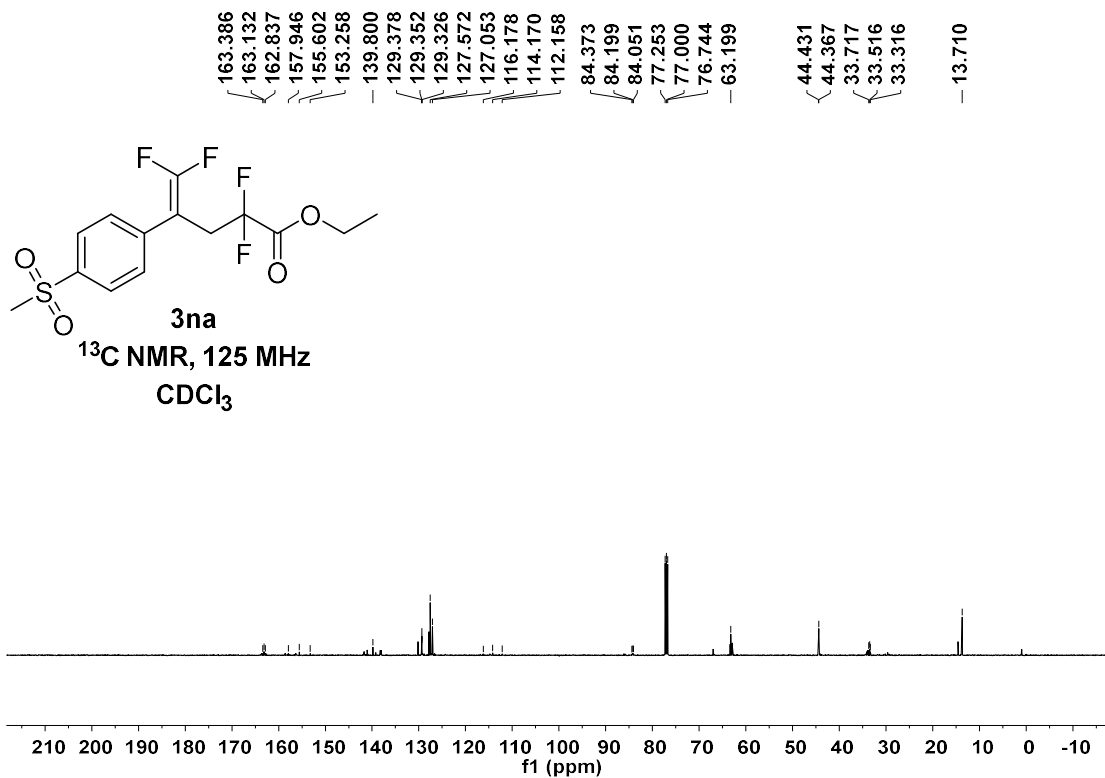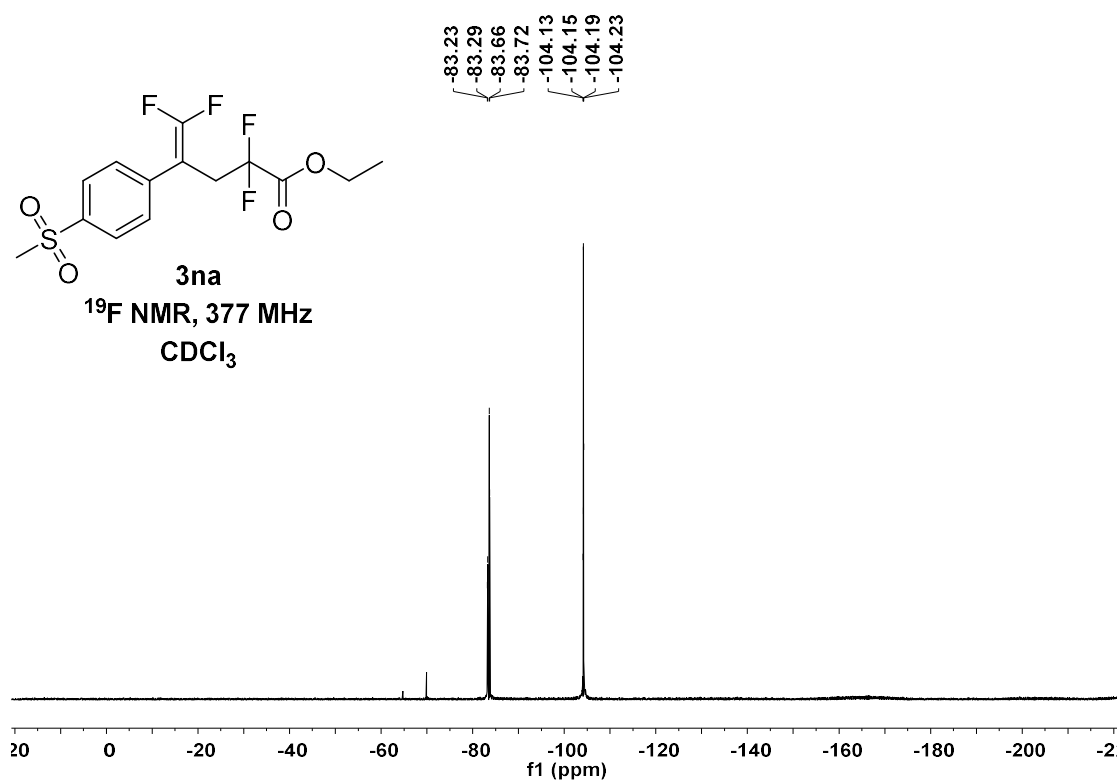

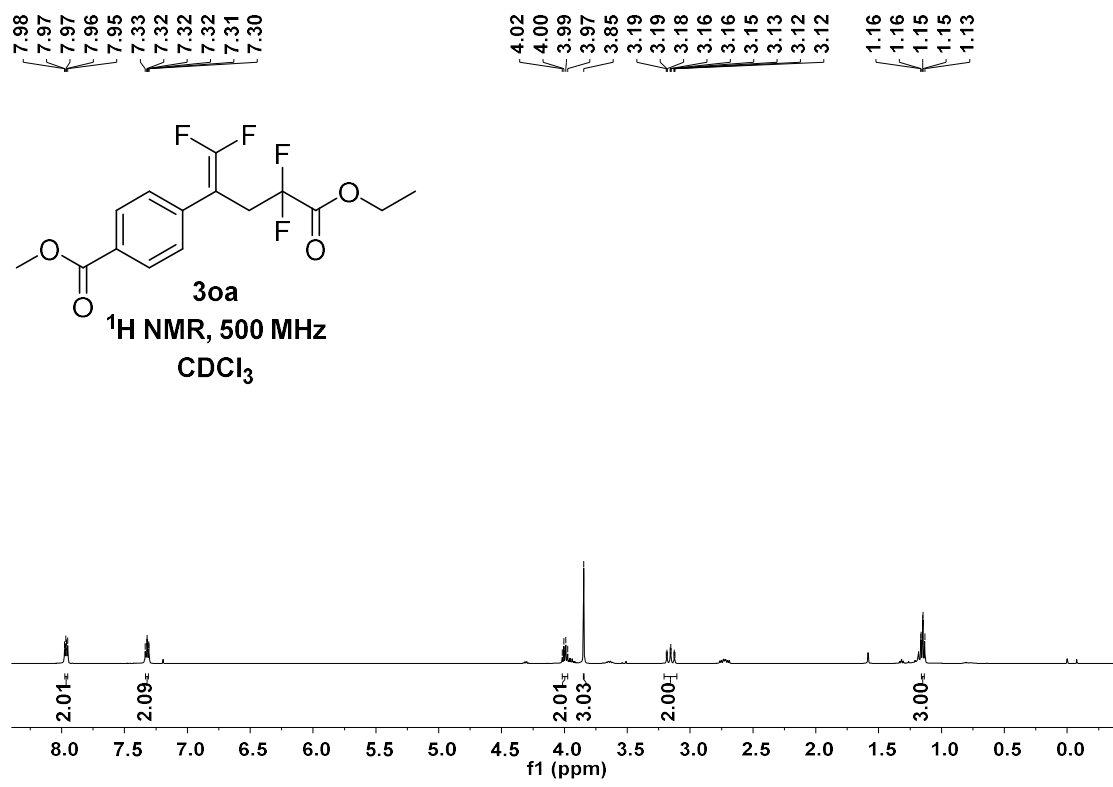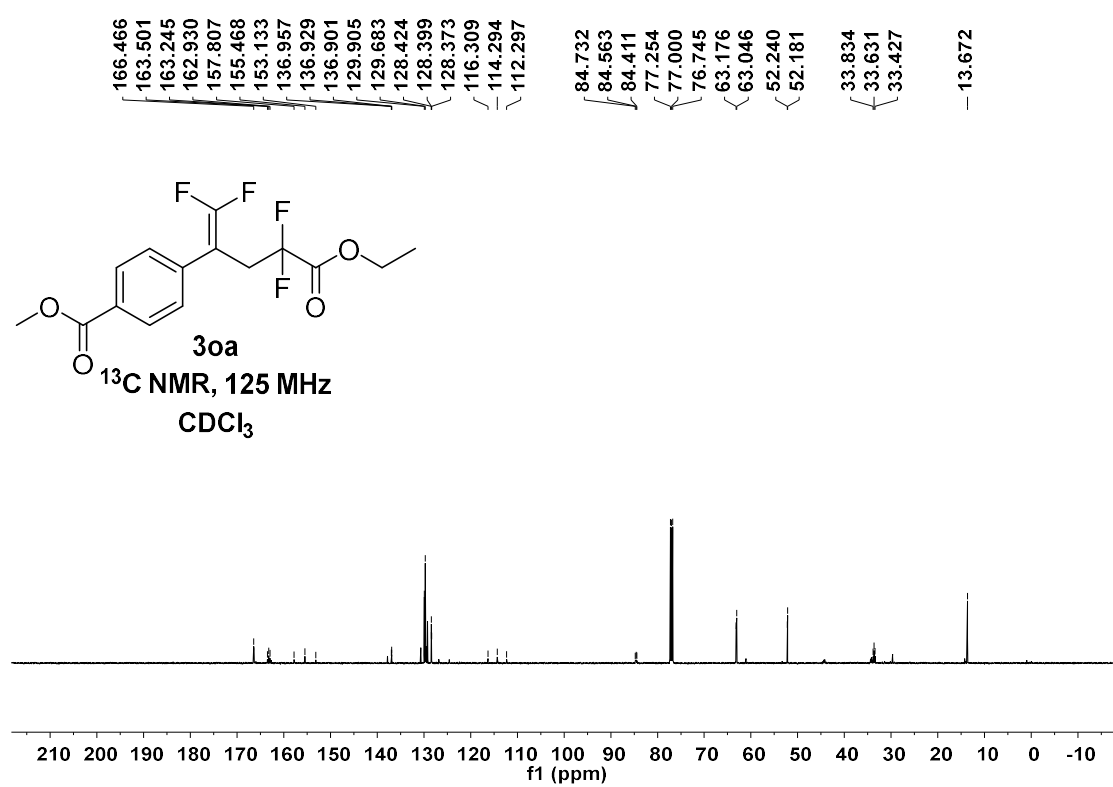

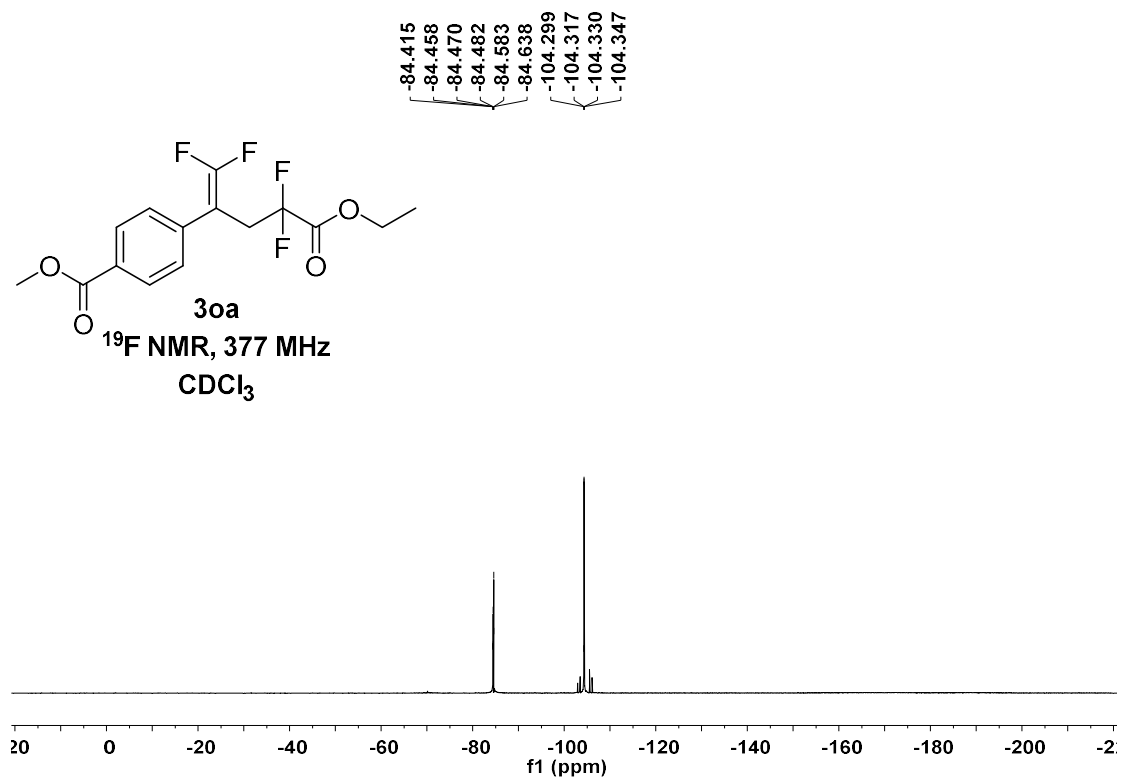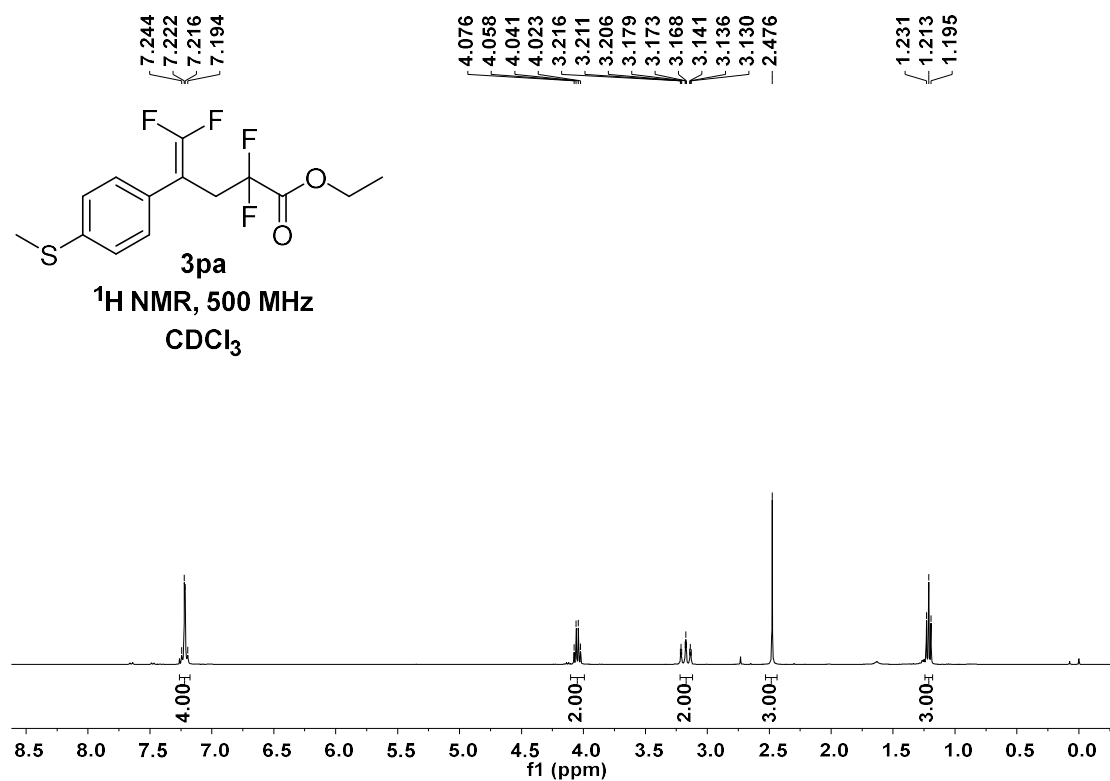

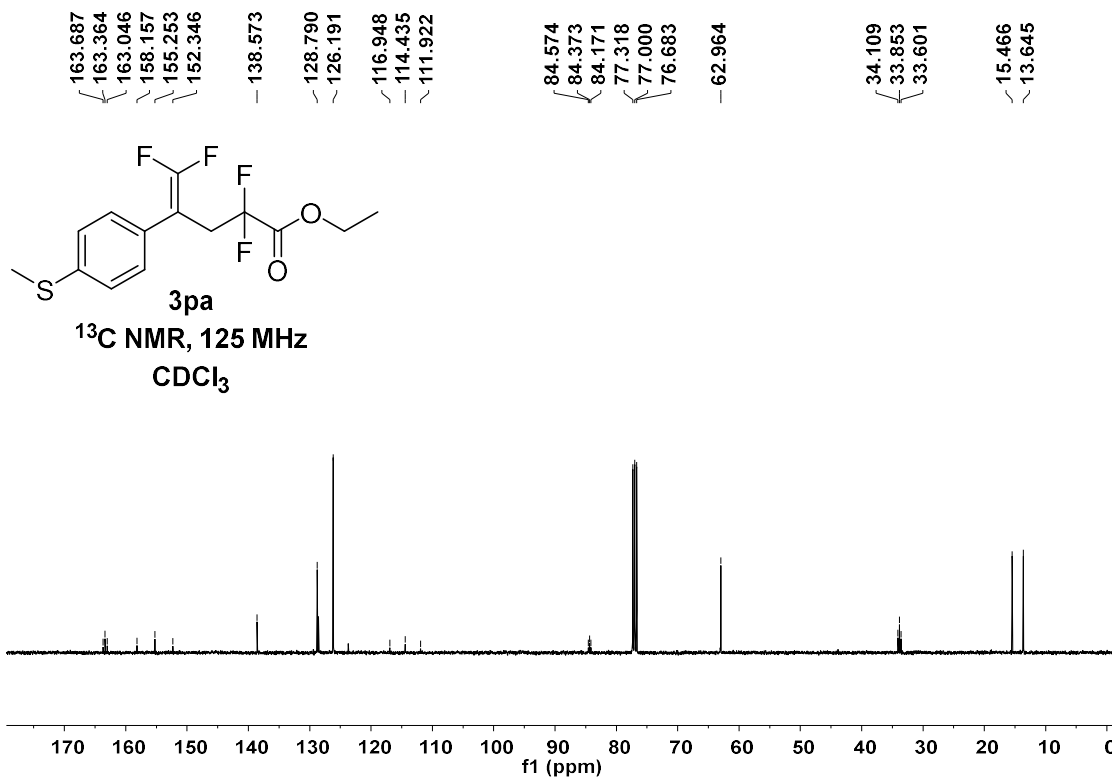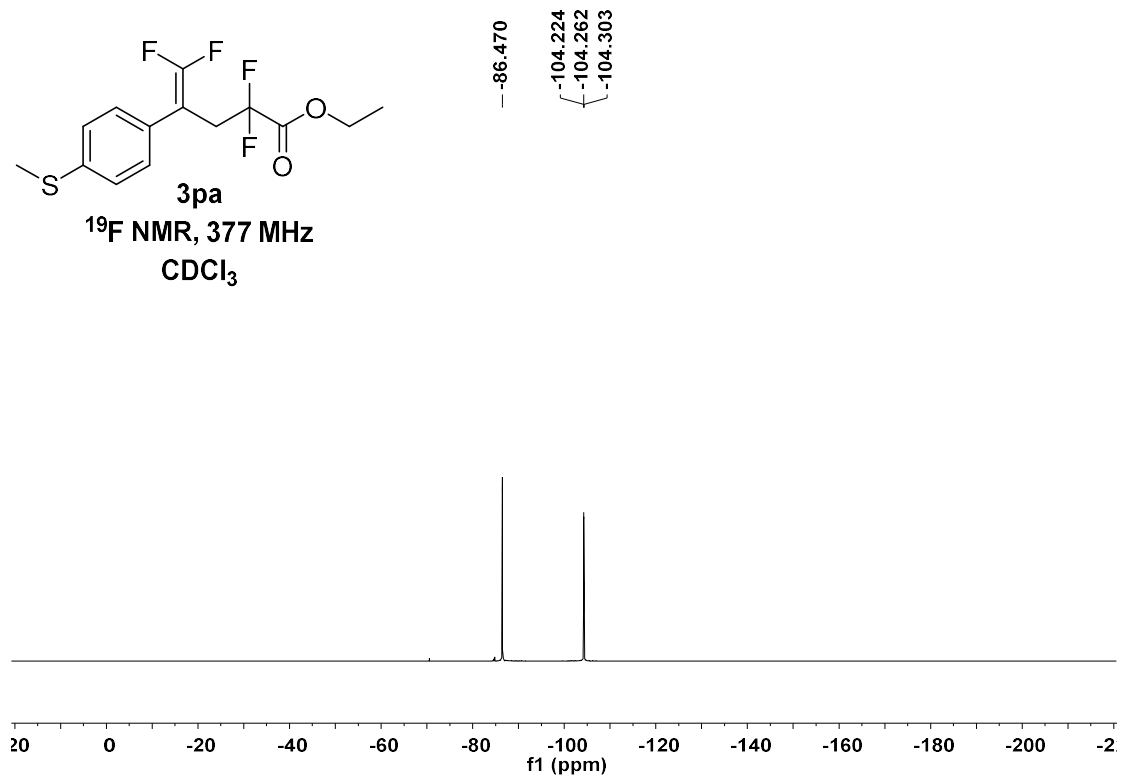

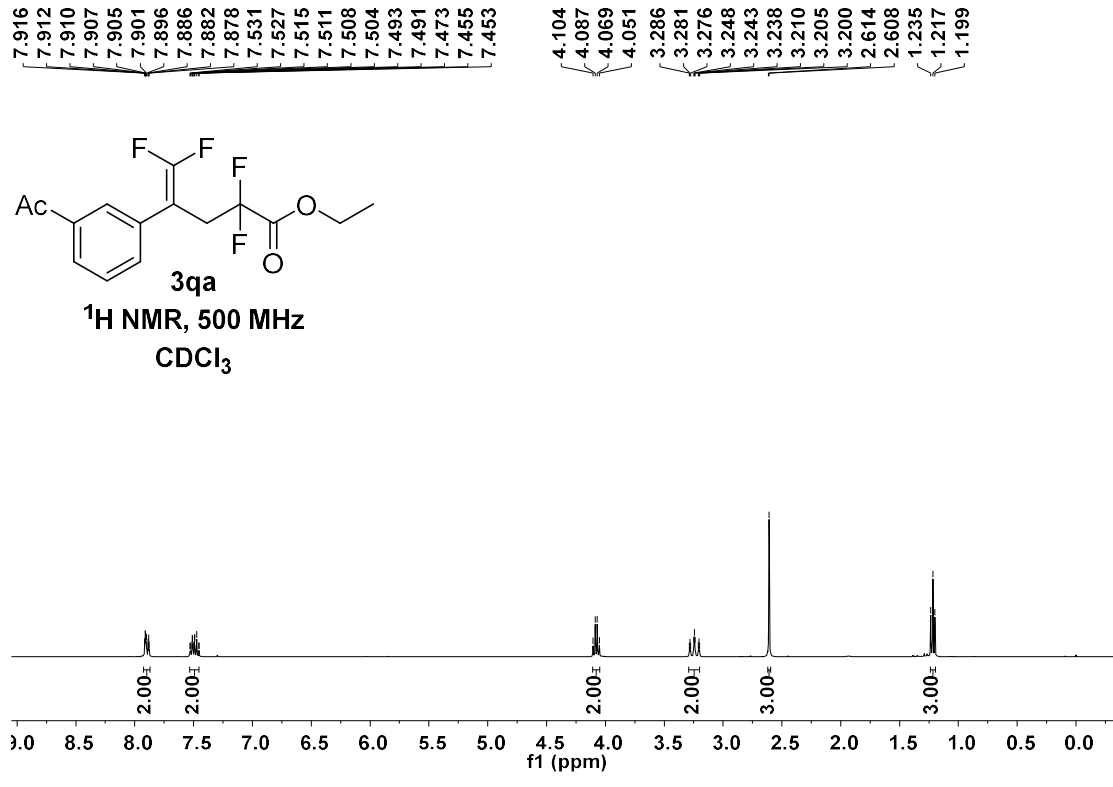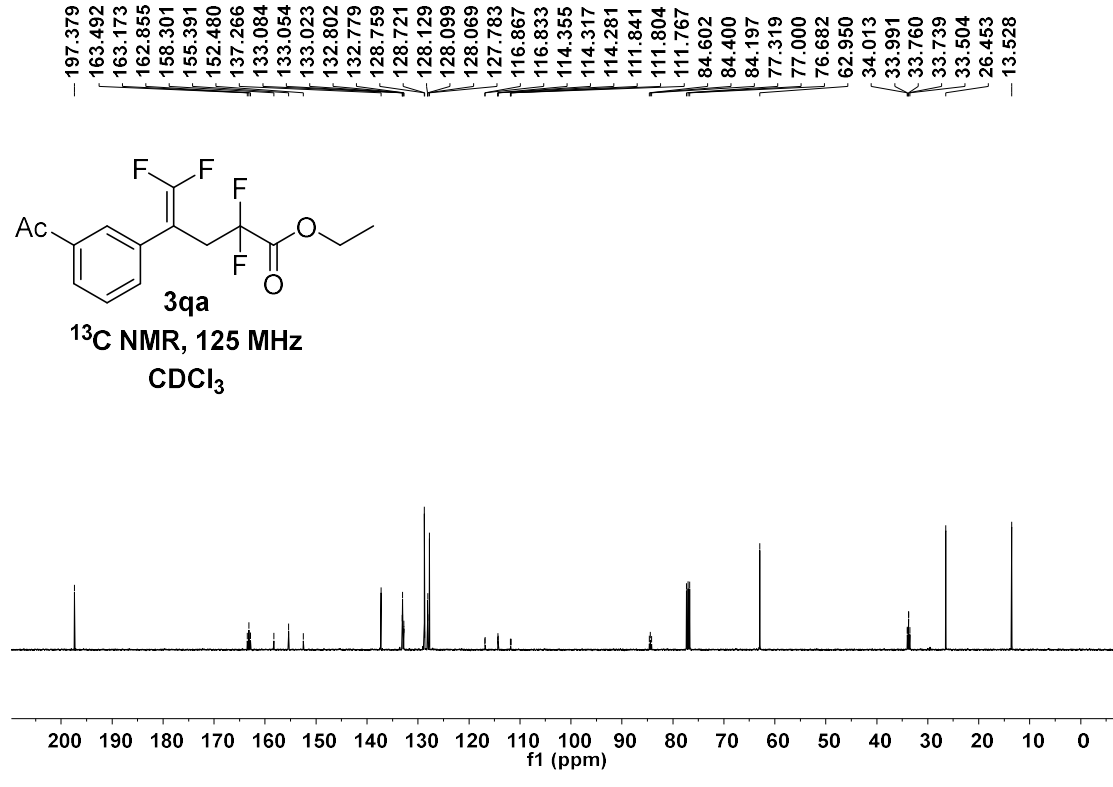

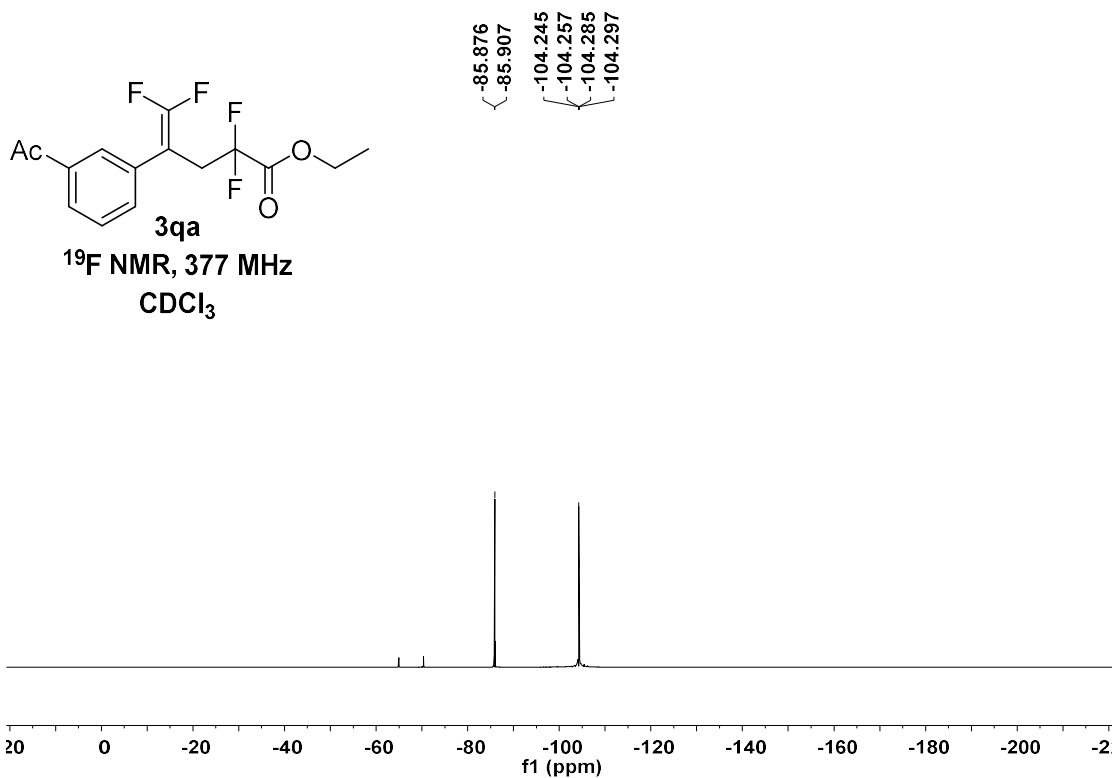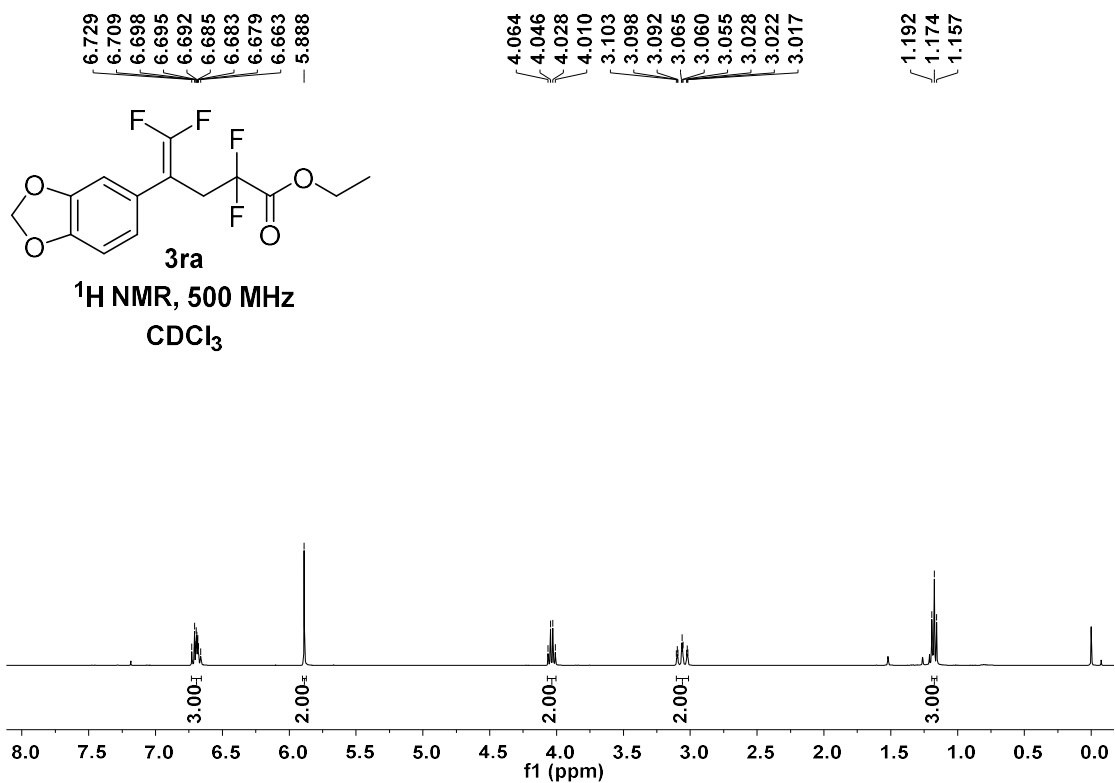



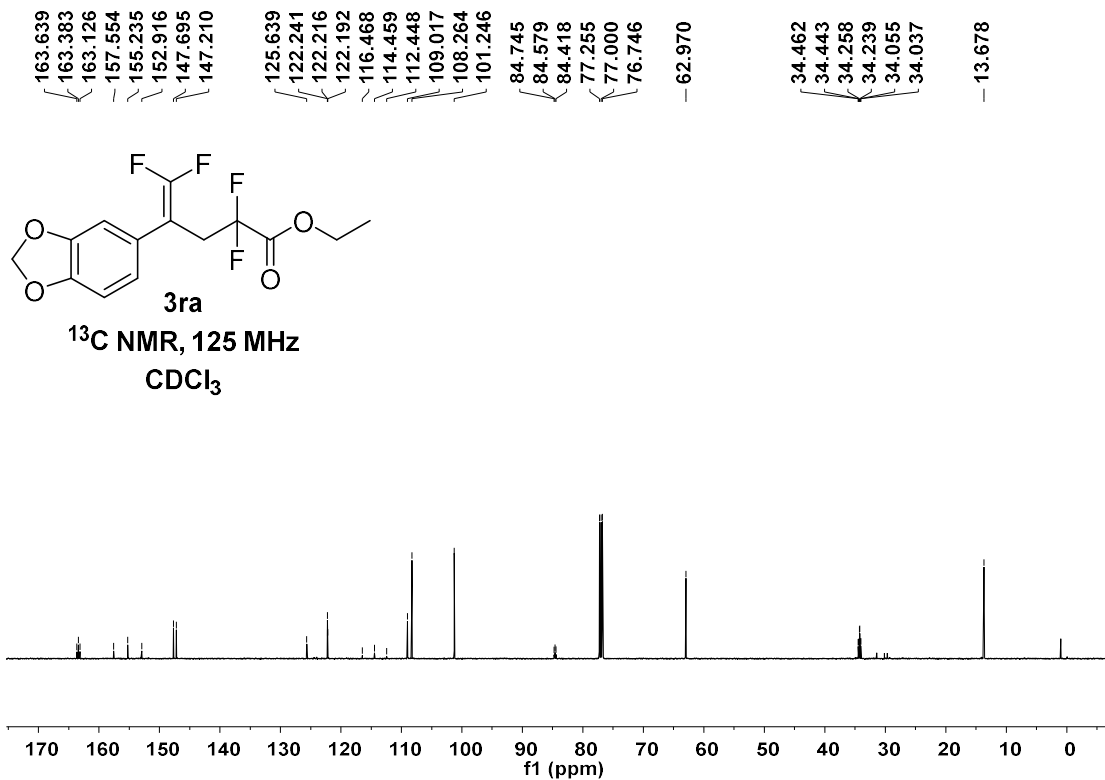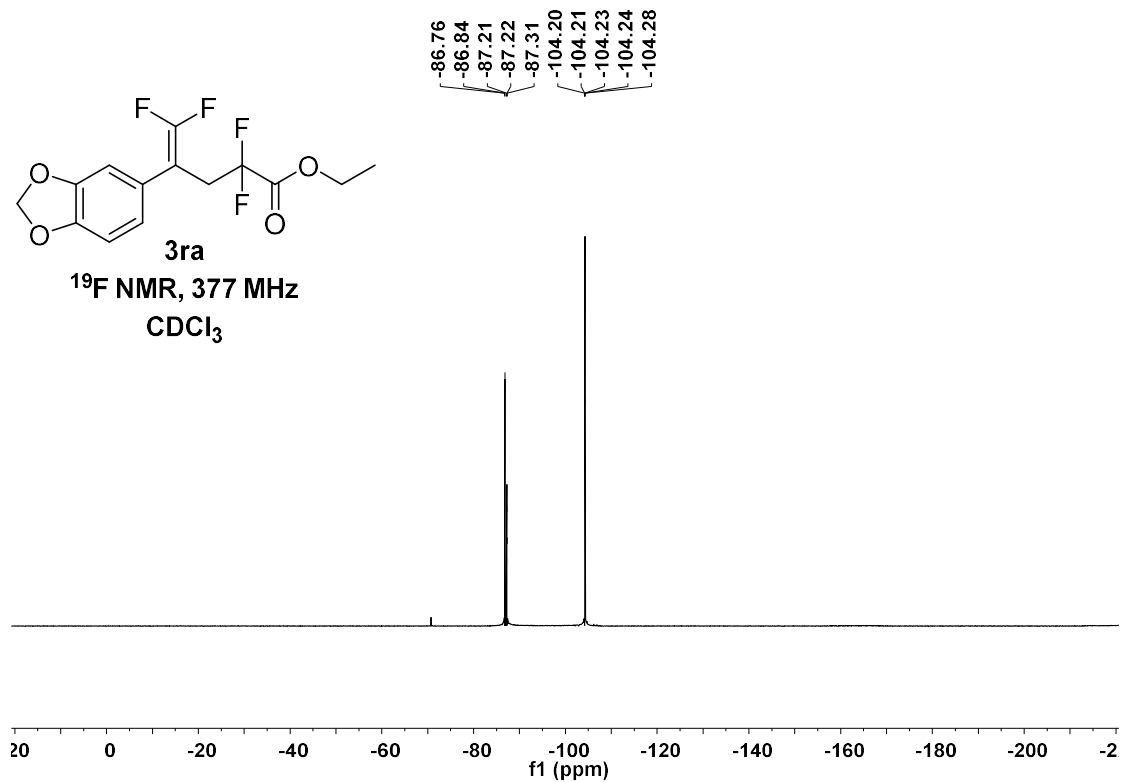

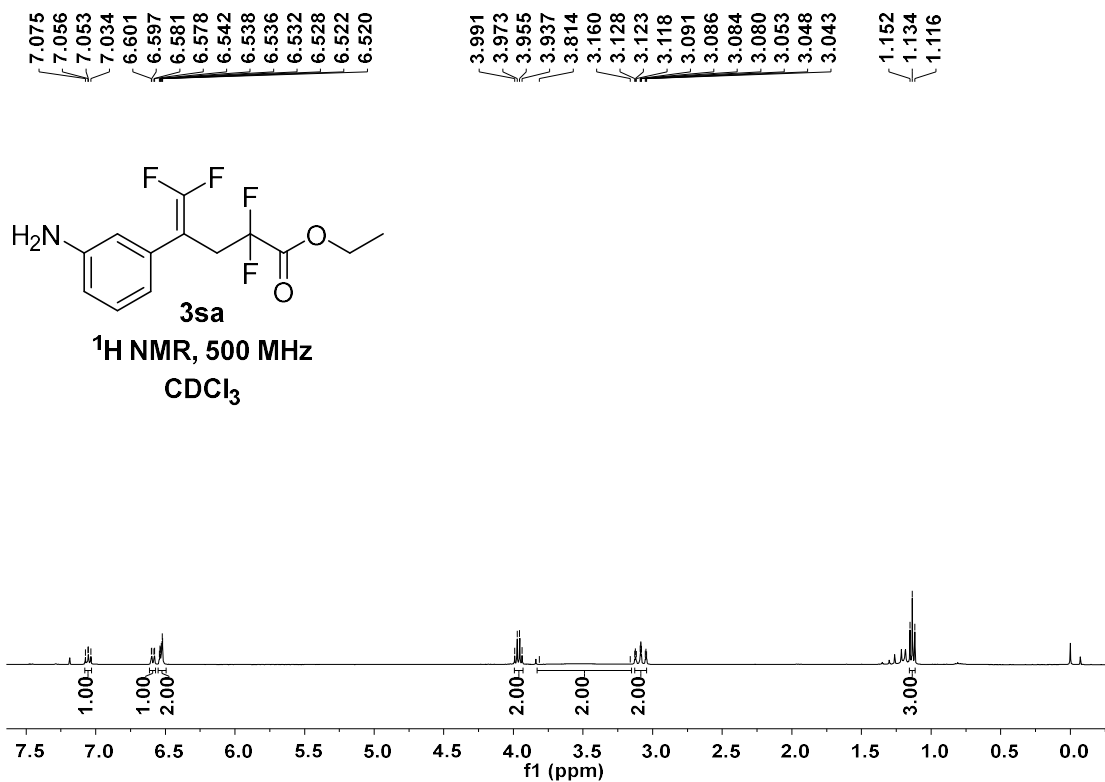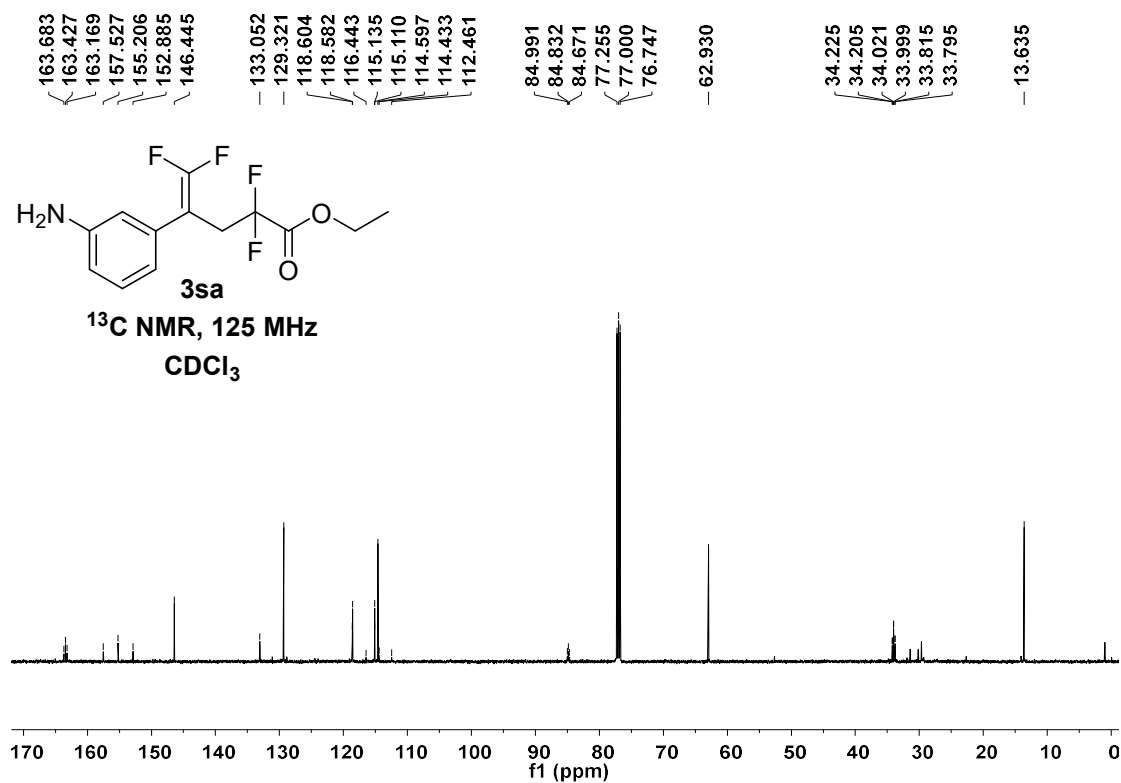

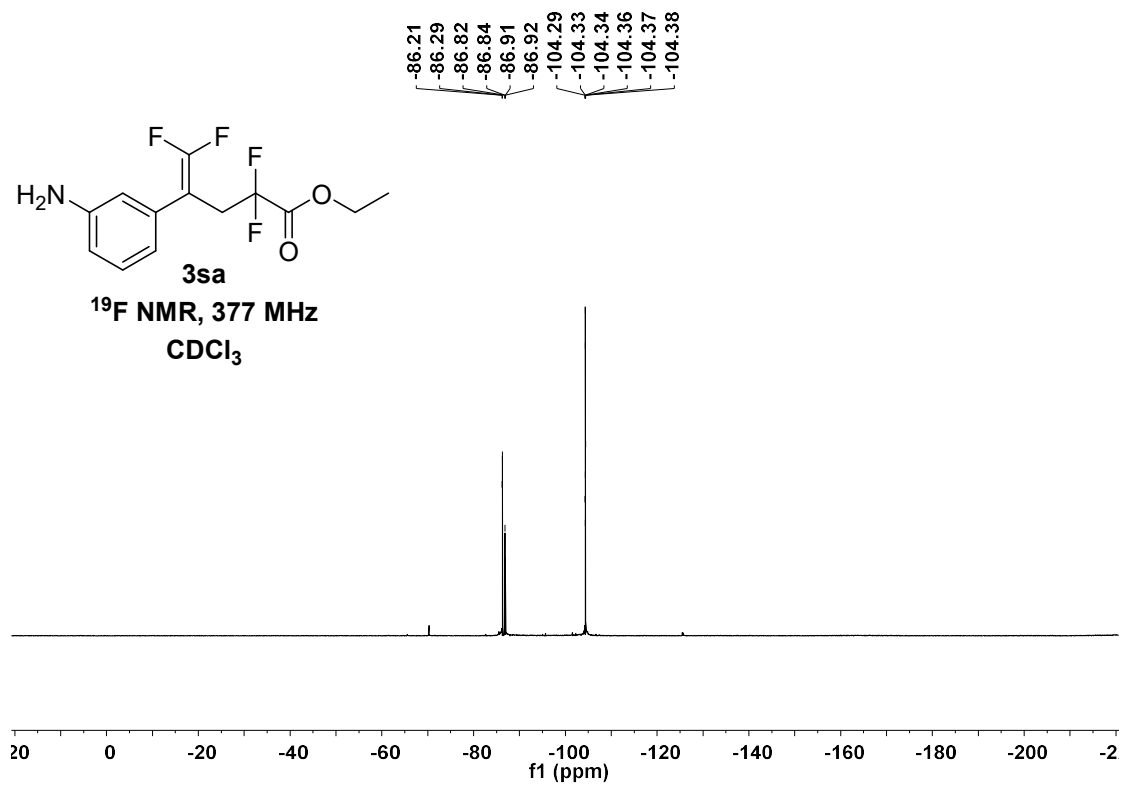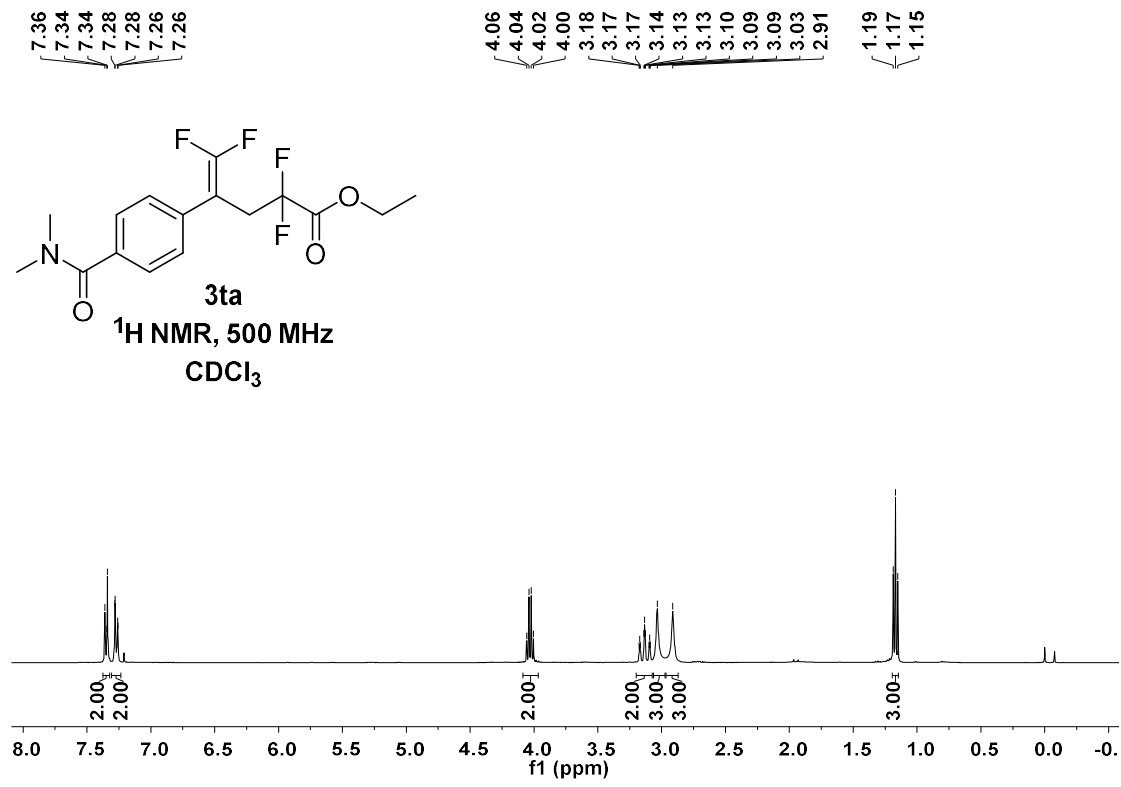

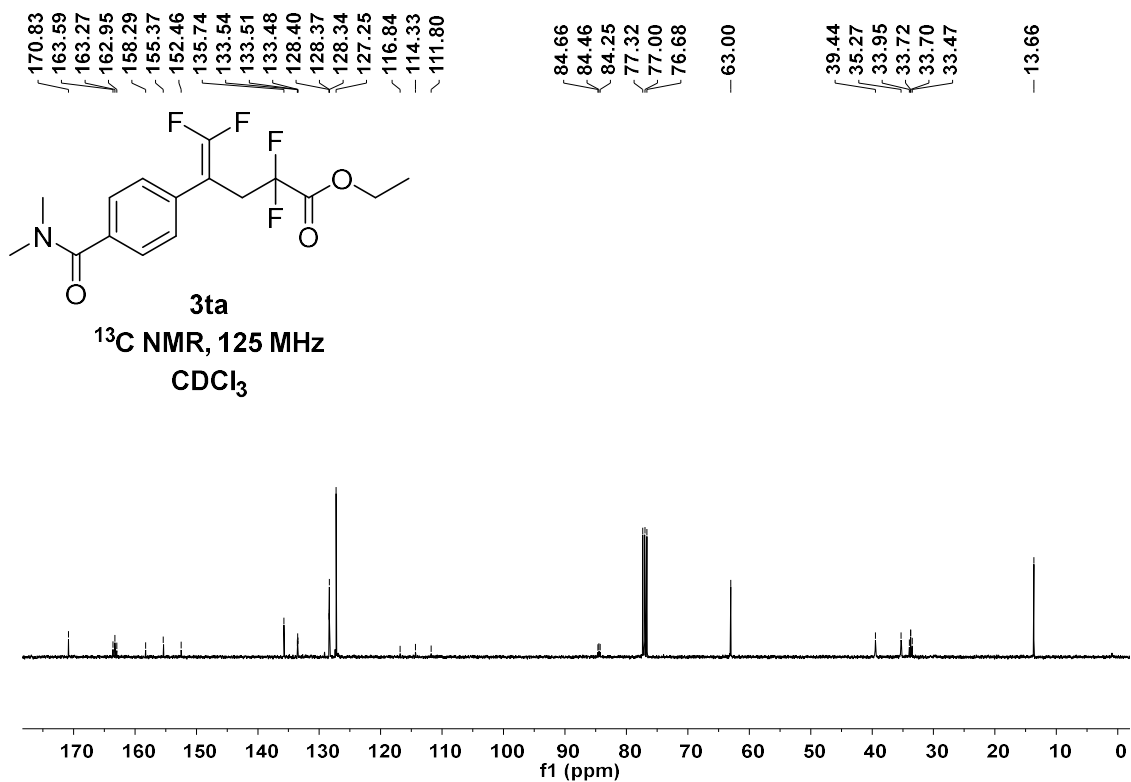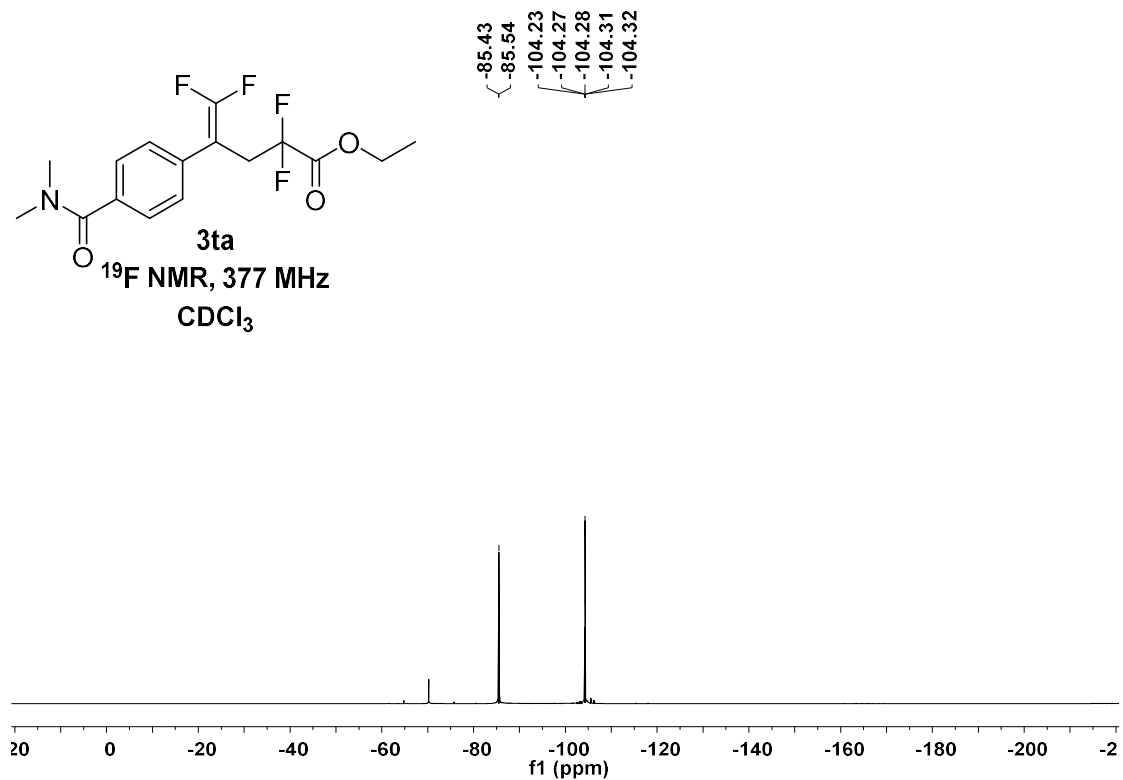

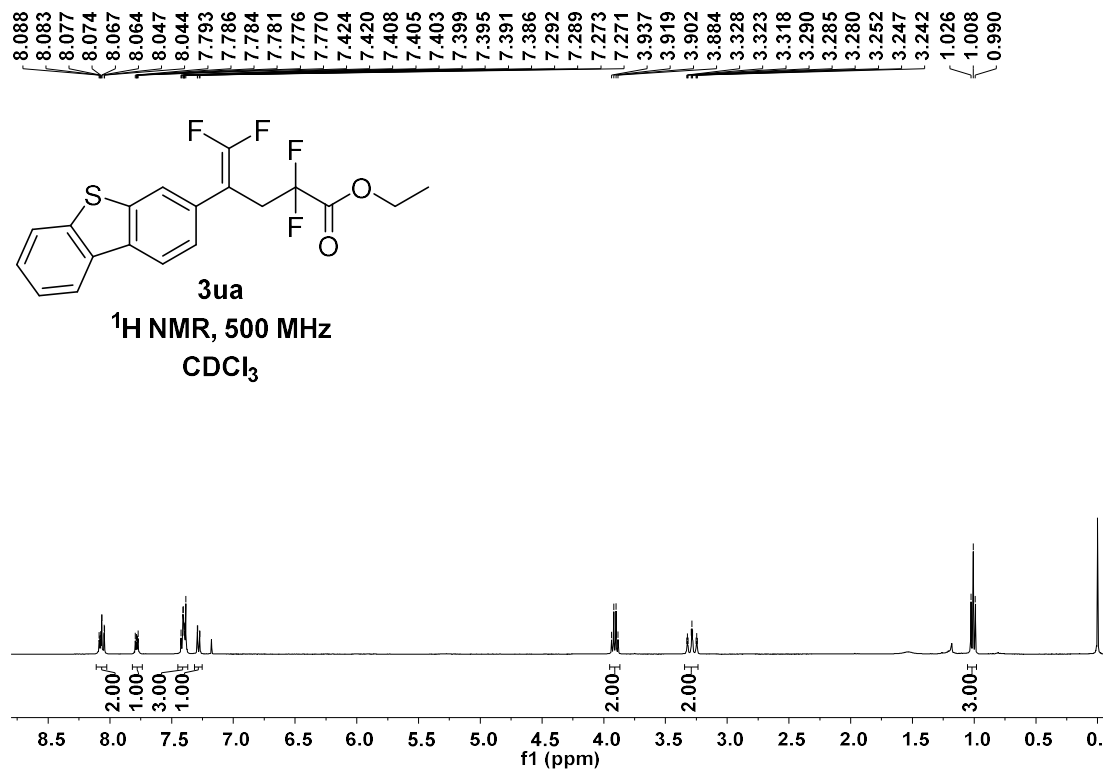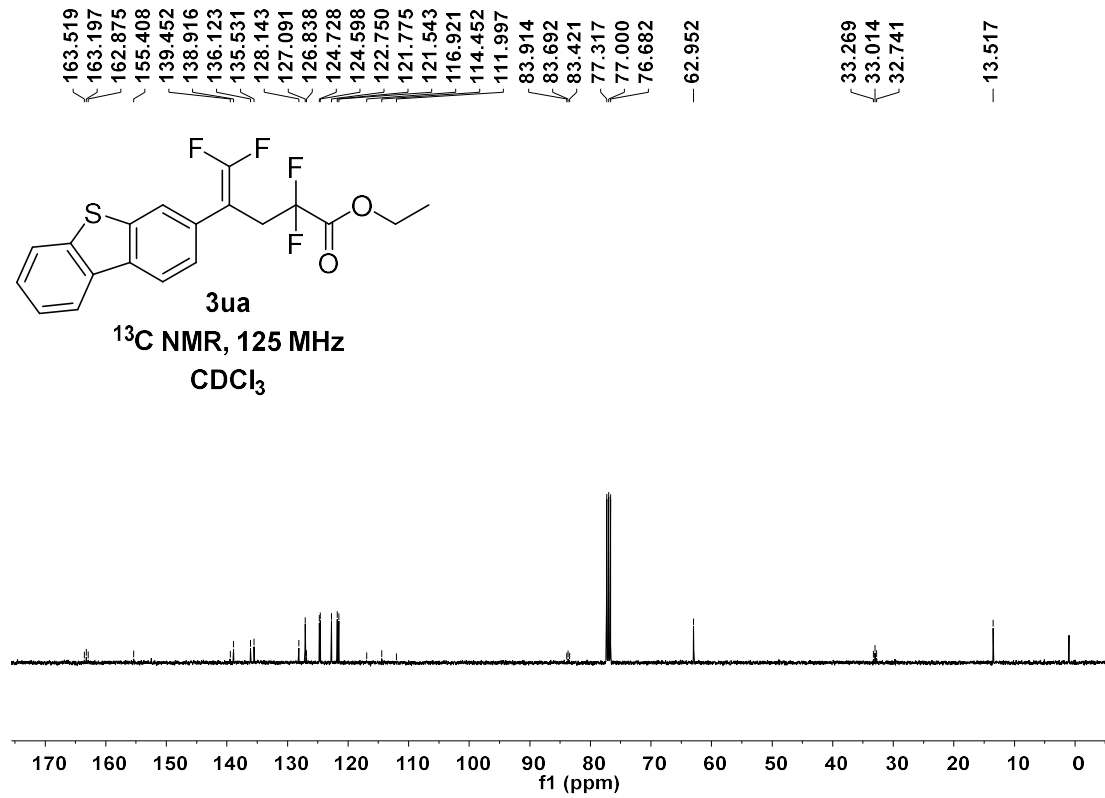

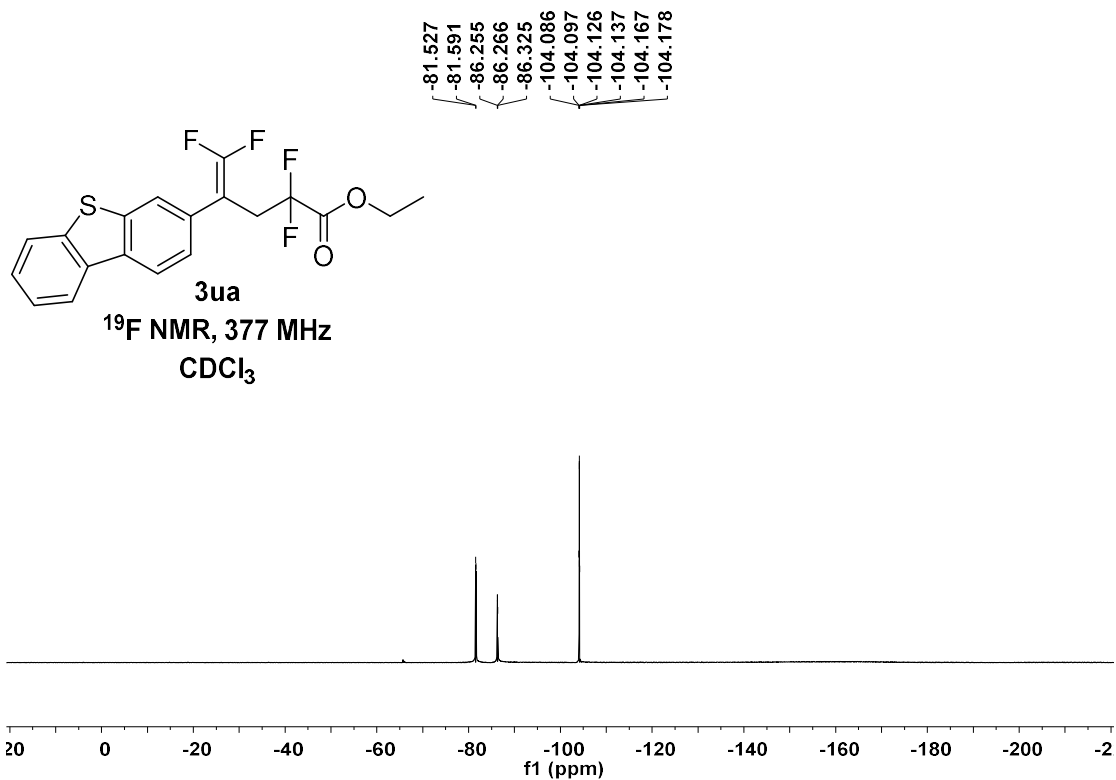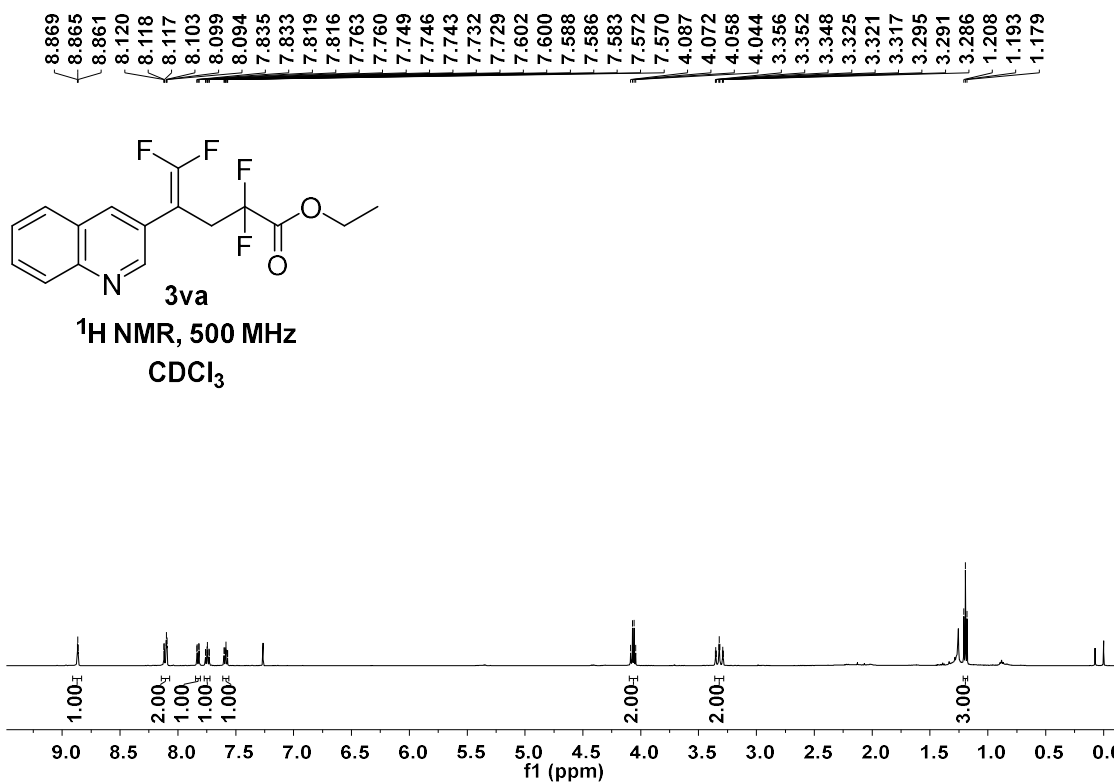

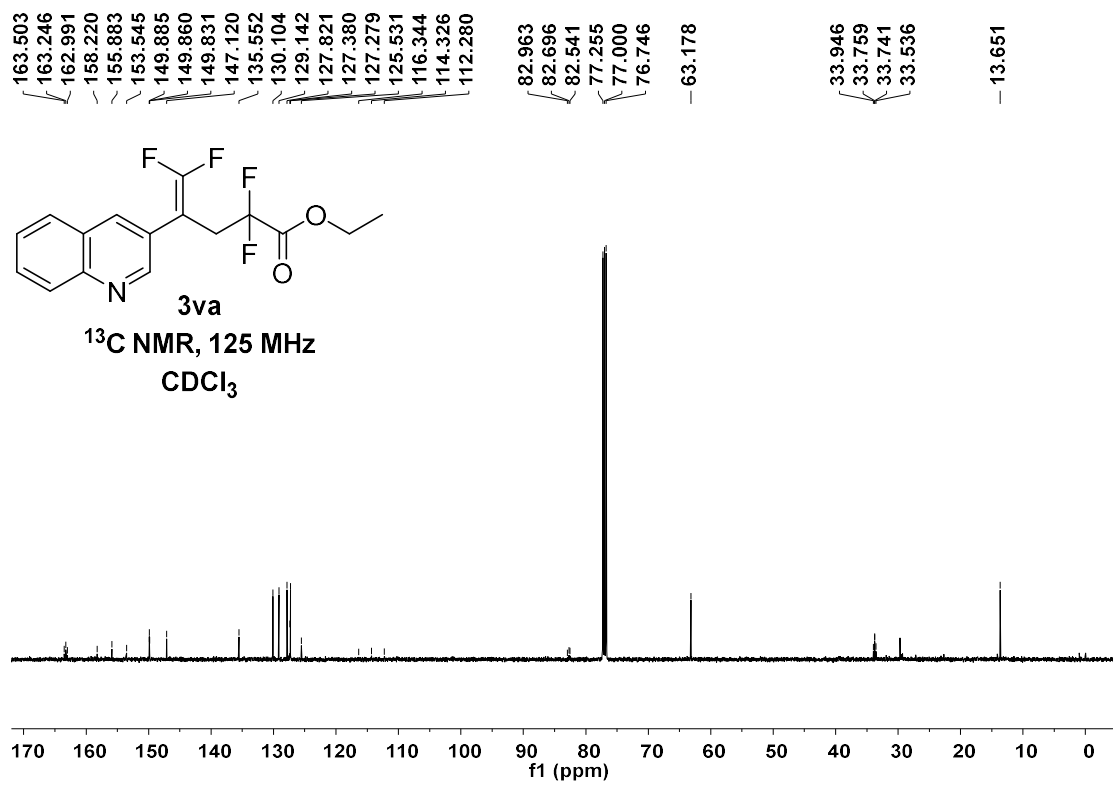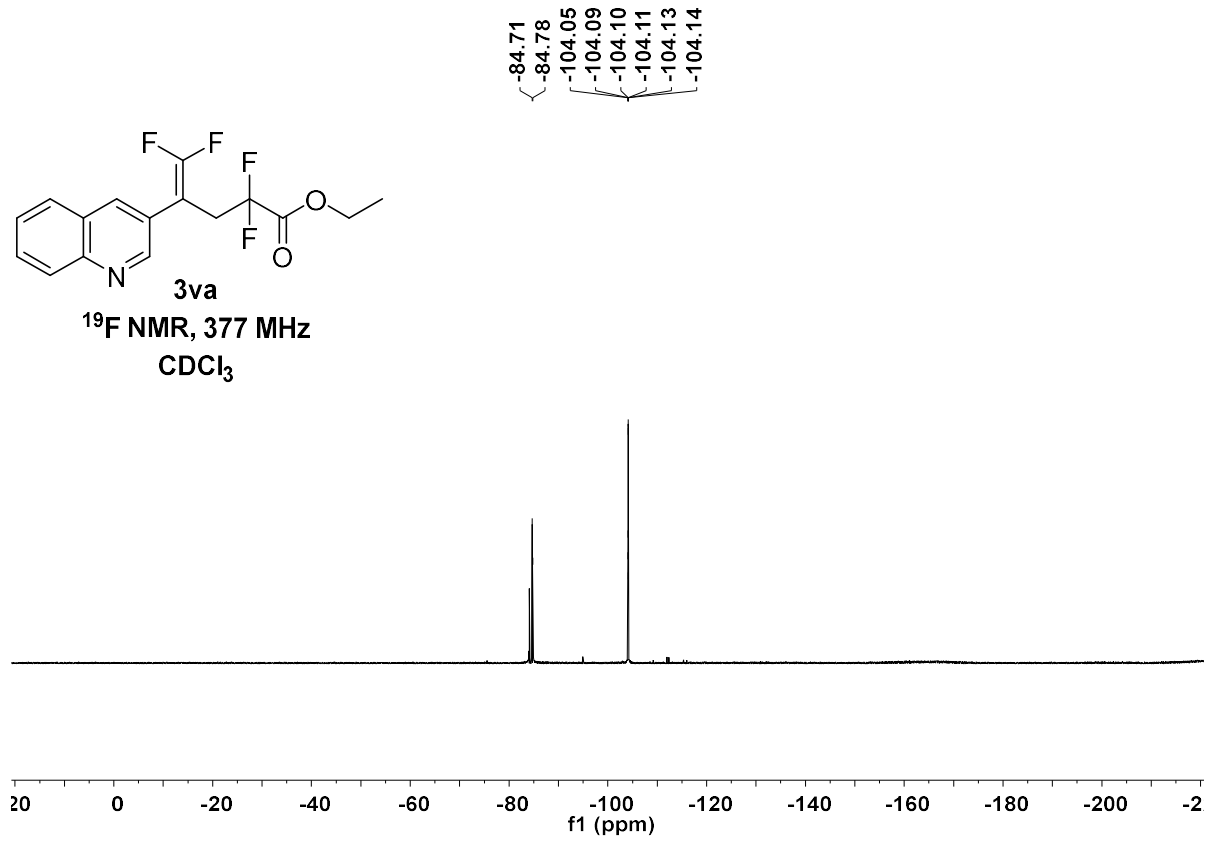

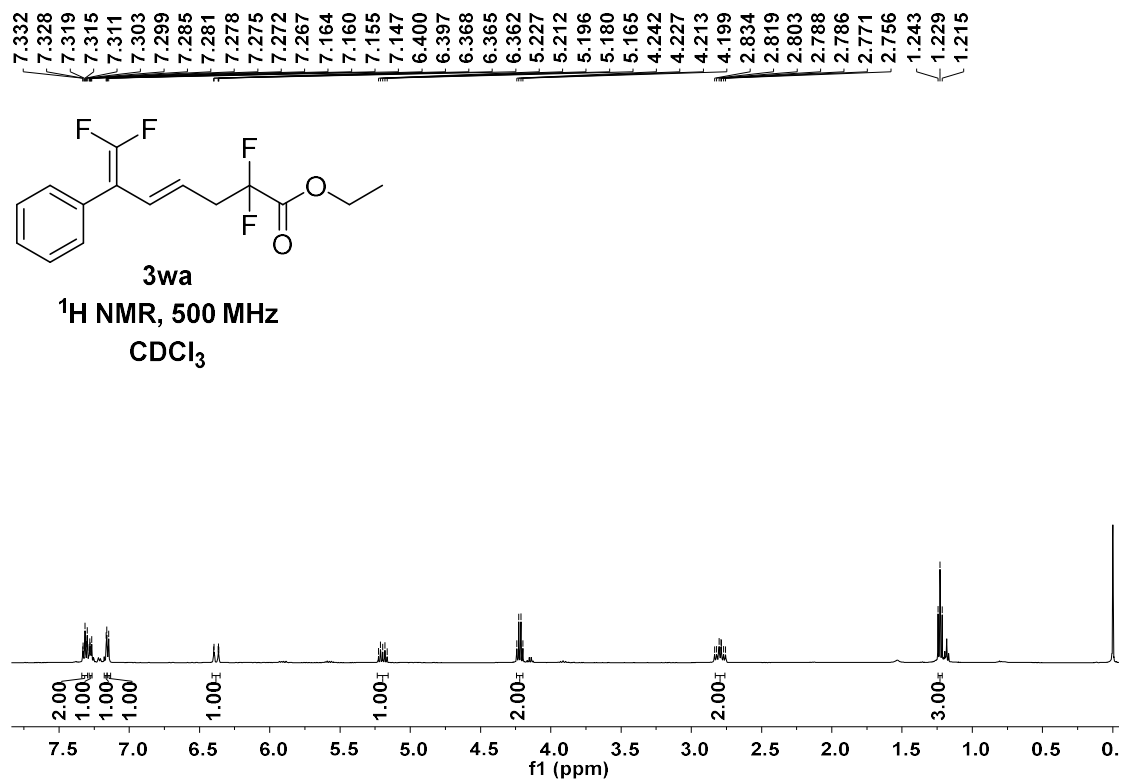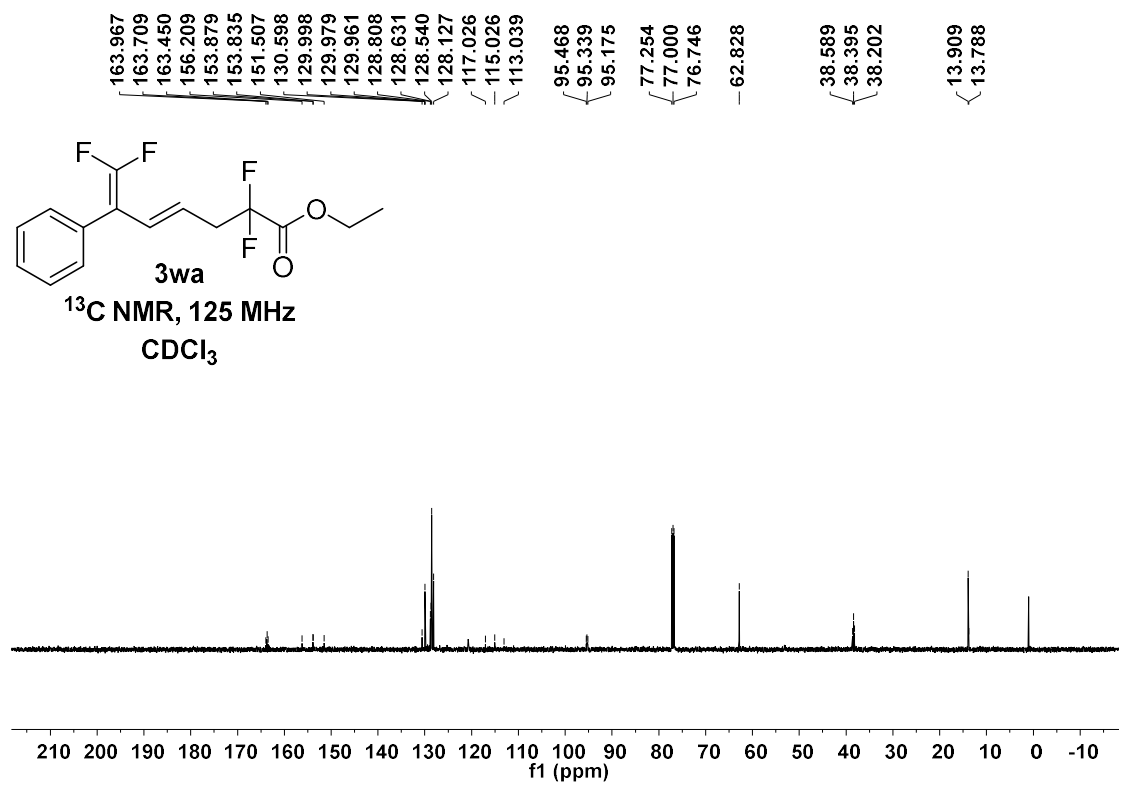



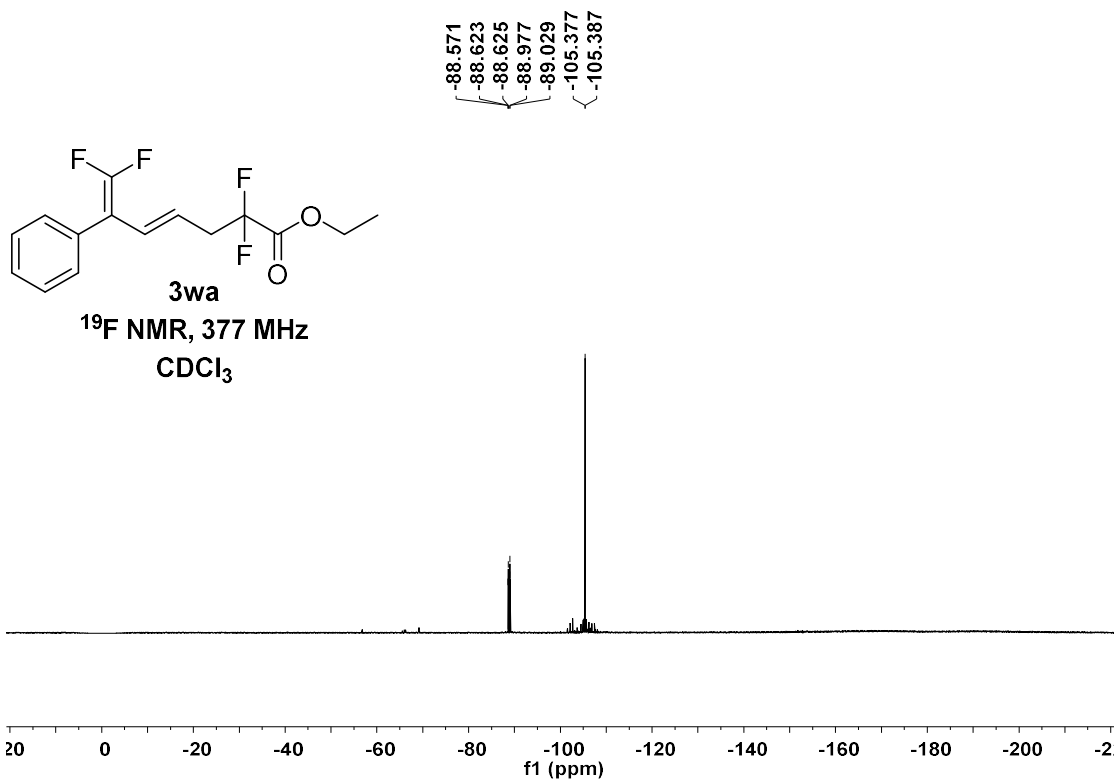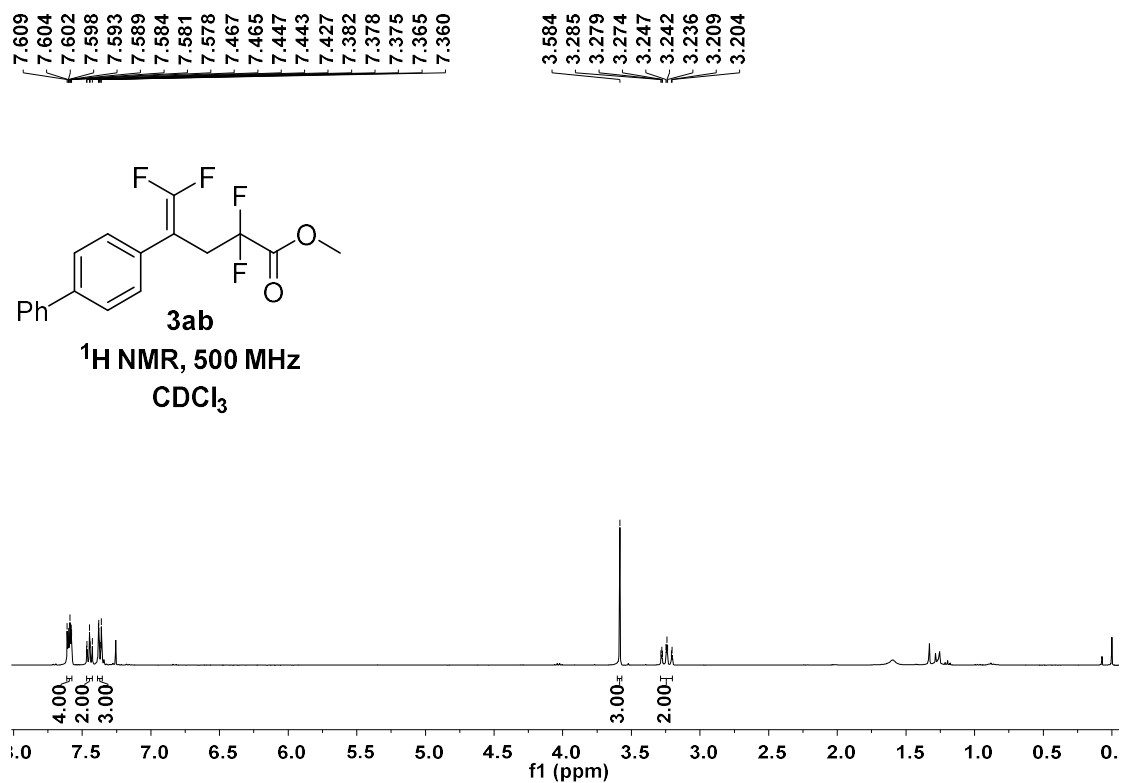

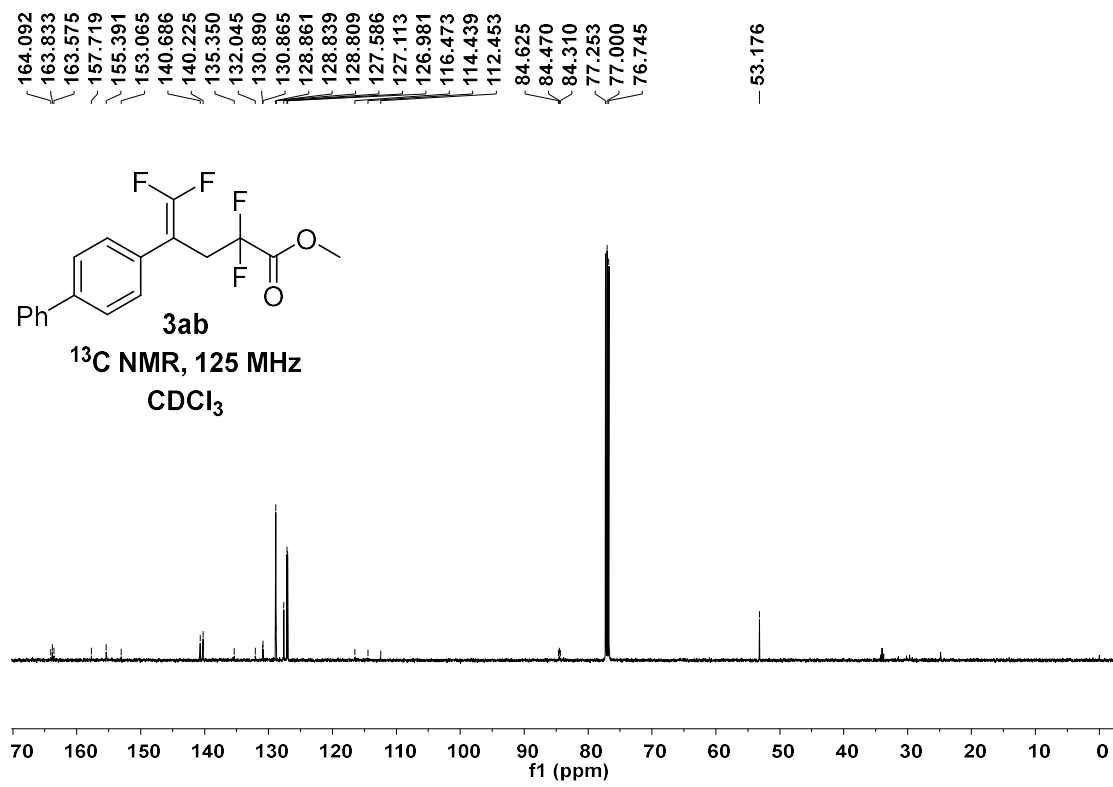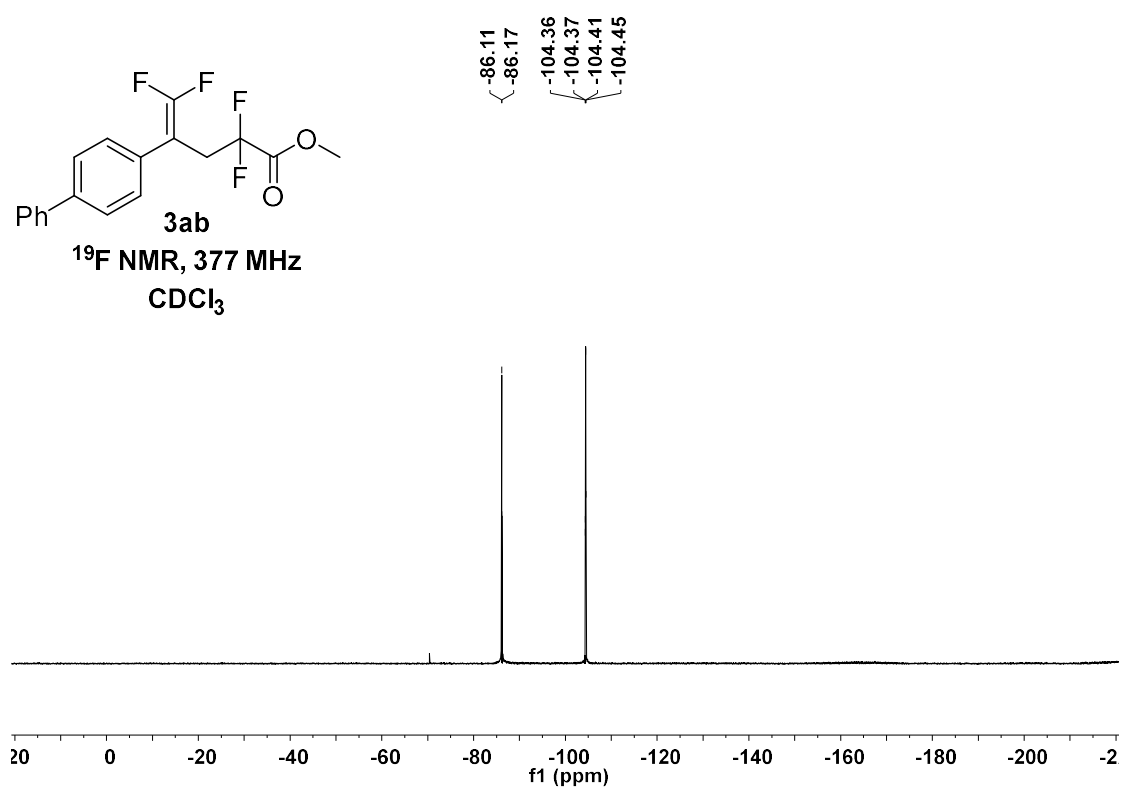

7.596  
7.591  
7.588  
7.584  
7.579  
7.574  
7.572  
7.454  
7.439  
7.436  
7.427  
7.424  
7.377  
7.370  
7.367  
7.365  
7.361  
7.353  
3.992  
3.978  
3.965  
3.263  
3.237  
3.233  
3.228  
3.202  
1.573  
1.559  
1.554  
1.547  
1.545  
1.541  
1.533  
1.529  
1.515  
1.337  
1.333  
1.322  
1.318  
1.308  
1.303  
1.293  
1.288  
1.274  
0.904  
0.889  
0.875

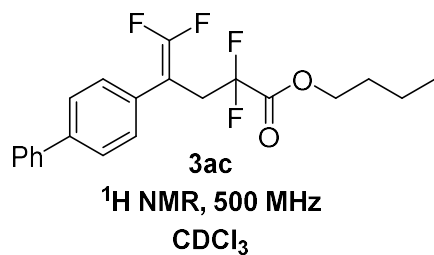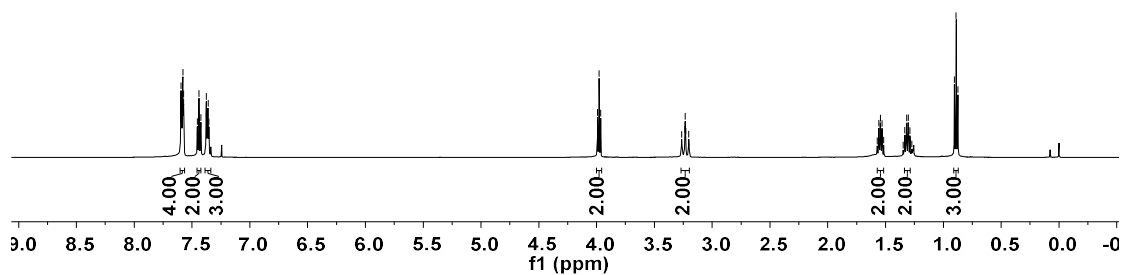

163.757  
163.500  
163.243  
157.684  
155.368  
153.041  
140.669  
140.261  
131.025  
128.853  
128.819  
127.548  
127.109  
126.971  
116.449  
114.519  
112.622  
84.722  
84.564  
84.406  
77.253  
77.000  
76.746  
66.765  
34.129  
33.936  
33.728  
30.068  
18.844  
13.538

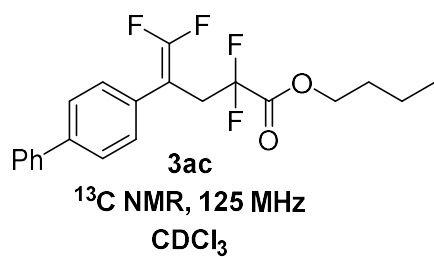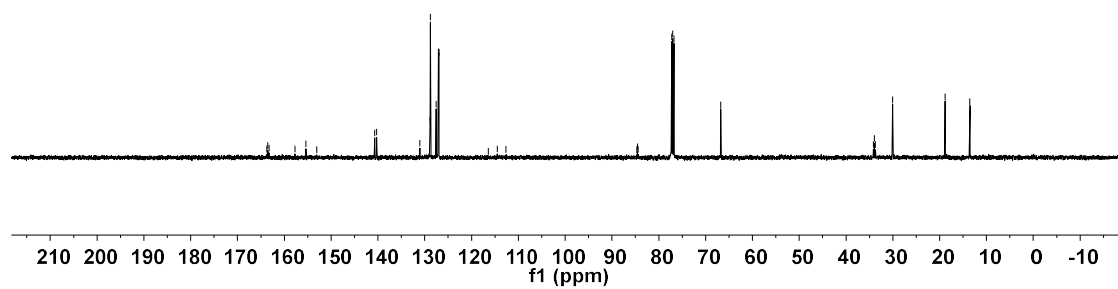

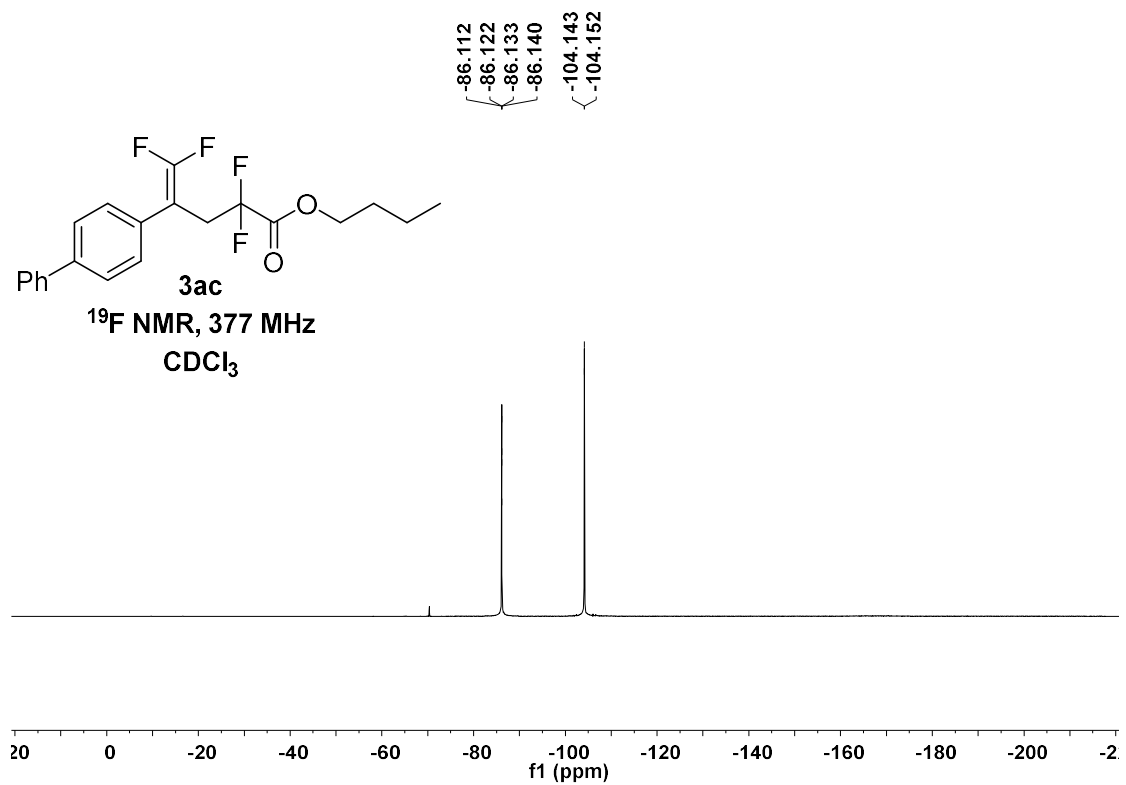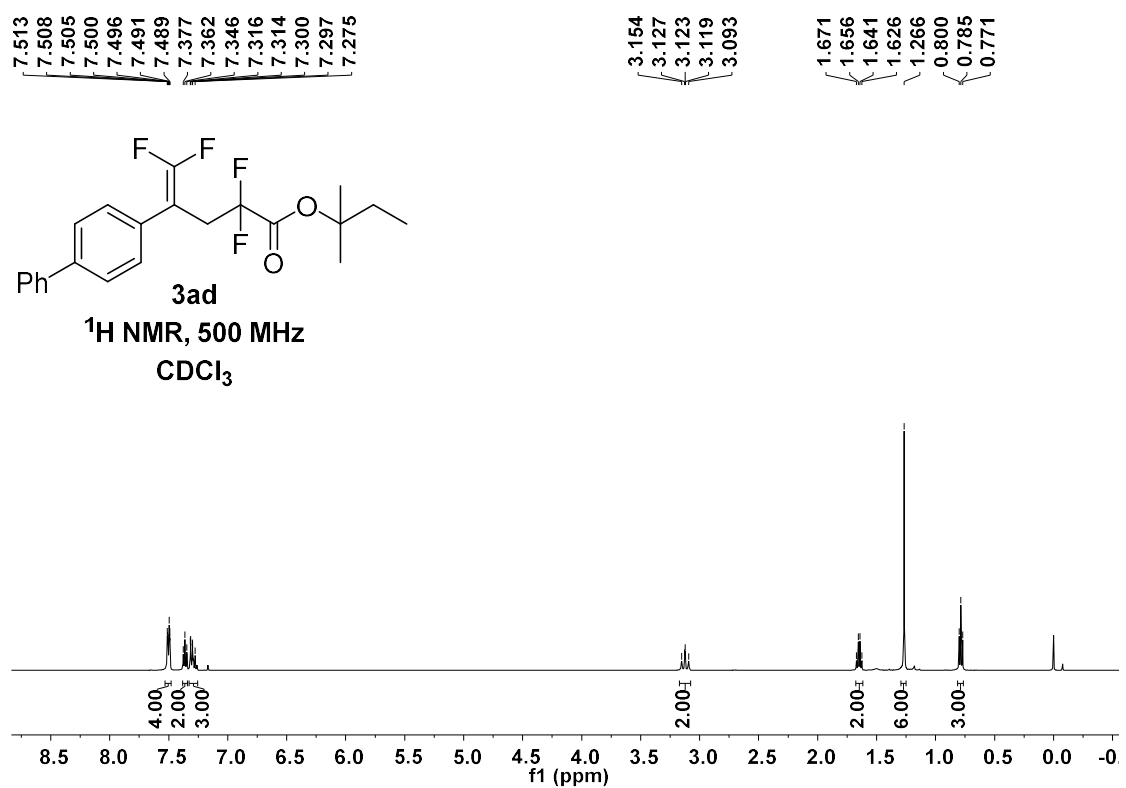

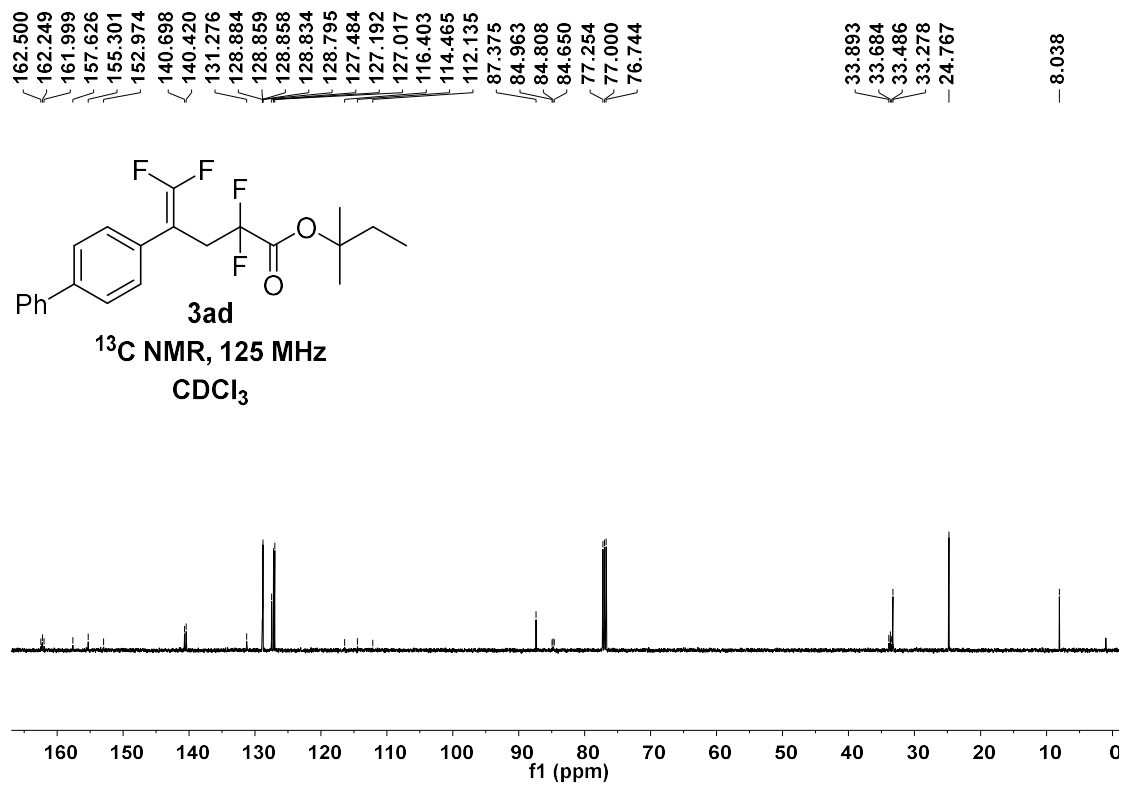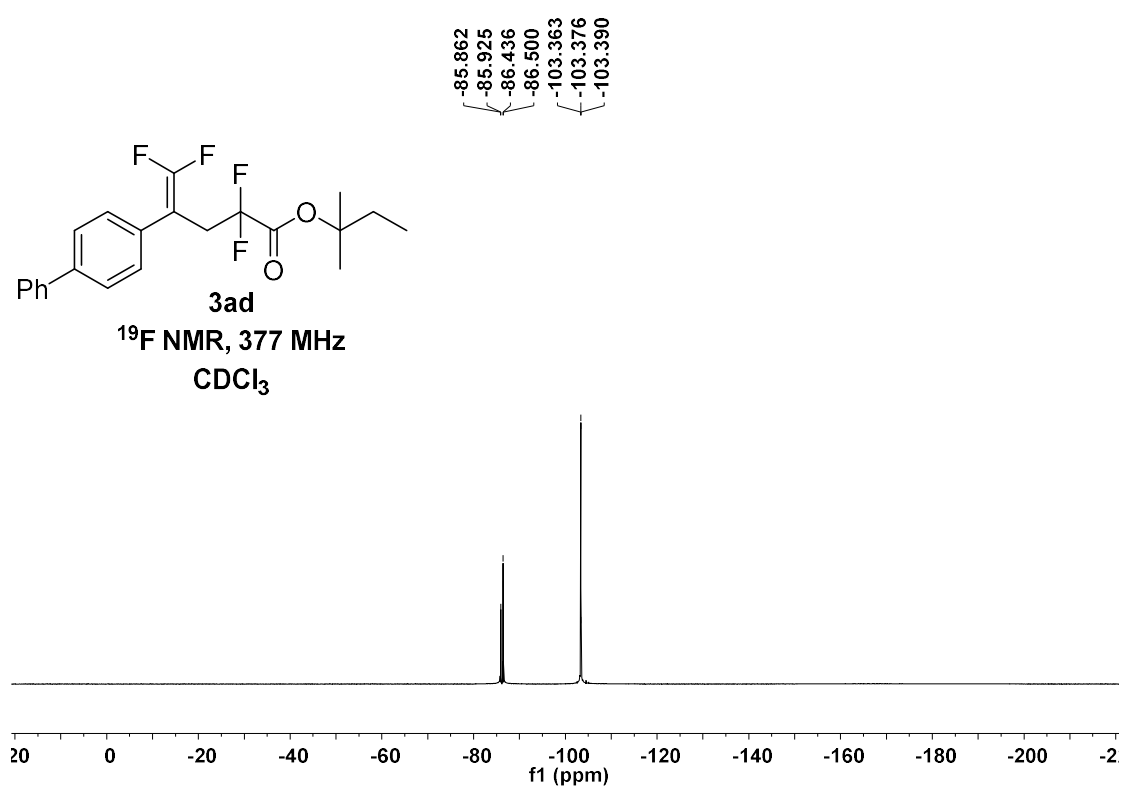

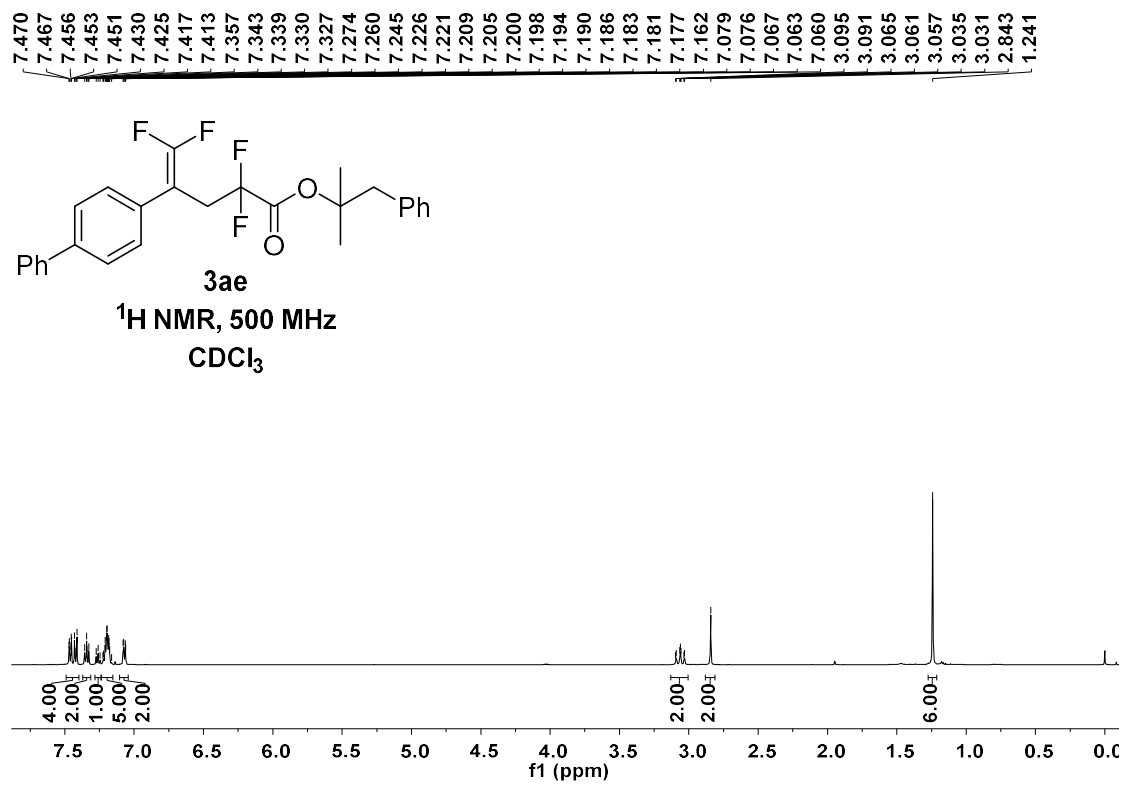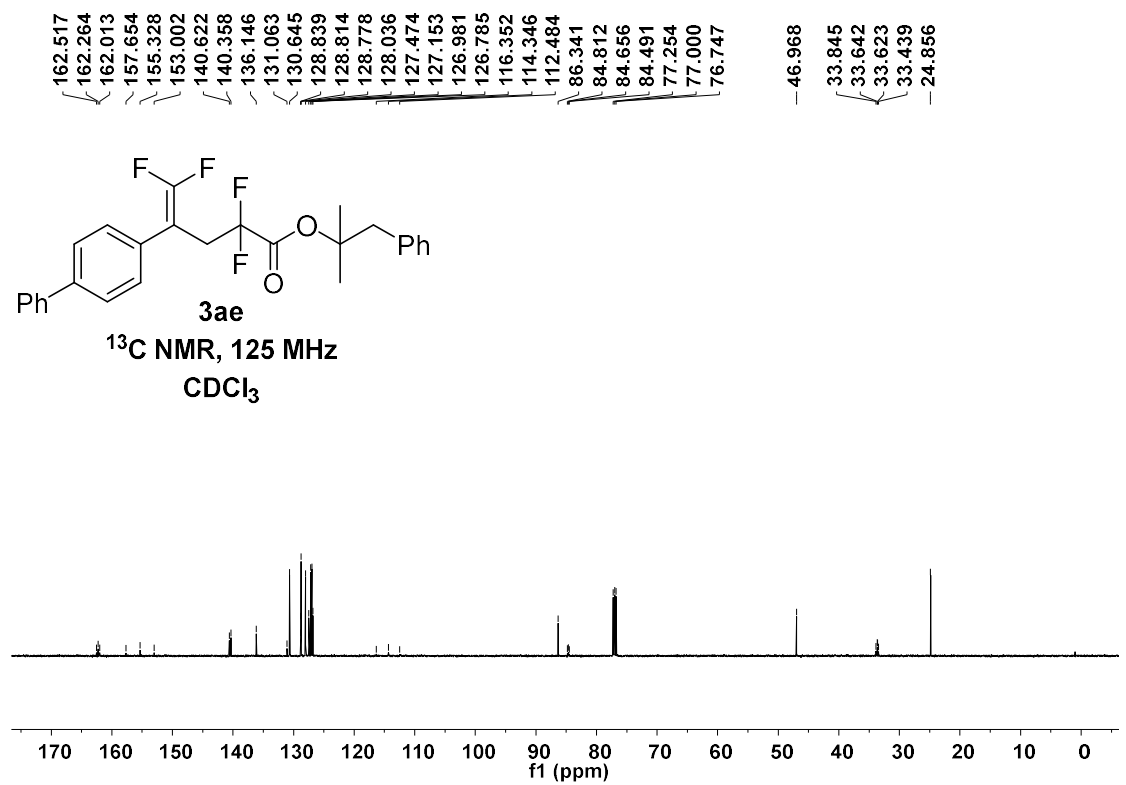

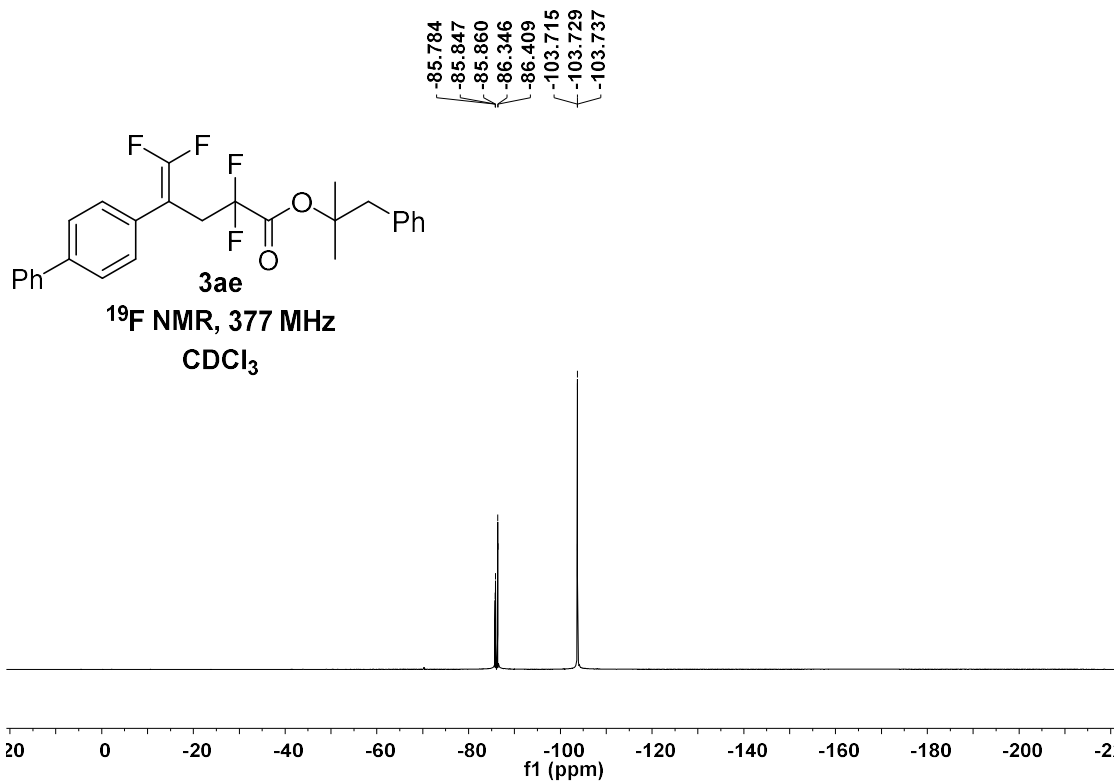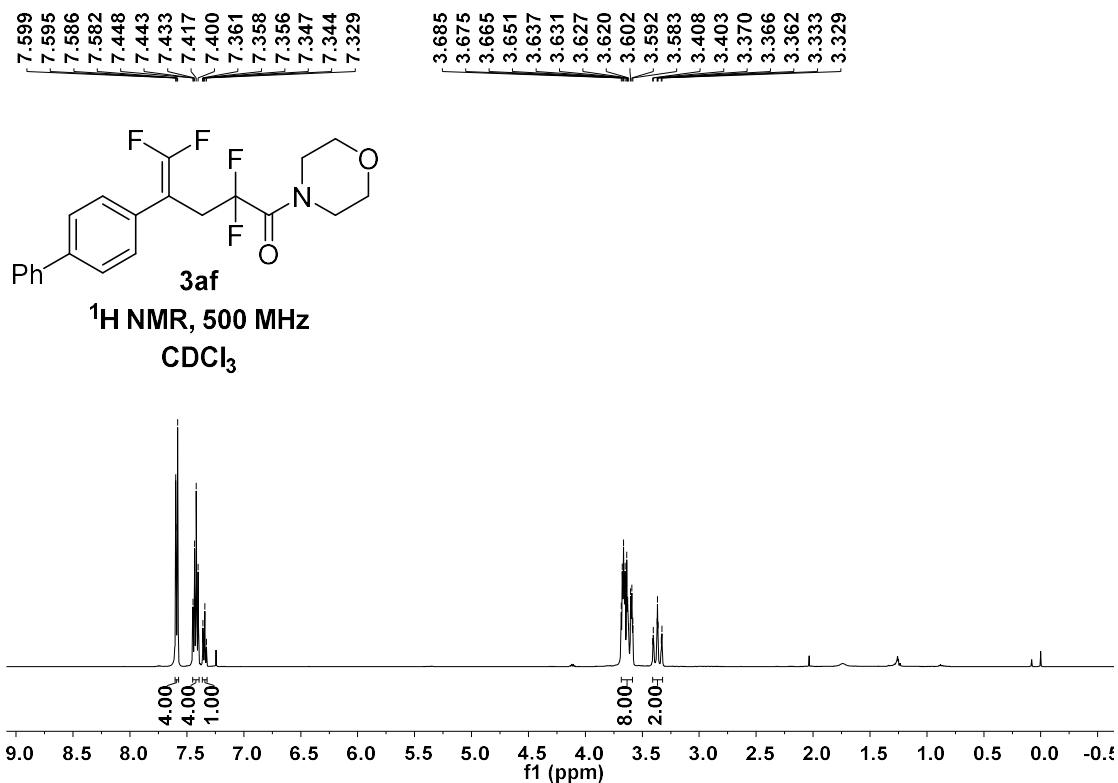

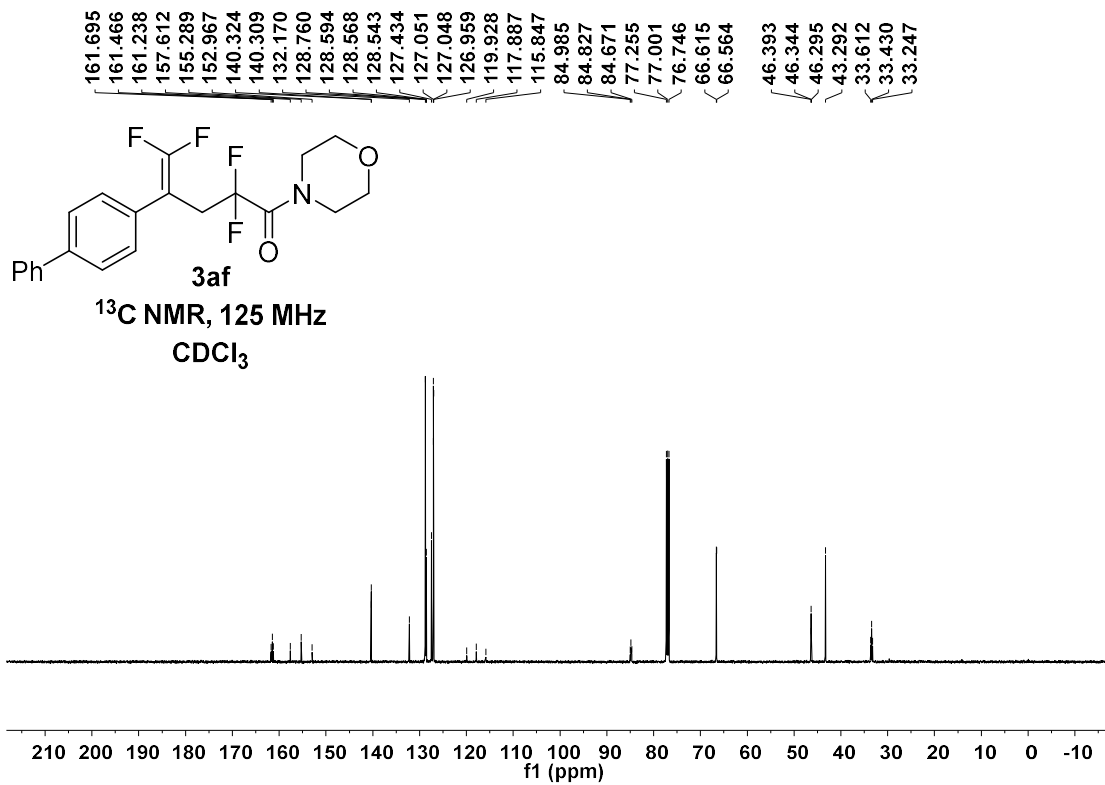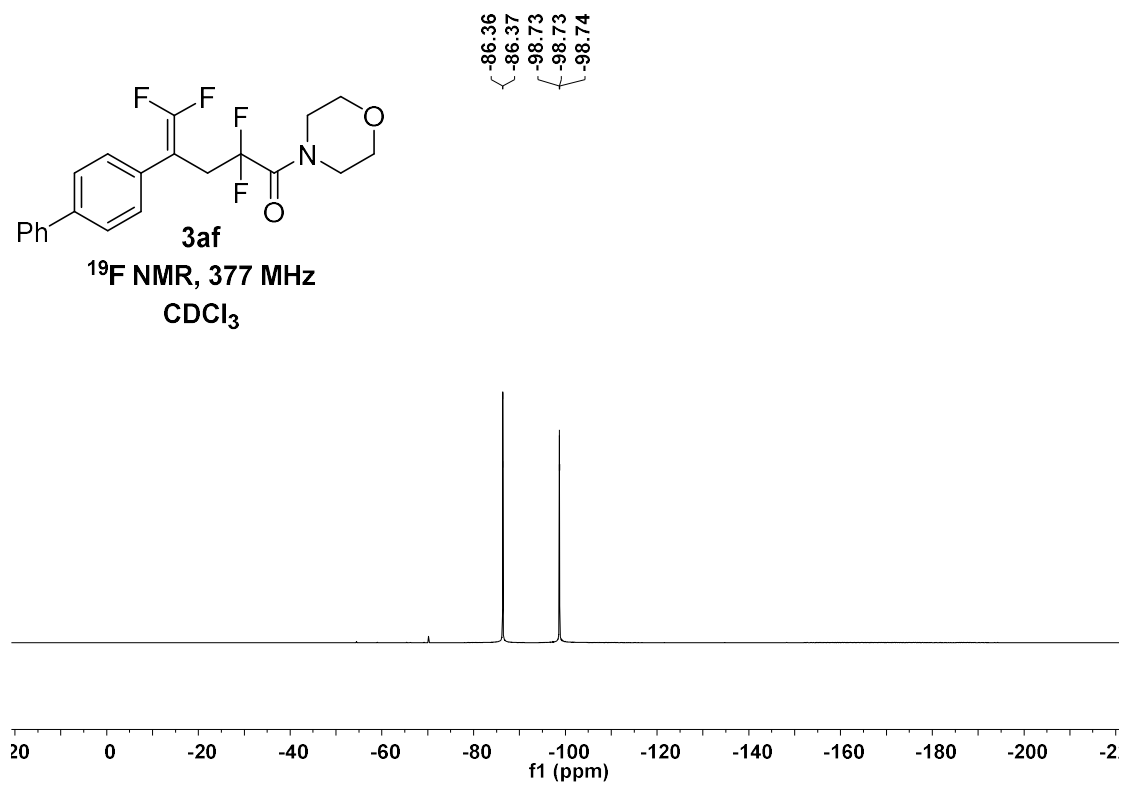



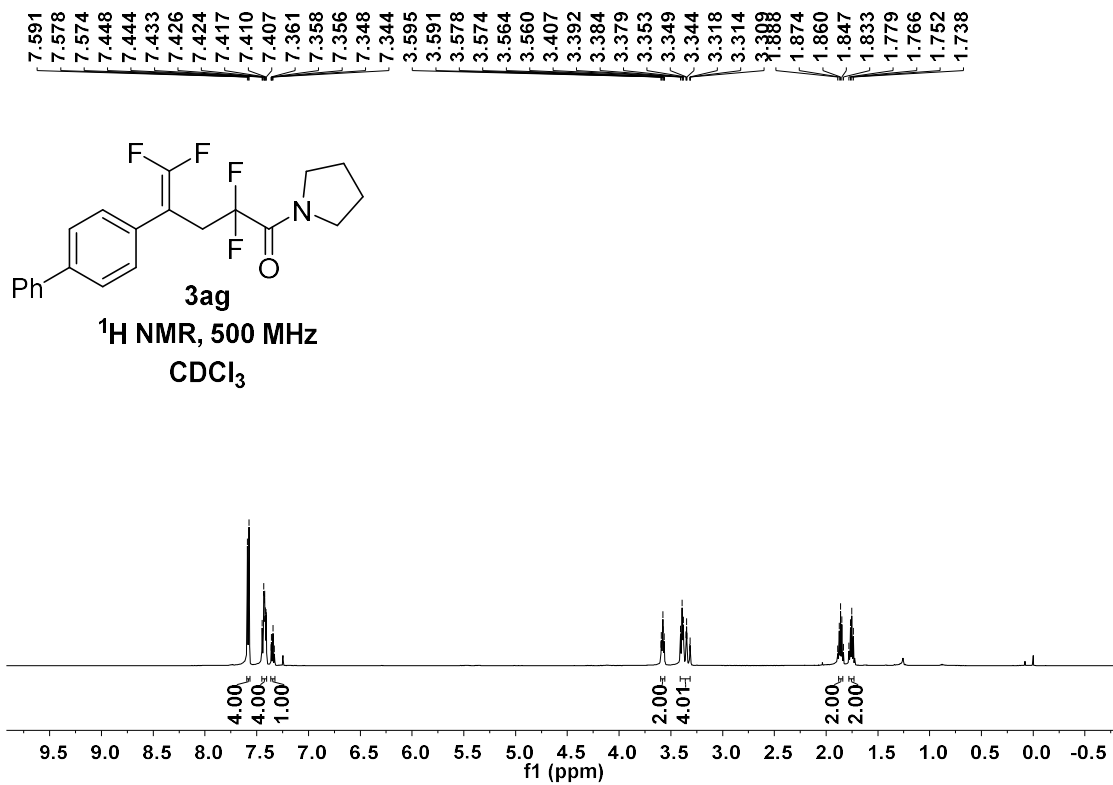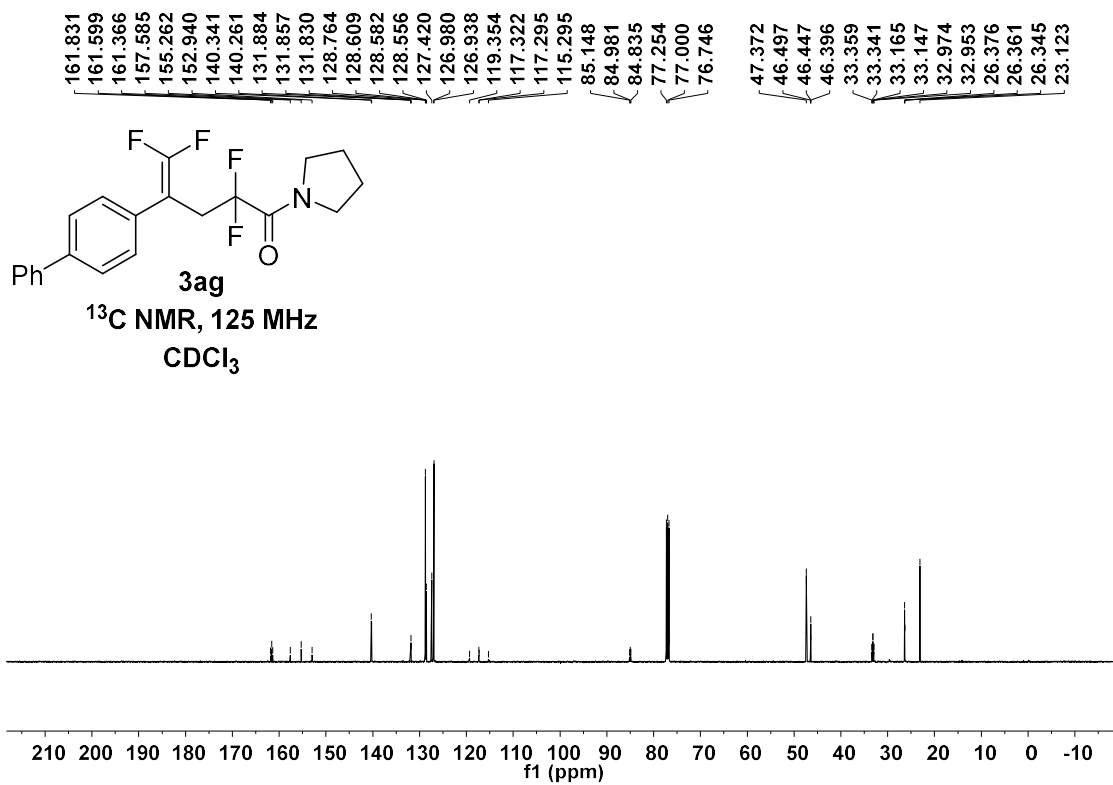

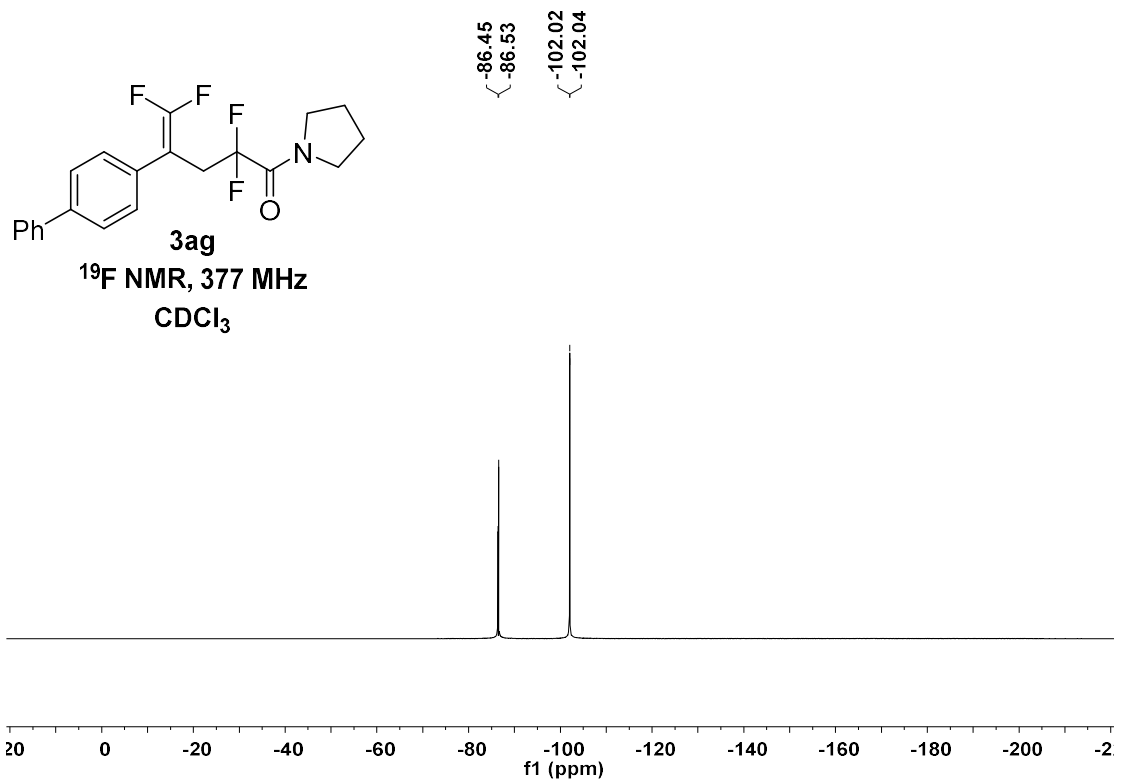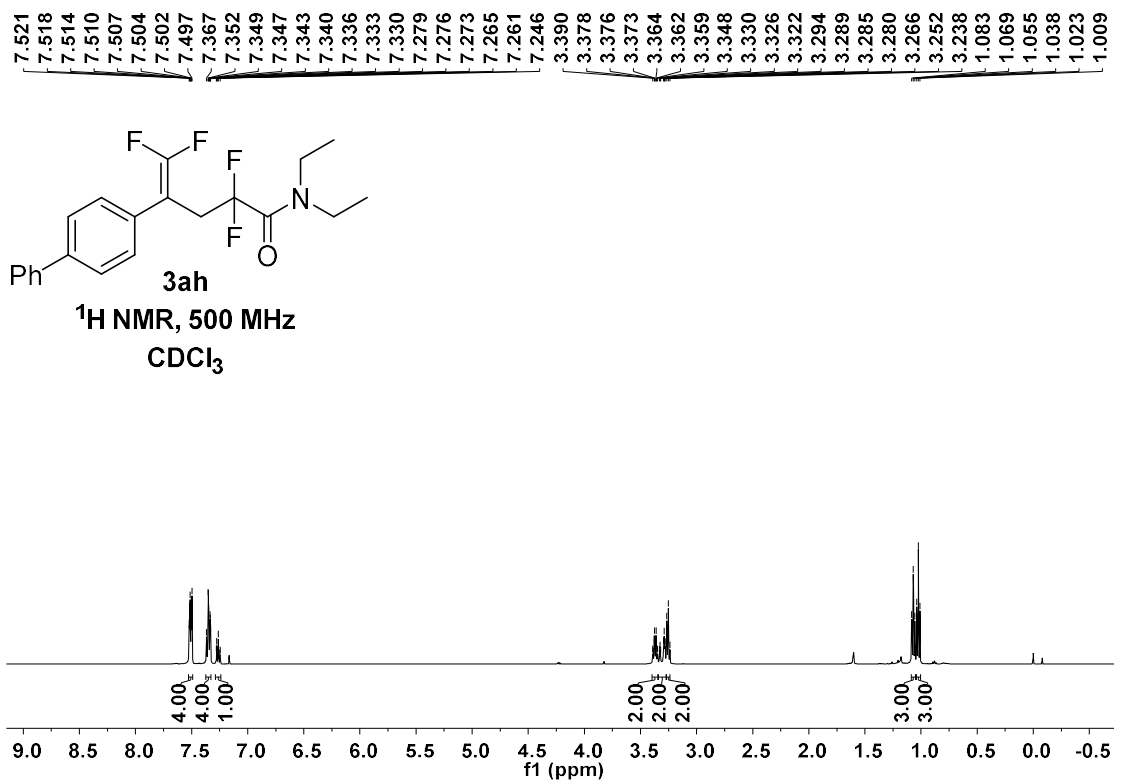

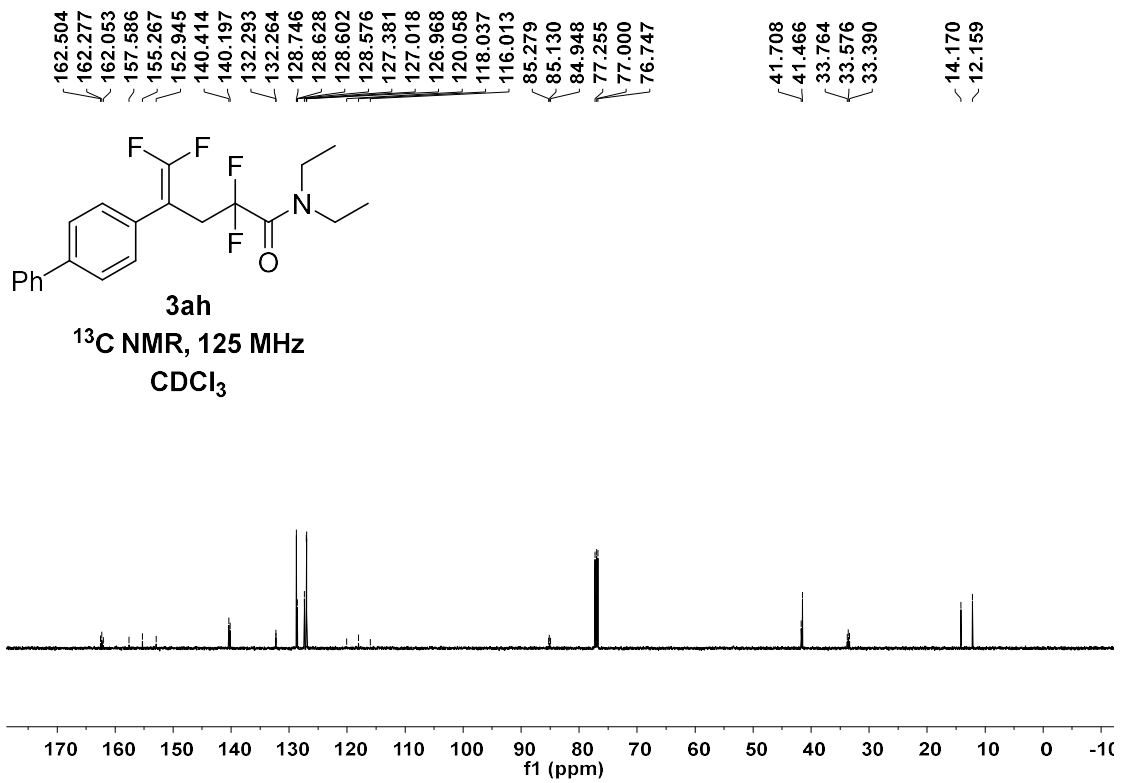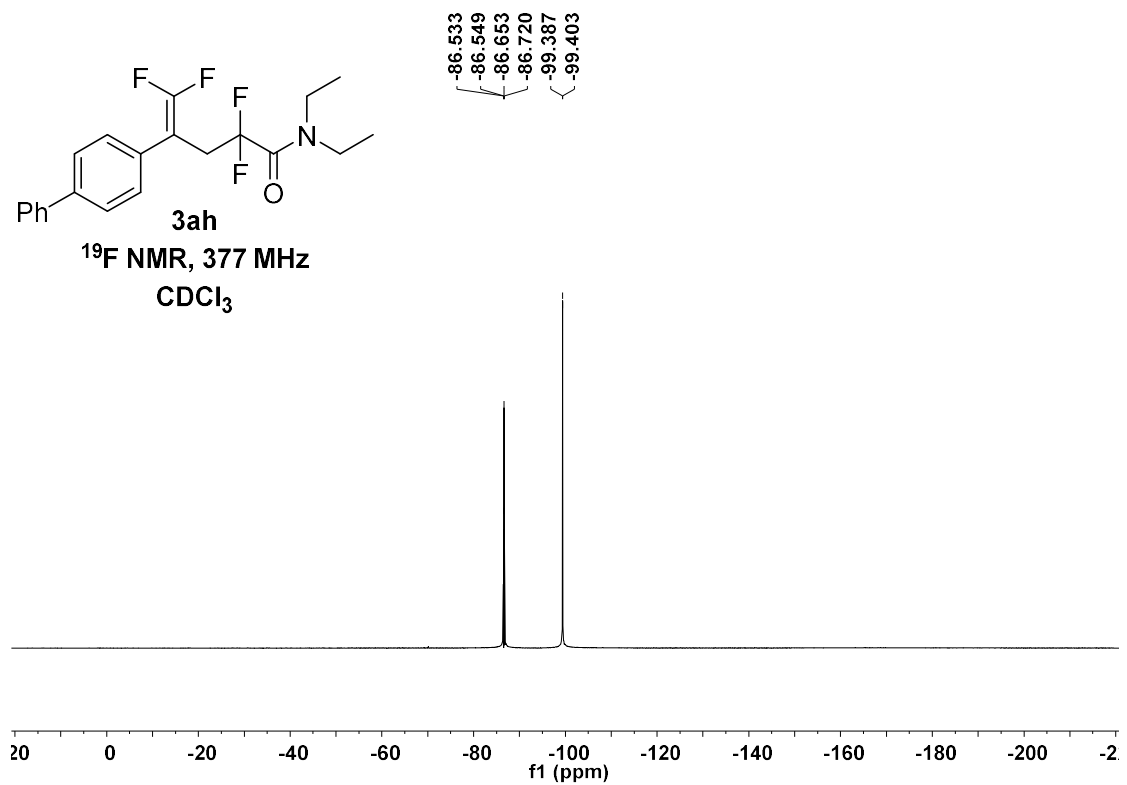

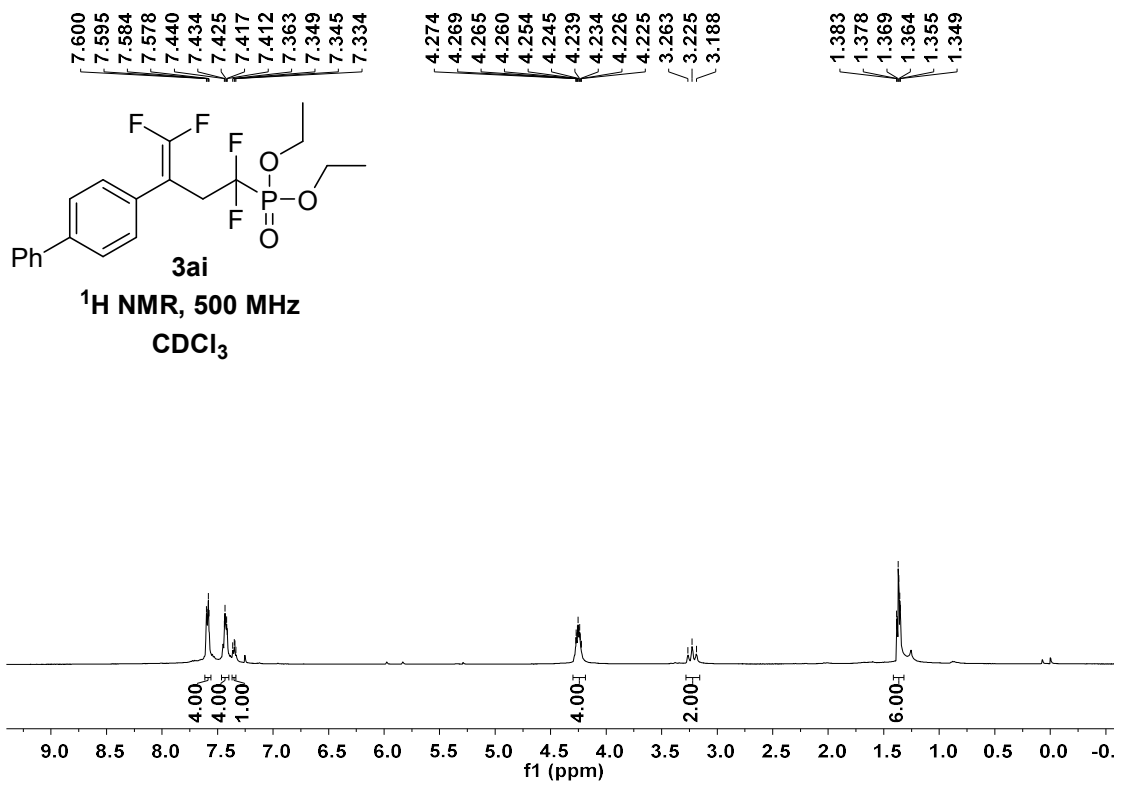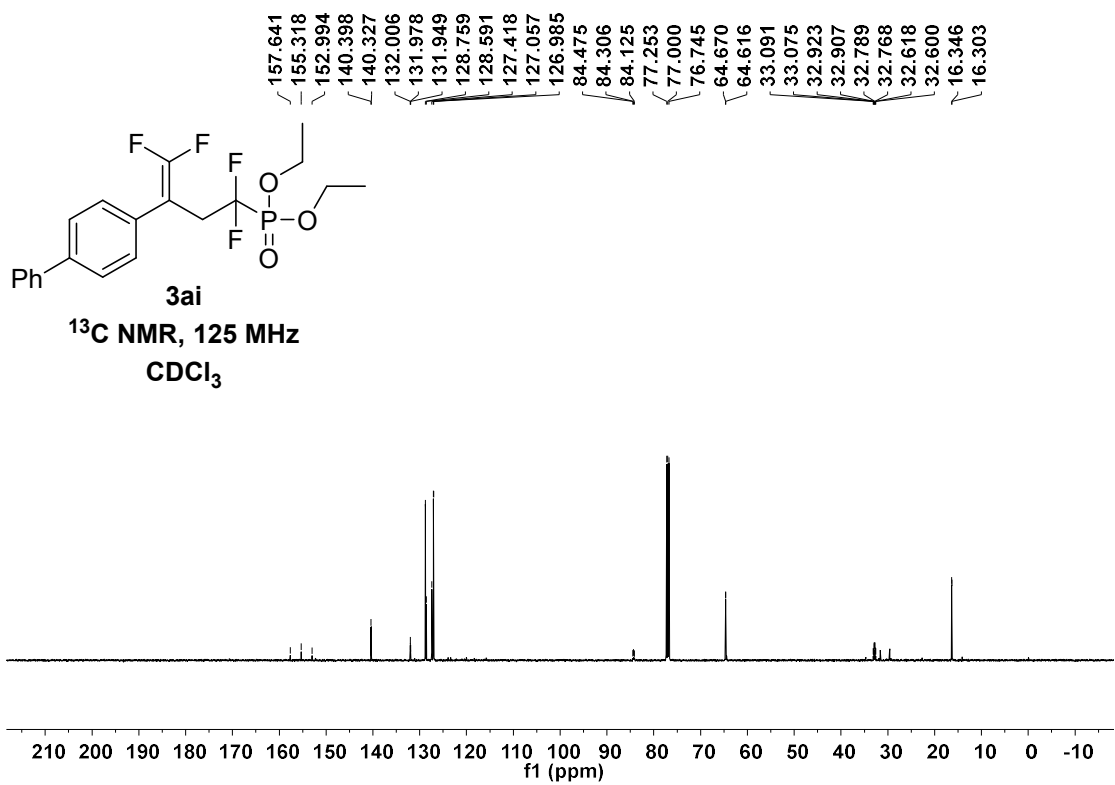

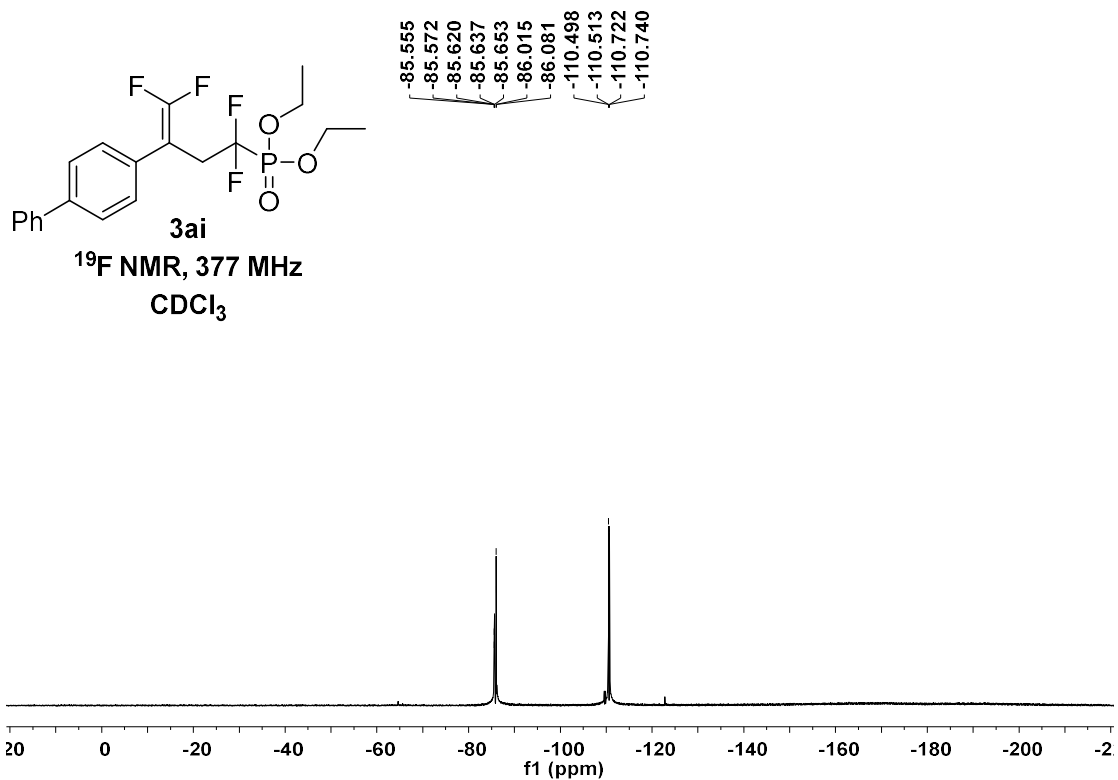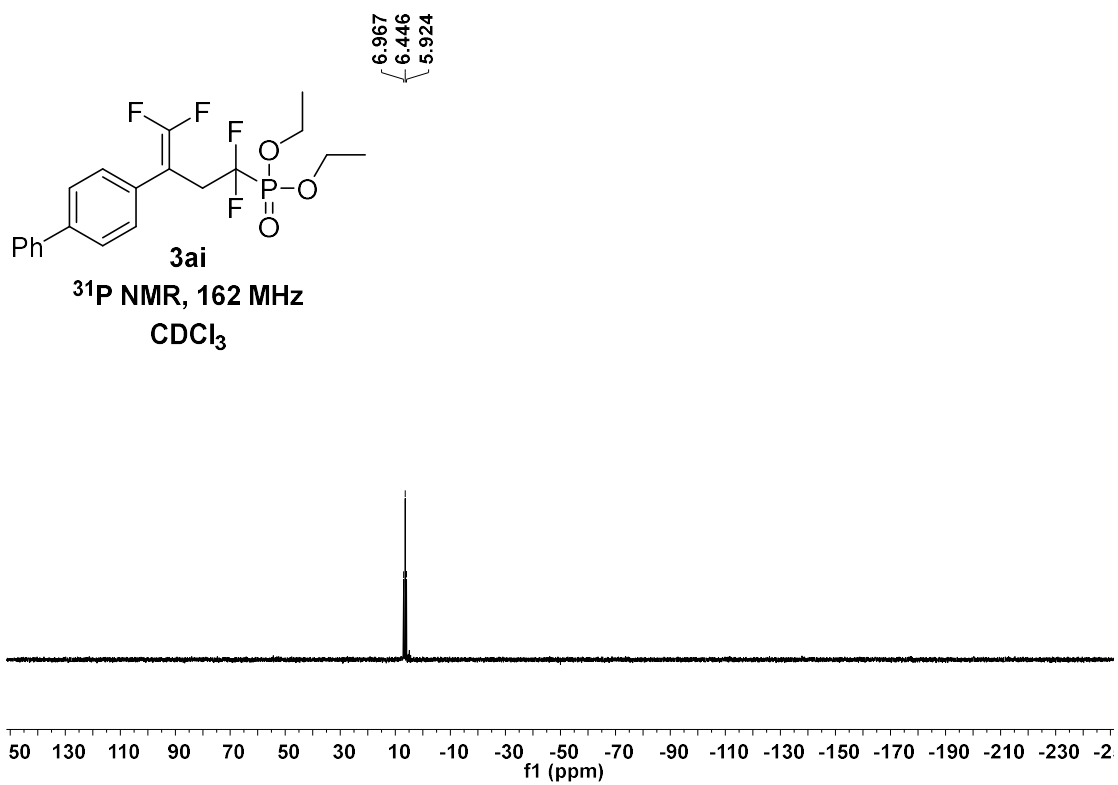

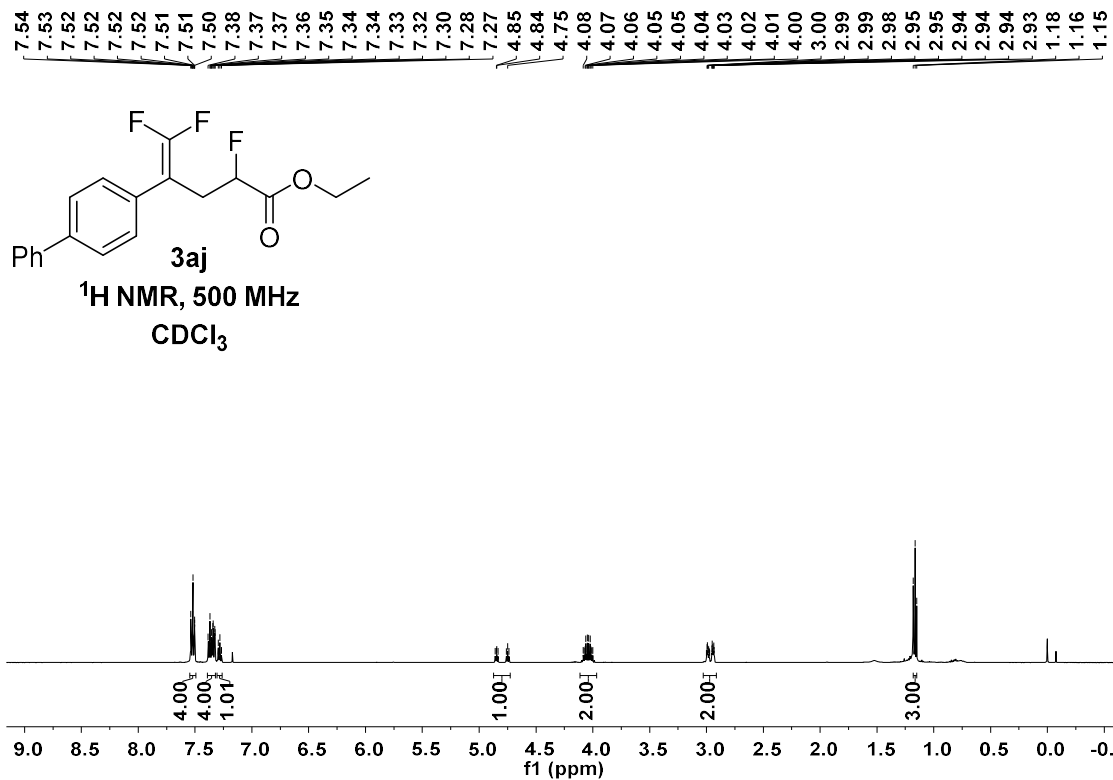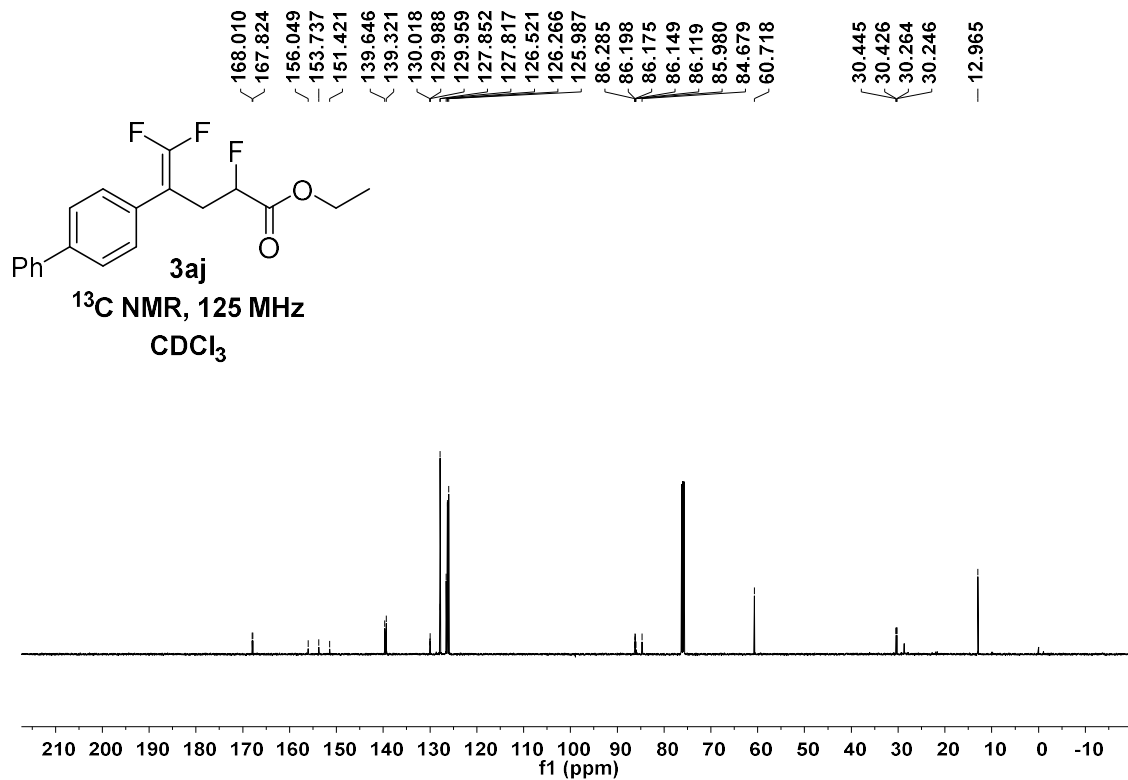

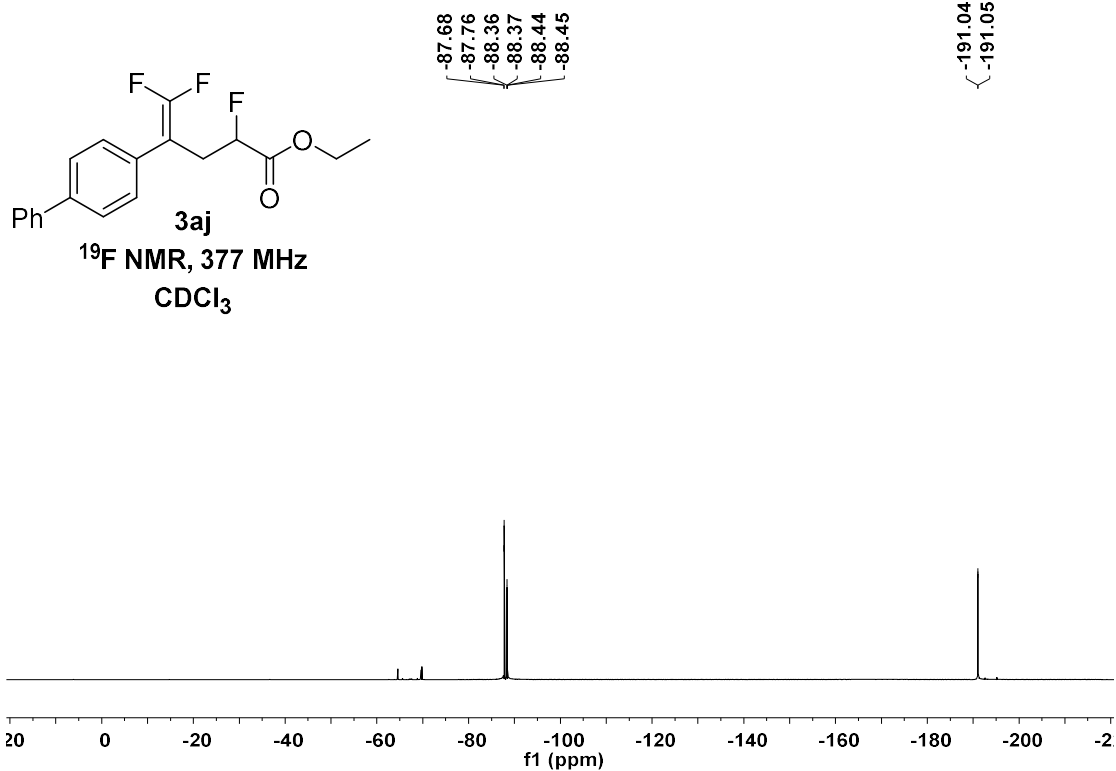

**4-([1,1'-biphenyl]-4-yl)-2,2,5,5-tetrafluoropent-4-en-1-ol (5)**

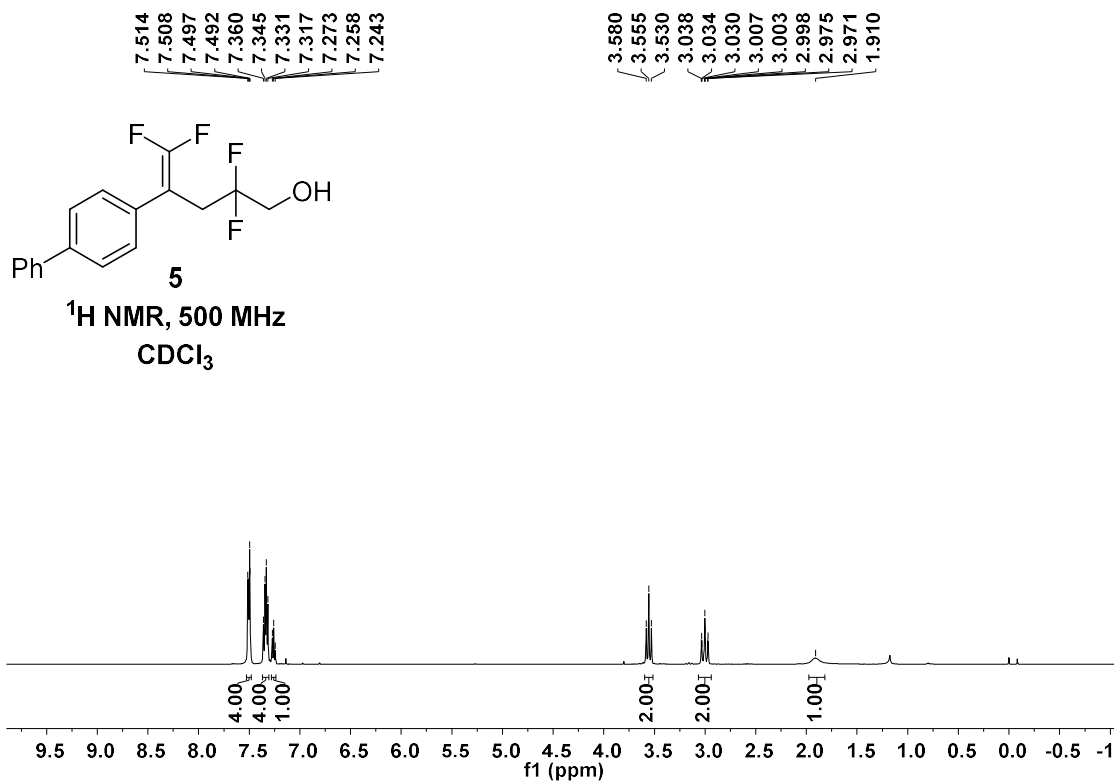

157.532  
 155.210  
 152.890  
 140.460  
 140.253  
 131.861  
 128.790  
 128.587  
 128.561  
 128.534  
 127.497  
 127.180  
 126.973  
 123.864  
 121.921  
 119.980  
 85.664  
 85.497  
 85.355  
 77.254  
 77.000  
 76.747  
 63.882  
 63.633  
 63.384  
 32.398  
 32.193  
 32.174  
 31.983

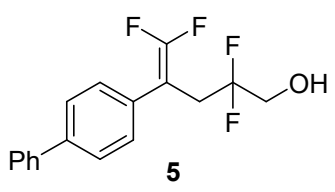

**<sup>13</sup>C NMR, 125 MHz  
CDCl<sub>3</sub>**

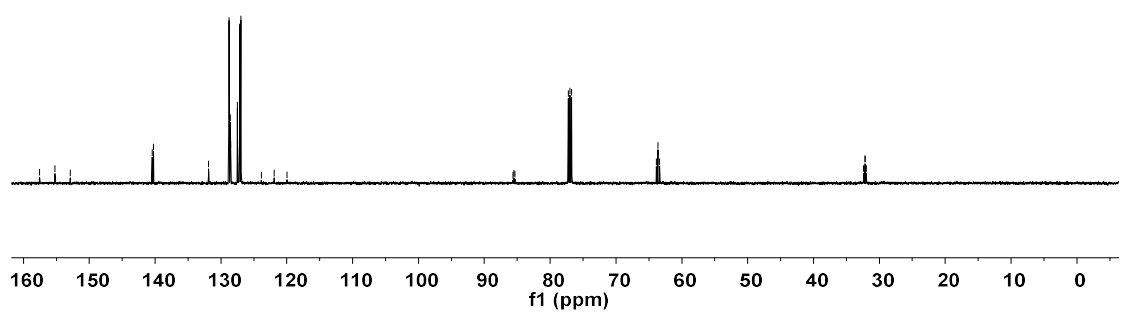

-86.477  
 -86.491  
 -86.545  
 -86.558  
 -86.571  
 -87.018  
 -87.086  
 -106.021  
 -106.061  
 -106.074  
 -106.083

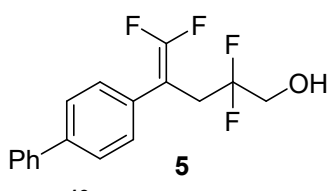

**<sup>19</sup>F NMR, 377 MHz  
CDCl<sub>3</sub>**

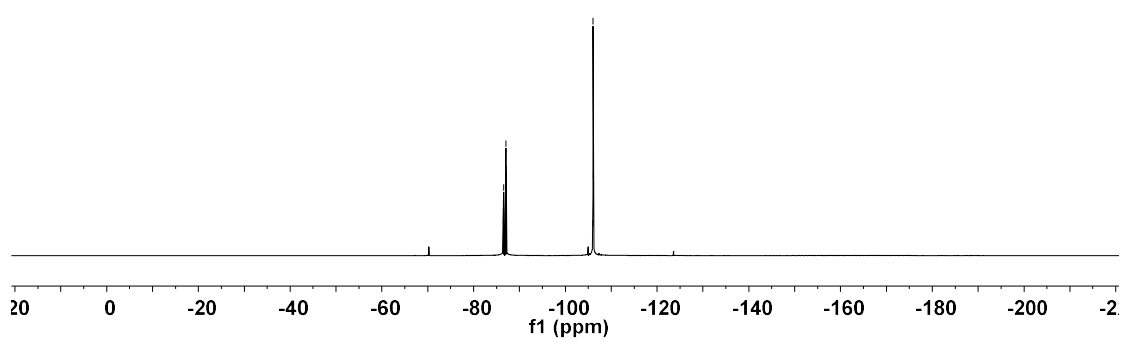



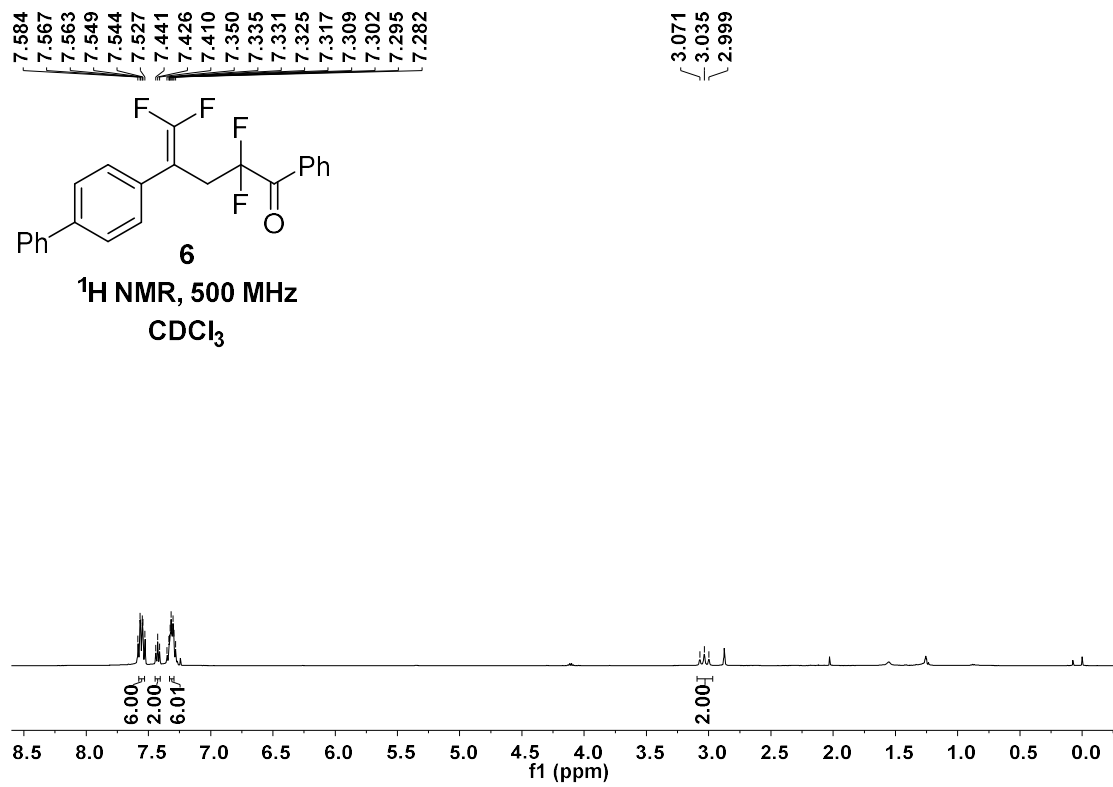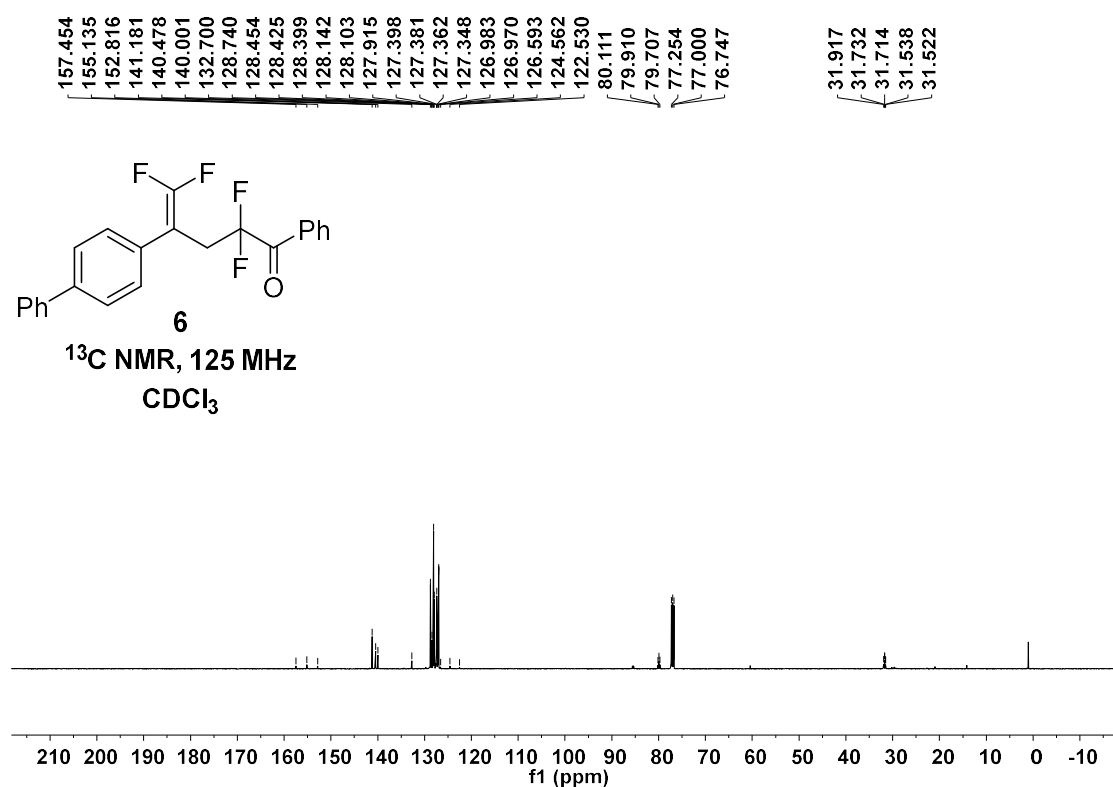

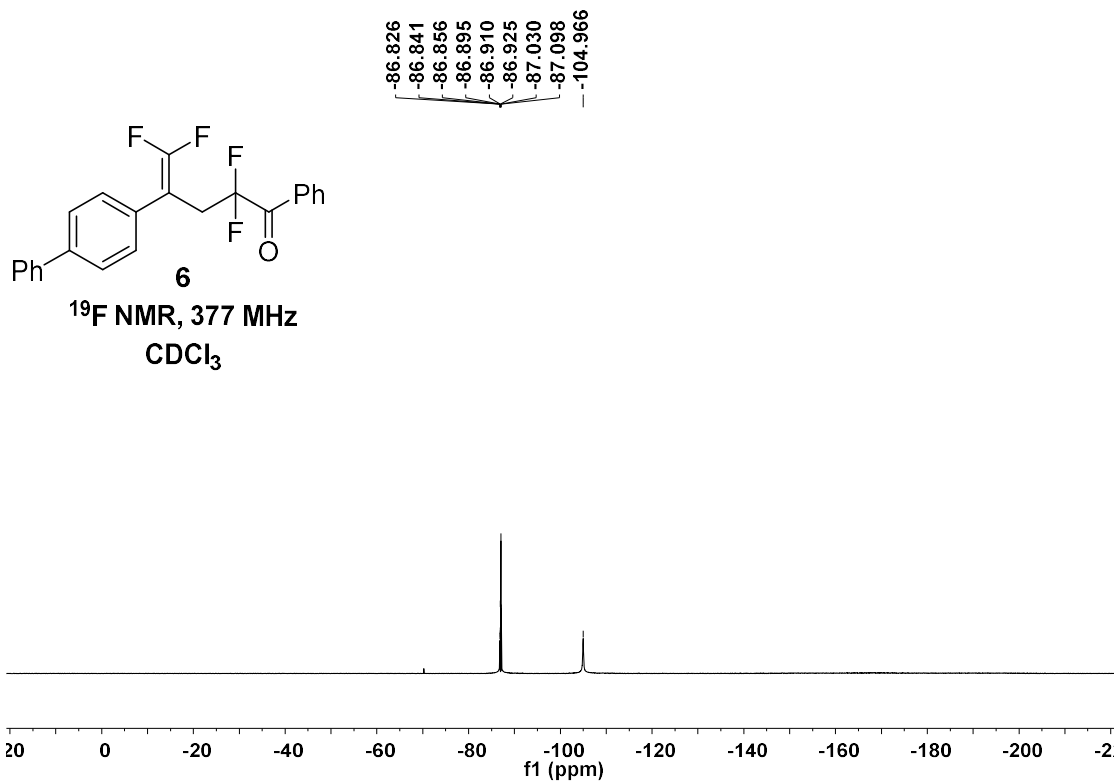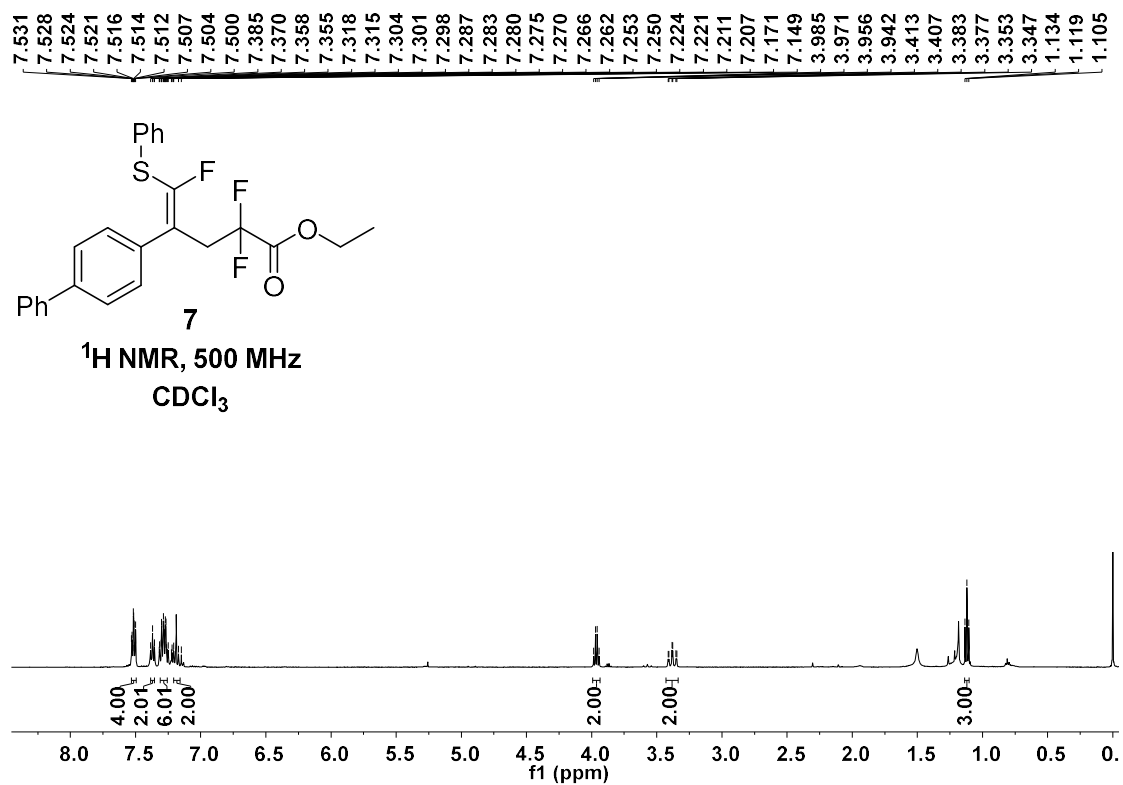

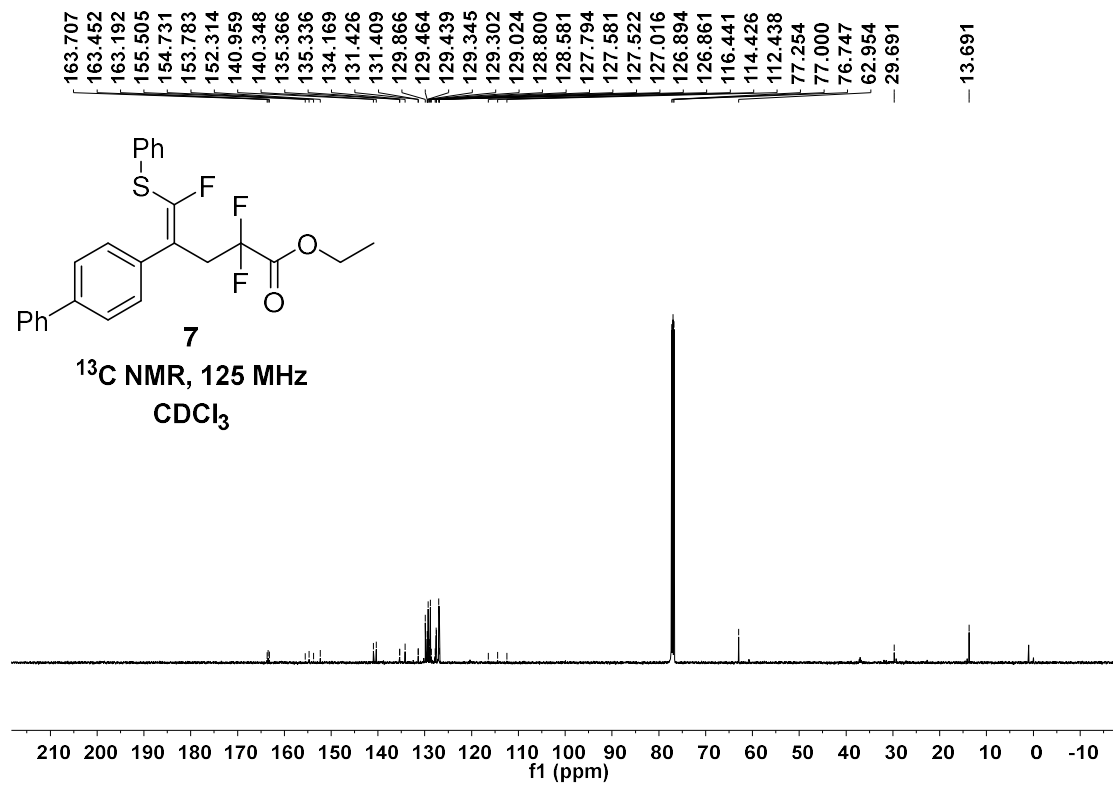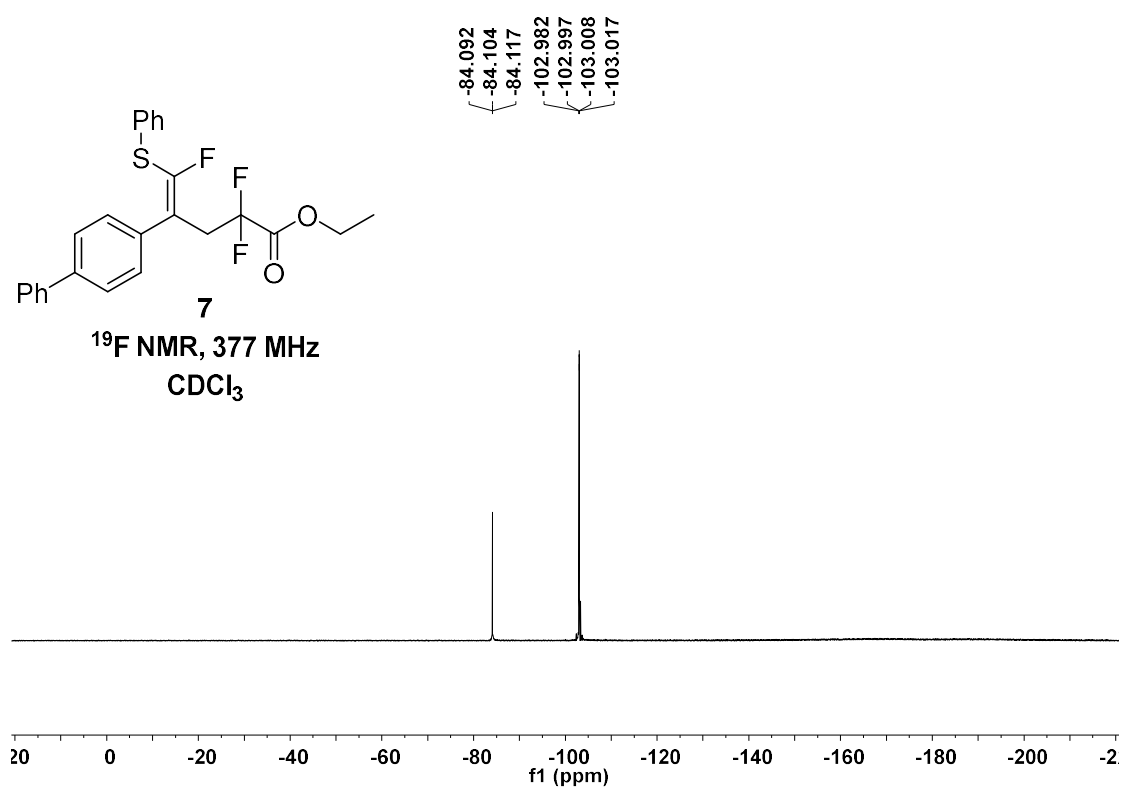

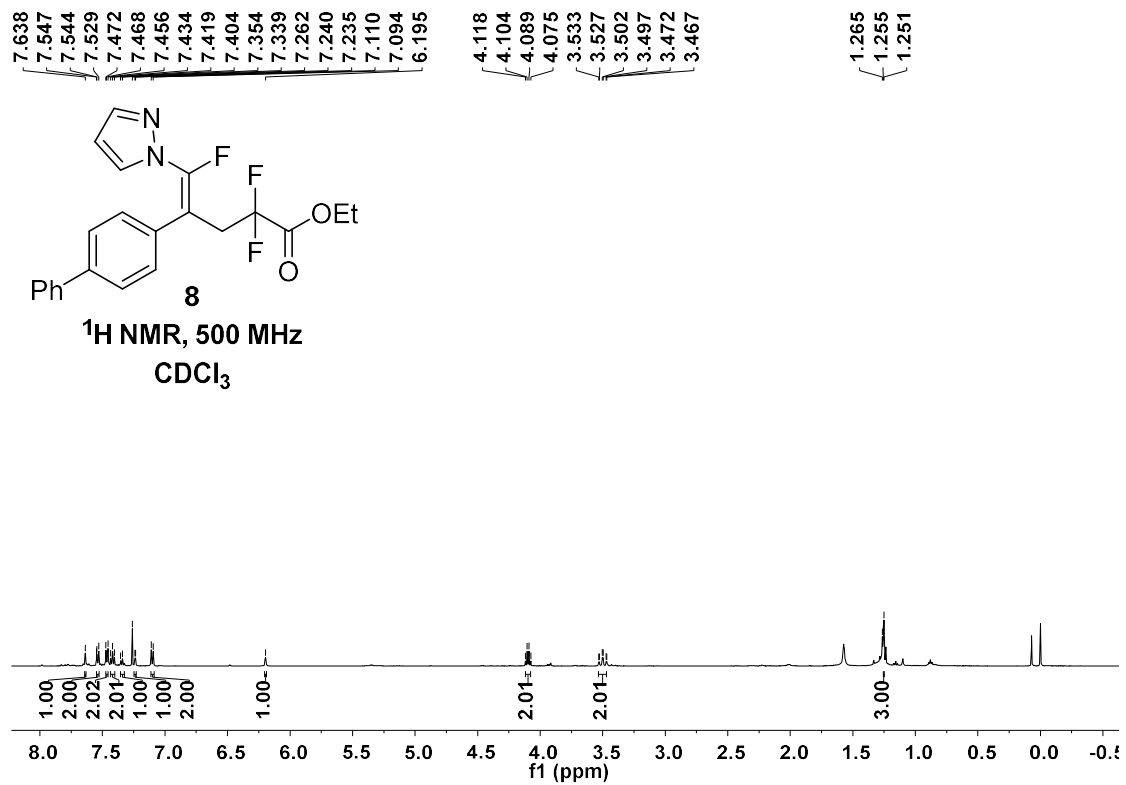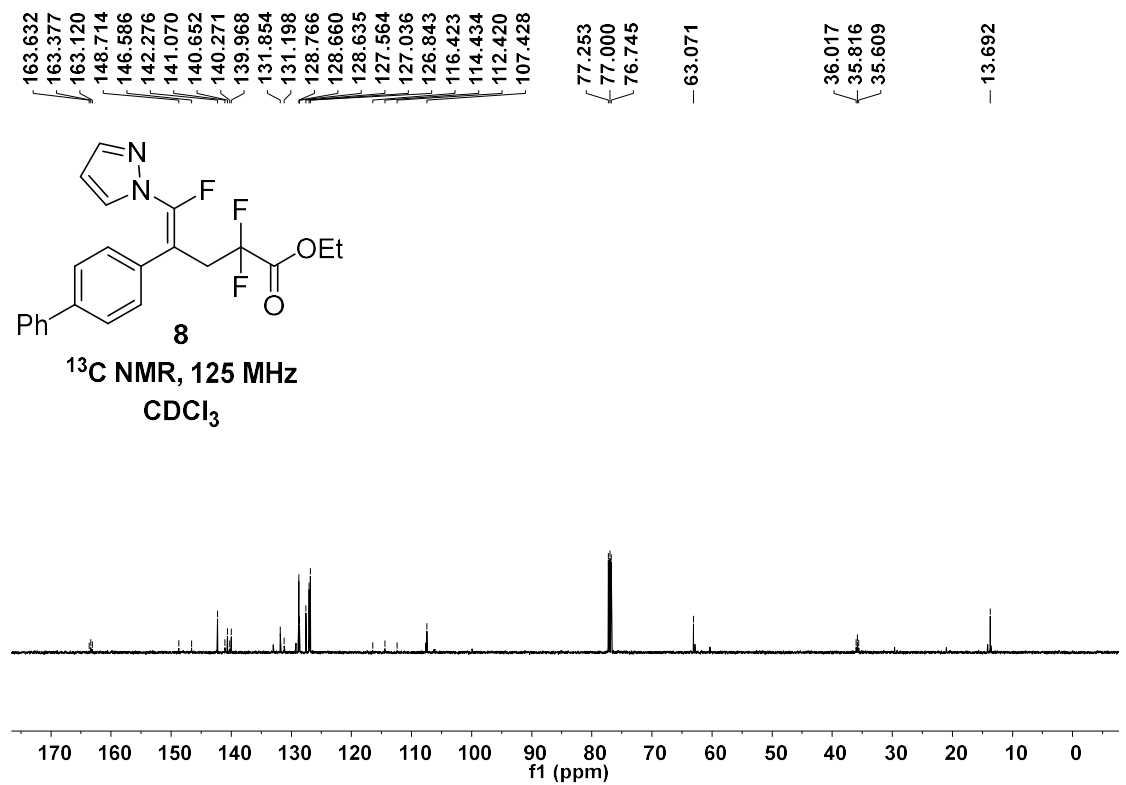

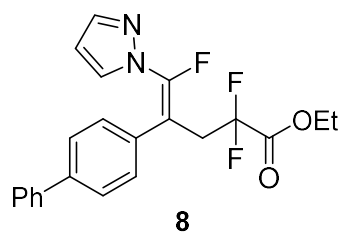

<sup>19</sup>F NMR, 377 MHz  
CDCl<sub>3</sub>

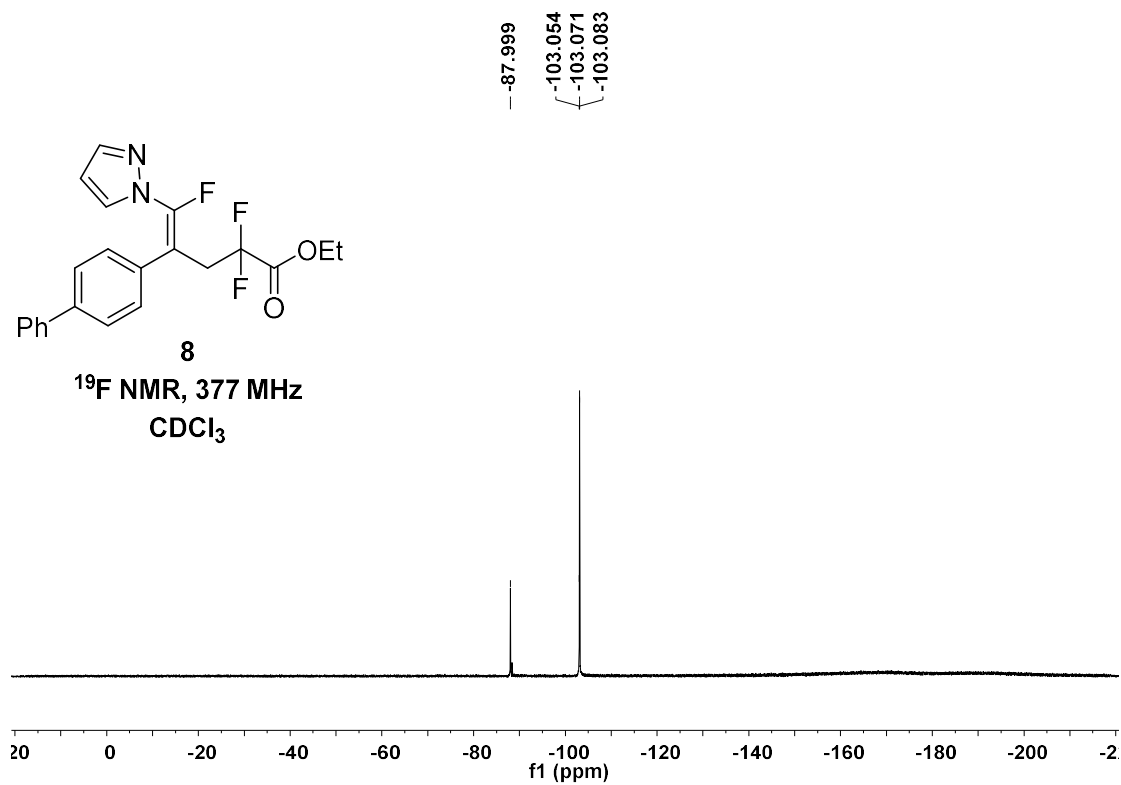

Supplement: d2cc06022a1.pdf [file d2cc06022a1.pdf]
